# Supplementary material for: Interactive effects of elevated carbon dioxide and environmental stresses on root mass fraction in plants: a meta-analytical synthesis using pairwise techniques
Source: Springer Nature journal article supplement (doi:10.1007/s00442-010-1572-x), 2010-02-12
Supplement: 442_2010_1572_MOESM1_ESM.pdf [file 442_2010_1572_MOESM1_ESM.pdf]

## Appendix Table

### **Wang XZ, Taub, TR. (2010). Interactive effects of elevated CO<sub>2</sub> and environmental stresses on root mass fraction in plants: A meta-analytical synthesis**

For each entry, it is noted whether the species is a woody (W) or herbaceous (H) species, or whether the species is or a community contains a leguminous (1) or non-leguminous (0) species, and the type of growth facility used in the empirical studies: CSTR (Continuous Stirred Tank Reactors), CTC (Closed-Top Chambers), FACE (Free Air CO<sub>2</sub> Enrichment), FieldChamb. (Field Chambers), GCGH (Growth Chambers, Greenhouses, or Phytotrons), OTC (Open-Top Chambers), solardomes, SPAR (Soil-Plant-Atmosphere Research Chambers), TGC (Temperature Gradient Chambers), TGG (Temperature Gradient Greenhouse), and tunnels. It is also noted if environmental stresses were imposed on the plants in the studies.

The sources of data in the publications, table (T) and figure (F), are included in the table. Entries are arranged by alphabetical order of species. References to the papers by two or more authors are abbreviated and listed using the format of first author *et al.* year. All the publications are listed in the Appendix References following this table.

| Species                       | W/H | Legume | Facility | Stress    | Source | References                 |
|-------------------------------|-----|--------|----------|-----------|--------|----------------------------|
| <i>Abelmoschus esculentus</i> | H   | 0      | GCGH     | None      | F2     | (Overdieck et al. 1988)    |
| <i>Abies fraseri</i>          | W   | 0      | GCGH     | None      | T3     | (Samuelson & Seiler 1992)  |
| <i>Abutilon theophrasti</i>   | H   | 0      | GCGH     | None/Temp | T4     | (Patterson et al. 1988)    |
| <i>Abutilon theophrasti</i>   | H   | 0      | GCGH     | None      | F1     | (Bazzaz et al. 1989)       |
| <i>Abutilon theophrasti</i>   | H   | 0      | GCGH     | None      | F1     | (Bernacchi et al. 2000)    |
| <i>Abutilon theophrasti</i>   | H   | 0      | GCGH     | None      | F1/F5  | (Coleman & Bazzaz 1992)    |
| <i>Abutilon theophrasti</i>   | H   | 0      | GCGH     | None      | T1     | (Dippery et al. 1995)      |
| <i>Abutilon theophrasti</i>   | H   | 0      | GCGH     | None      | T1/T3  | (Patterson & Flint 1980)   |
| <i>Abutilon theophrasti</i>   | H   | 0      | GCGH     | None      | T4     | (Thomas et al. 1999)       |
| <i>Abutilon theophrasti</i>   | H   | 0      | GCGH     | None      | F1/F4  | (Tremmel & Patterson 1993) |
| <i>Acacia aneura</i>          | W   | 1      | GCGH     | None      | T1     | (Atkin et al. 1999)        |
| <i>Acacia aneura</i>          | W   | 1      | GCGH     | None      | T2     | (Schortemeyer et al. 2002) |
| <i>Acacia auriculiformis</i>  | W   | 1      | GCGH     | None/Fert | F1/T2  | (Nguyen et al. 2006)       |

|                               |   |   |      |                     |       |                            |
|-------------------------------|---|---|------|---------------------|-------|----------------------------|
| <i>Acacia colei</i>           | W | 1 | GCGH | None                | T1    | (Atkin et al. 1999)        |
| <i>Acacia coriacea</i>        | W | 1 | GCGH | None                | T1    | (Atkin et al. 1999)        |
| <i>Acacia dealbata</i>        | W | 1 | GCGH | None                | T1    | (Atkin et al. 1999)        |
| <i>Acacia dealbata</i>        | W | 1 | GCGH | None                | T2    | (Schortemeyer et al. 2002) |
| <i>Acacia implexa</i>         | W | 1 | GCGH | None                | T1    | (Atkin et al. 1999)        |
| <i>Acacia implexa</i>         | W | 1 | GCGH | None                | T2    | (Schortemeyer et al. 2002) |
| <i>Acacia irrorata</i>        | W | 1 | GCGH | None                | T1    | (Atkin et al. 1999)        |
| <i>Acacia irrorata</i>        | W | 1 | GCGH | None                | T2    | (Schortemeyer et al. 2002) |
| <i>Acacia karroo</i>          | W | 1 | GCGH | None/UV-B           | F5    | (Wand et al. 1996)         |
| <i>Acacia magium</i>          | W | 1 | GCGH | None/Fert           | F1/T2 | (Nguyen et al. 2006)       |
| <i>Acacia magium</i>          | W | 1 | GCGH | None                | T1    | (Ziska et al. 1991)        |
| <i>Acacia meanrsii</i>        | W | 1 | GCGH | None                | T2    | (Schortemeyer et al. 2002) |
| <i>Acacia meanrsii</i>        | W | 1 | GCGH | None                | T1    | (Atkin et al. 1999)        |
| <i>Acacia melanoxylon</i>     | W | 1 | GCGH | None                | T1    | (Atkin et al. 1999)        |
| <i>Acacia melanoxylon</i>     | W | 1 | GCGH | None                | T2    | (Schortemeyer et al. 2002) |
| <i>Acacia saligna</i>         | W | 1 | GCGH | None                | T1    | (Atkin et al. 1999)        |
| <i>Acacia smallii</i>         | W | 1 | GCGH | None                | T2    | (Polley et al. 1997)       |
| <i>Acacia tetragonophylla</i> | W | 1 | GCGH | None                | T1    | (Atkin et al. 1999)        |
| <i>Acacia tetragonophylla</i> | W | 1 | GCGH | None                | T2    | (Schortemeyer et al. 2002) |
| <i>Acer pensylvanicum</i>     | W | 0 | GCGH | None/Temp/Fert      | T1    | (Bassow et al. 1994)       |
| <i>Acer rubrum</i>            | W | 0 | GCGH | None                | F1/T1 | (Bazzaz et al. 1990)       |
| <i>Acer rubrum</i>            | W | 0 | GCGH | None/Water/Flooding | F2    | (Miao et al. 1992)         |
| <i>Acer rubrum</i>            | W | 0 | GCGH | None                | F2    | (Vann & Megonigal 2002)    |
| <i>Acer saccharum</i>         | W | 0 | GCGH | None                | F1/T1 | (Bazzaz et al. 1990)       |
| <i>Acer saccharum</i>         | W | 0 | GCGH | None/O <sub>3</sub> | F1    | (Guacher et al. 2003)      |
| <i>Acer saccharum</i>         | W | 0 | OTC  | None                | F2    | (Gaucher et al. 2005)      |
| <i>Acer saccharum</i>         | W | 0 | GCGH | None/O <sub>3</sub> | T3    | (Noble et al. 1992)        |
| <i>Acer saccharum</i>         | W | 0 | GCGH | None                | T1    | (Parsons et al. 2003)      |
| <i>Acer saccharum</i>         | W | 0 | OTC  | None/Water          | F1    | (Tschaplinski et al. 1995) |
| <i>Achillea millefolium</i>   | H | 0 | FACE | None                | T1    | (Reich et al. 2001)        |
| <i>Achnatherum hymenoides</i> | H | 0 | GCGH | None                | T2    | (Yoder et al. 2000)        |
| <i>Acmena smithii</i>         | W | 0 | GCGH | None                | T1    | (Roden et al. 1997)        |
| <i>Aechmea magdalenae</i>     | H | 0 | GCGH | None                | T1    | (Ziska et al. 1991)        |

|                                   |   |   |           |                          |       |                            |
|-----------------------------------|---|---|-----------|--------------------------|-------|----------------------------|
| <i>Agave deserti</i>              | H | 0 | GCGH      | None                     | T2    | (Graham & Nobel 1996)      |
| <i>Agave deserti</i>              | H | 0 | GCGH      | None                     | F2    | (Nobel & Hartsock 1986)    |
| <i>Agonis flexuosa</i>            | W | 0 | GCGH      | None                     | T4    | (Downton & Grant 1994)     |
| <i>Agropyron repens</i>           | H | 0 | FACE      | None                     | T1    | (Reich et al. 2001)        |
| <i>Agropyron smithii</i>          | H | 0 | GCGH      | None/Fert/O <sub>3</sub> | F3/T2 | (Volin & Reich 1996)       |
| <i>Agrostis canina</i>            | H | 0 | GCGH      | None                     | F4    | (Fordham et al. 1997)      |
| <i>Agrostis capillaris</i>        | H | 0 | OTC       | None                     | F1    | (Baxter et al. 1994)       |
| <i>Agrostis capillaris</i>        | H | 0 | GCGH      | None/Fert                | T1    | (Cotrufo & Gorissen 1997)  |
| <i>Agrostis capillaris</i>        | H | 0 | Solardome | None/Fert                | F3/F4 | (Newbery & Wolfenden 1996) |
| <i>Agrostis stolonifera</i>       | H | 0 | GCGH      | None/Fert                | F1    | (Goverde et al. 2002)      |
| <i>Allium cepa</i>                | H | 0 | GCGH      | None                     | T2    | (Jasoni et al. 2004)       |
| <i>Allium cepa</i>                | H | 0 | Fieldcham | None                     | T4    | (Mortensen 1994b)          |
| <i>Alnus glutinosa</i>            | W | 0 | GCGH      | None                     | T1    | (Norby 1987)               |
| <i>Alnus glutinosa</i>            | W | 0 | OTC       | None/Fert                | F1    | (Temperton et al. 2003a)   |
| <i>Alnus glutinosa</i>            | W | 0 | OTC       | None                     | T4    | (Temperton et al. 2003b)   |
| <i>Alnus glutinosa</i>            | W | 0 | OTC       | None                     | T2    | (Vogel et al. 1997)        |
| <i>Alnus rubra</i>                | W | 0 | GCGH      | None/Fert                | T1    | (Arnone & Gordon 1990)     |
| <i>Alnus rubra</i>                | W | 0 | GCGH      | None/Water               | T1    | (Hibbs et al. 1995)        |
| <i>Amaranthus hypochondriacus</i> | H | 0 | GCGH      | None                     | T1    | (Bunce 1990)               |
| <i>Amaranthus hypochondriacus</i> | H | 0 | GCGH      | None                     | T1    | (Ziska & Bunce 1999)       |
| <i>Amaranthus hypochondriacus</i> | H | 0 | GCGH      | None                     | T4    | (Ziska & Bunce 1997a)      |
| <i>Amaranthus retroflexus</i>     | H | 0 | GCGH      | None                     | F1    | (Bazzaz et al. 1989)       |
| <i>Amaranthus retroflexus</i>     | H | 0 | GCGH      | None                     | F1    | (Bernacchi et al. 2000)    |
| <i>Amaranthus retroflexus</i>     | H | 0 | GCGH      | None/SO <sub>2</sub>     | F1/T1 | (Carlson & Bazzaz 1982)    |
| <i>Amaranthus retroflexus</i>     | H | 0 | GCGH      | None                     | F1/F5 | (Coleman & Bazzaz 1992)    |
| <i>Amaranthus retroflexus</i>     | H | 0 | GCGH      | None                     | T1    | (Dippery et al. 1995)      |
| <i>Amaranthus retroflexus</i>     | H | 0 | GCGH      | None                     | F1/F4 | (Tremmel & Patterson 1993) |
| <i>Amaranthus retroflexus</i>     | H | 0 | GCGH      | None                     | T1    | (Ziska & Bunce 1999)       |
| <i>Amaranthus retroflexus</i>     | H | 0 | GCGH      | None                     | T4    | (Ziska & Bunce 1997a)      |
| <i>Ambrosia artemisiifolia</i>    | H | 0 | GCGH      | None                     | T1    | (Ziska & Caulfield 2000)   |
| <i>Amorpha canescens</i>          | H | 1 | FACE      | None                     | T1    | (Reich et al. 2001)        |
| <i>Anana comosus</i>              | H | 0 | GCGH      | None                     | T1    | (Ziska et al. 1991)        |
| <i>Andropogon gerardii</i>        | H | 0 | GCGH      | None                     | F1    | (LeCain & Morgan 1998)     |

|                              |   |   |           |                  |       |                             |
|------------------------------|---|---|-----------|------------------|-------|-----------------------------|
| <i>Andropogon gerardii</i>   | H | 0 | FACE      | None             | T1    | (Reich et al. 2001)         |
| <i>Anemone cylindrica</i>    | H | 0 | FACE      | None             | T1    | (Reich et al. 2001)         |
| <i>Anoda cristata</i>        | H | 0 | GCGH      | None/Temp        | T4    | (Patterson et al. 1988)     |
| <i>Anthoxanthum odoratum</i> | H | 0 | GCGH      | None/Fert        | F1    | (Goverde et al. 2002)       |
| <i>Anthyllis vulneraria</i>  | H | 1 | GCGH      | None             | T1/F4 | (Ferris & Taylor 1993)      |
| <i>Anthyllis vulneraria</i>  | H | 1 | GCGH      | None             | T2    | (Ferris & Taylor 1995)      |
| <i>Antirrhoea trichantha</i> | W | 0 | OTC       | None             | T1    | (Winter & Lovelock 1999)    |
| <i>Apium graveolens</i>      | H | 0 | Fieldcham | None             | T4    | (Mortensen 1994b)           |
| <i>Apium graveolens</i>      | H | 0 | GCGH      | None             | T1    | (Tremblay et al. 1987)      |
| <i>Arabidopsis thaliana</i>  | H | 0 | GCGH      | None             | F3    | (Gibeaut et al. 2001)       |
| <i>Arabidopsis thaliana</i>  | H | 0 | GCGH      | None             | F2    | (Tocquin et al. 2006)       |
| <i>Arabidopsis thaliana</i>  | H | 0 | GCGH      | None/Fert        | F3    | (Zhang & Lechowicz 1995)    |
| <i>Arachis glabrata</i>      | H | 1 | TGG       | None             | T4    | (Fritschi et al. 1999)      |
| <i>Arachis hypogaea</i>      | H | 1 | GCGH      | None/Water       | T2    | (Clifford et al. 1993)      |
| <i>Arrhenatherum elatius</i> | H | 0 | GCGH      | None/Fert        | F1/F3 | (Hunt et al. 1995)          |
| <i>Artemisia absinthium</i>  | H | 0 | GCGH      | None             | F3    | (Smart & Penuelas 2005)     |
| <i>Artemisia tridentata</i>  | H | 0 | GCGH      | None/Fert        | T1/F1 | (Johnson & Lincoln 1991)    |
| <i>Artemisia tridentata</i>  | H | 0 | GCGH      | None             | F3    | (Klironomos et al. 1996)    |
| <i>Artemisia tridentata</i>  | H | 0 | GCGH      | None             | F1/F3 | (Klironomos et al. 1998)    |
| <i>Artemisia tridentata</i>  | H | 0 | GCGH      | None             | F2    | (Lucash et al. 2005)        |
| <i>Asclepias syriaca</i>     | H | 0 | GCGH      | None/Herbivory   | F1/F3 | (Hughes & Bazzaz 2001)      |
| <i>Asclepias syriaca</i>     | H | 0 | FACE      | None             | T1    | (Reich et al. 2001)         |
| <i>Asparagus officinalis</i> | H | 0 | GCGH      | None             | F1    | (Desjardins et al. 1990)    |
| <i>Aster tripolium</i>       | H | 0 | GCGH      | None/Salt        | T1    | (Lenssen et al. 1995)       |
| <i>Avena fatua</i>           | H | 0 | GCGH      | Fert             | F1    | (Tang et al. 2006)          |
| <i>Avena sativa</i>          | H | 0 | GCGH      | None/Infestation | F1    | (Malmstrom & Field 1997)    |
| <i>Avena sativa</i>          | H | 0 | OTC       | None             | T2    | (Saebo & Mortensen 1996)    |
| <i>Beilschmiedia pendula</i> | W | 0 | OTC       | None             | F2    | (Lovelock et al. 1996)      |
| <i>Bellis perennis</i>       | H | 0 | GCGH      | None             | T1    | (Gunn et al. 1999)          |
| <i>Bellis perennis</i>       | H | 0 | Solardome | None/Temp        | F1    | (Stirling et al. 1998)      |
| <i>Beta vulgaris</i>         | H | 0 | GCGH      | None/Fert        | F5    | (Demmers-Derks et al. 1998) |
| <i>Beta vulgaris</i>         | H | 0 | GCGH      | None             | T1    | (Ignatova et al. 2005)      |
| <i>Beta vulgaris</i>         | H | 0 | GCGH      | None/Fert        | T1    | (Romanova et al. 2002)      |

|                              |   |   |          |                     |         |                              |
|------------------------------|---|---|----------|---------------------|---------|------------------------------|
| <i>Beta vulgaris</i>         | H | 0 | GCGH     | None                | F2      | (Sionit et al. 1982)         |
| <i>Beta vulgaris</i>         | H | 0 | GCGH     | None/Fert           | F1      | (Wolf 1998)                  |
| <i>Beta vulgaris</i>         | H | 0 | GCGH     | None                | T2      | (Wyse 1980)                  |
| <i>Beta vulgaris</i>         | H | 0 | GCGH/OTC | None                | T2/T3   | (Ziska et al. 1995)          |
| <i>Betula alleghaniensis</i> | W | 0 | GCGH     | None/Temp/Fert      | T1      | (Bassow et al. 1994)         |
| <i>Betula alleghaniensis</i> | W | 0 | GCGH     | None                | F1      | (Bauer & Berntson 2001)      |
| <i>Betula alleghaniensis</i> | W | 0 | GCGH     | None                | T1      | (Bernston & Bazzaz 1997)     |
| <i>Betula alleghaniensis</i> | W | 0 | GCGH     | None                | T2      | (Berntson et al. 1997)       |
| <i>Betula alleghaniensis</i> | W | 0 | GCGH     | None                | T2      | (Rochefort & Bazzaz 1992)    |
| <i>Betula alleghaniensis</i> | W | 0 | GCGH     | None                | T1      | (Wayne & Bazzaz 1995)        |
| <i>Betula lenta</i>          | W | 0 | GCGH     | None                | T2      | (Rochefort & Bazzaz 1992)    |
| <i>Betula lenta</i>          | W | 0 | GCGH     | None/Fert           | F19/F20 | (Oechel et al. 1984)         |
| <i>Betula papyrifera</i>     | W | 0 | GCGH     | None                | F1/T1   | (Bazzaz et al. 1990)         |
| <i>Betula papyrifera</i>     | W | 0 | GCGH     | None                | T1      | (Godbold et al. 1997)        |
| <i>Betula papyrifera</i>     | W | 0 | GCGH     | None                | T1      | (Parsons et al. 2003)        |
| <i>Betula papyrifera</i>     | W | 0 | GCGH     | None                | T2      | (Rochefort & Bazzaz 1992)    |
| <i>Betula papyrifera</i>     | W | 0 | GCGH     | None/Fert           | F2      | (Zhang et al. 2006)          |
| <i>Betula pendula</i>        | W | 0 | OTC      | None                | T1      | (Centritto 2000)             |
| <i>Betula pendula</i>        | W | 0 | OTC      | None                | T3      | (Kellomaki & Wang 2001)      |
| <i>Betula pendula</i>        | W | 0 | GCGH     | None                | T1      | (Mortensen 1994a)            |
| <i>Betula pendula</i>        | W | 0 | GCGH     | None                | F1/T1   | (Pettersson & McDonald 1992) |
| <i>Betula pendula</i>        | W | 0 | OTC      | None                | F1      | (Rey & Jarvis 1997)          |
| <i>Betula pendula</i>        | W | 0 | OTC      | None/O <sub>3</sub> | T3      | (Riikonen et al. 2004)       |
| <i>Betula pendula</i>        | W | 0 | GCGH     | None                | F1      | (Rouhier & Read 1999)        |
| <i>Betula pendula</i>        | W | 0 | GCGH     | None/Fert           | F1      | (Silvola & Ahlholm 1995)     |
| <i>Betula pendula</i>        | W | 0 | OTC      | None                | T5      | (Wang et al. 1998)           |
| <i>Betula pendulosa</i>      | W | 0 | GCGH     | None/O <sub>3</sub> | T1      | (Kytoviita et al. 1999)      |
| <i>Betula platyphylla</i>    | W | 0 | GCGH     | None/Fert           | F1      | (Kitao et al. 2005)          |
| <i>Betula populifolia</i>    | W | 0 | GCGH     | None /Temp/Fert     | T1      | (Bassow et al. 1994)         |
| <i>Betula populifolia</i>    | W | 0 | GCGH     | None/Water/Flooding | F2      | (Miao et al. 1992)           |
| <i>Betula populifolia</i>    | W | 0 | GCGH     | None                | T2      | (Rochefort & Bazzaz 1992)    |
| <i>Betula pubescens</i>      | W | 0 | GCGH     | None/O <sub>3</sub> | T1/T2   | (Mortensen 1995)             |
| <i>Betula pubescens</i>      | W | 0 | OTC      | None                | T3      | (Mortensen 1998)             |

|                                  |   |   |            |                          |       |                            |
|----------------------------------|---|---|------------|--------------------------|-------|----------------------------|
| <i>Betula pubescens</i>          | W | 0 | OTC        | None                     | T5    | (Vanhatalo et al. 2003)    |
| <i>Bouteloua curtipendula</i>    | H | 0 | GCGH       | None/Fert/O <sub>3</sub> | F3/T2 | (Volin & Reich 1996)       |
| <i>Bouteloua eriopoda</i>        | H | 0 | GCGH       | None                     | F1    | (BassiriRad et al. 1997b)  |
| <i>Bouteloua gracilis</i>        | H | 0 | GCGH       | None                     | T1    | (Hunt et al. 1996)         |
| <i>Bouteloua gracilis</i>        | H | 0 | GCGH       | None                     | F1    | (LeCain & Morgan 1998)     |
| <i>Bouteloua gracilis</i>        | H | 0 | GCGH       | None                     | F2    | (Morgan et al. 1994)       |
| <i>Bouteloua gracilis</i>        | H | 0 | GCGH       | None                     | F1    | (Read & Morgan 1996)       |
| <i>Bouteloua gracilis</i>        | H | 0 | FACE       | None                     | T1    | (Reich et al. 2001)        |
| <i>Brassica campestris</i>       | H | 0 | OTC        | None/Water               | T5    | (Mishra et al. 1999)       |
| <i>Brassica campestris</i>       | H | 0 | OTC        | None/Water               | T4    | (Uprety et al. 1995)       |
| <i>Brassica carinata</i>         | H | 0 | OTC        | None/Water               | T5    | (Mishra et al. 1999)       |
| <i>Brassica carinata</i>         | H | 0 | OTC        | None/Water               | T4    | (Uprety et al. 1995)       |
| <i>Brassica juncea</i>           | H | 0 | OTC        | None/Water               | T5    | (Mishra et al. 1999)       |
| <i>Brassica juncea</i>           | H | 0 | GCGH       | None/Pollution           | T2    | (Tang et al. 2003)         |
| <i>Brassica juncea</i>           | H | 0 | OTC        | None/Water               | T4    | (Uprety et al. 1995)       |
| <i>Brassica juncea</i>           | H | 0 | OTC        | None/Fert                | T4    | (Uprety & Mahalaxmi 2000)  |
| <i>Brassica napus</i>            | H | 0 | GCGH       | None/Water/Temp          | F2    | (Qaderi et al. 2006)       |
| <i>Brassica napus</i>            | H | 0 | OTC        | None/Water               | T5    | (Mishra et al. 1999)       |
| <i>Brassica napus</i>            | H | 0 | OTC        | None/Water               | T4    | (Uprety et al. 1995)       |
| <i>Bromus erectus</i>            | H | 0 | GCGH       | None                     | T2    | (Roumet et al. 2000)       |
| <i>Bromus inermis</i>            | H | 0 | FACE       | None                     | T1    | (Reich et al. 2001)        |
| <i>Bromus madritensis</i>        | H | 0 | GCGH       | None                     | F1    | (Huxman et al. 1999)       |
| <i>Bromus madritensis</i>        | H | 0 | GCGH       | None                     | T2    | (Roumet et al. 2000)       |
| <i>Bromus madritensis-rubens</i> | H | 0 | GCGH       | None                     | T2    | (Yoder et al. 2000)        |
| <i>Bromus mollis</i>             | H | 0 | GCGH       | None/Fert                | F1    | (Larigauderie et al. 1988) |
| <i>Bromus rubens</i>             | H | 0 | GCGH       | None                     | F2    | (Huxman et al. 1998)       |
| <i>Bromus sterilis</i>           | H | 0 | Solar dome | None                     | F1    | (Stirling et al. 1998)     |
| <i>Bromus willdenowii</i>        | H | 0 | GCGH       | None                     | T1    | (Laing et al. 2002)        |
| <i>Buchloe dactyloides</i>       | H | 0 | GCGH       | None                     | F1    | (LeCain & Morgan 1998)     |
| <i>Calamagrostis epigejos</i>    | H | 0 | GCGH       | None                     | F4    | (Gloser & Bartak 1994)     |
| <i>Callophyllum longifolium</i>  | W | 0 | OTC        | None                     | T1    | (Winter & Lovelock 1999)   |
| <i>Calluna vulgaris</i>          | W | 0 | GCGH       | None/Fert                | F2    | (Whitehead et al. 1997)    |
| <i>Capsicum annuum</i>           | H | 0 | GCGH       | None                     | T1    | (Fierro et al. 1994)       |

|                                   |   |   |           |                      |         |                                   |
|-----------------------------------|---|---|-----------|----------------------|---------|-----------------------------------|
| <i>Capsicum annuum</i>            | H | 0 | GCGH      | None                 | F1      | (Penuelas et al. 1995)            |
| <i>Caragana intermedia</i>        | W | 0 | GCGH      | None/Water           | F3      | (Xiao et al. 2005)                |
| <i>Carex bigelowii</i>            | H | 0 | GCGH      | None/Fert            | F19/F20 | (Oechel et al. 1984)              |
| <i>Carpinus betulus</i>           | W | 0 | OTC       | None                 | F3      | (Hattenschwiler & Körner 2003)    |
| <i>Cassia obtusifolia</i>         | H | 1 | GCGH      | None                 | T2      | (Farnsworth & Bazzaz 1995)        |
| <i>Cassia obtusifolia</i>         | H | 1 | GCGH      | None/Fert            | T1      | (Patterson & Flint 1982)          |
| <i>Cassia obtusifolia</i>         | H | 1 | GCGH      | None                 | T4      | (Thomas et al. 1999)              |
| <i>Cassia obtusifolia</i>         | H | 1 | GCGH      | None                 | F1/F4   | (Tremmel & Patterson 1993)        |
| <i>Castanea sativa</i>            | W | 0 | GCGH      | None                 | T1      | (El Kohen et al. 1993)            |
| <i>Castanea sativa</i>            | W | 0 | GCGH      | None/Fert            | T1      | (El Kohen & Mousseau 1994)        |
| <i>Castanea sativa</i>            | W | 0 | GCGH      | None/Fert            | F1      | (Kohen et al. 1992)               |
| <i>Castanea sativa</i>            | W | 0 | GCGH      | None/Fert            | F1      | (El Kohen et al. 1992)            |
| <i>Castanea sativa</i>            | W | 0 | OTC       | None                 | T2      | (Mousseau 1993)                   |
| <i>Castanea sativa</i>            | W | 0 | GCGH      | None                 | T3      | (Mousseau & Enoch 1989)           |
| <i>Castilla elastica</i>          | W | 0 | OTC       | None                 | T1      | (Winter & Lovelock 1999)          |
| <i>Cecropia longipes</i>          | W | 0 | OTC       | None                 | T1      | (Winter & Lovelock 1999)          |
| <i>Cecropia obtusifolia</i>       | W | 0 | GCGH      | None                 | F1      | (Reekie & Bazzaz 1989)            |
| <i>Cedrela odorata</i>            | W | 0 | OTC       | None                 | F2      | (Carswell et al. 2000)            |
| <i>Cedrus atlantica</i>           | W | 0 | GCGH      | None                 | T3      | (Kaushal et al. 1989)             |
| <i>Centaurea maculosa</i>         | H | 0 | GCGH      | None                 | T3      | (Ziska 2003)                      |
| <i>Centaurea solstitialis</i>     | H | 0 | GCGH      | None                 | T3      | (Ziska 2003)                      |
| <i>Ceratonia siliqua</i>          | W | 1 | GCGH      | None                 | F1      | (Cruz et al. 1997)                |
| <i>Chenopodium album</i>          | W | 0 | GCGH      | None                 | F1      | (Bernacchi et al. 2000)           |
| <i>Chenopodium album</i>          | H | 0 | GCGH      | None/SO <sub>2</sub> | F1/T1   | (Carlson & Bazzaz 1982)           |
| <i>Chenopodium album</i>          | H | 0 | Solardome | None                 | F1      | (Stirling et al. 1998)            |
| <i>Chrysanthemum x morifolium</i> | H | 0 | GCGH      | None                 | T1      | (Gislerod & Nelson 1989)          |
| <i>Cirsium arvense</i>            | H | 0 | GCGH      | None                 | T3      | (Ziska 2003)                      |
| <i>Cirsium arvense</i>            | H | 0 | OTC       | None                 | F1      | (Ziska et al. 2004)               |
| <i>Citrus aurantium</i>           | W | 0 | GCGH      | None                 | F2      | (Ferguson et al. 1986)            |
| <i>Citrus aurantium</i>           | W | 0 | GCGH      | None/Fert            | T1      | (Syvertsen & Graham 1999)         |
| <i>Citrus reticulata</i>          | W | 0 | GCGH      | None/Salt            | T1      | (Garcia-Sanchez & Syvertsen 2006) |
| <i>Citrus sinensis</i>            | W | 0 | GCGH      | None                 | T1      | (Downton et al. 1987)             |
| <i>Citrus sinensis</i>            | W | 0 | GCGH      | None/Fert            | T1      | (Syvertsen & Graham 1999)         |

|                                                          |     |   |           |                     |       |                                   |
|----------------------------------------------------------|-----|---|-----------|---------------------|-------|-----------------------------------|
| <i>Citrus sinensis x Poncirus trifoliata</i>             | W   | 0 | GCGH      | None/Salt           | T1    | (Garcia-Sanchez & Syvertsen 2006) |
| Community( <i>Herb assemblage</i> )                      | H   | 0 | GCGH      | None                | F1    | (Bazzaz et al. 1989)              |
| Community( <i>Herb assemblage</i> )                      | H   | 0 | GCGH      | None                | F2    | (Berntson et al. 1998)            |
| Community ( <i>Tree assemblage</i> )                     | W   | 0 | OTC       | None/Light          | T1    | (Hattenschwiler 2001)             |
| Community ( <i>Grassland</i> )                           | H   | 1 | GCGH      | None                | F1    | (Leadley & Stocklin 1996)         |
| Community( <i>Herb-tree mixture</i> )                    | H/W | 0 | GCGH      | None                | T2    | (Arnone & Körner 1995)            |
| Community( <i>Forest mesocosm</i> )                      | W   | 0 | GCGH      | None                | T1    | (Bernston & Bazzaz 1998)          |
| Community( <i>Tree assemblage</i> )                      | W   | 0 | FACE      | None/Fert           | T1    | (Bucher et al. 1998)              |
| Community( <i>Herb assemblage</i> )                      | H   | 0 | GCGH      | None                | F1    | (Carter & Peterson 1983)          |
| Community( <i>C<sub>3</sub>-C<sub>4</sub> mixtures</i> ) | H   | 0 | FACE      | None                | T2    | (Derner et al. 2003)              |
| Community( <i>California grassland</i> )                 | H   | 0 | FACE      | None/Fert           | F4/F5 | (Dukes et al. 2005)               |
| Community( <i>Grassland</i> )                            | H   | 1 | GCGH      | None/Fert           | F2    | (Edwards et al. 2005)             |
| Community( <i>Forest model ecosystems</i> )              | W   | 0 | OTC       | None/Fert           | F2    | (Egli & Körner 1997)              |
| Community( <i>Grassland</i> )                            | H   | 0 | Solardome | None                | F1    | (Fitter et al. 1997)              |
| Community( <i>Herb-Wood Mixture</i> )                    | H/W | 0 | GCGH      | None                | T1/T4 | (Gavazzi et al. 2000)             |
| Community( <i>Mediterranean grassland</i> )              | H   | 1 | GCGH      | None                | T2    | (Grunzweig & Körner 2001)         |
| Community( <i>Mediterranean grassland</i> )              | H   | 1 | GCGH      | None/Fert           | F1    | (Grunzweig & Körner 2003)         |
| Community( <i>Herbaceous community</i> )                 | H   | 0 | GCGH      | None/Fert           | T2    | (Hartz-Rubin & DeLucia 2001)      |
| Community( <i>Bog community</i> )                        | H   | 0 | mini-FACE | None                | T2/T3 | (Heijmans et al. 2001)            |
| Community ( <i>California Grassland</i> )                | H   | 0 | FACE      | None                | F1    | (Henry et al. 2006)               |
| Community( <i>California grassland</i> )                 | H   | 1 | mini-FACE | None                | T1    | (Higgins et al. 2002)             |
| Community( <i>Tree assemblage</i> )                      | W   | 0 | FACE      | None                | F1    | (King et al. 2005)                |
| Community( <i>Grassland</i> )                            | H   | 1 | OTC       | None/Fert           | F1    | (Körner et al. 1997)              |
| Community( <i>Grassland</i> )                            | H   | 1 | SACC      | None                | F2    | (Leadley et al. 1999)             |
| Community( <i>Herb assemblage</i> )                      | H   | 1 | Tunnels   | None                | F7    | (Lilley et al. 2001)              |
| Community( <i>Tree assemblages</i> )                     | W   | 0 | GCGH      | None/O <sub>3</sub> | T2    | (Liu et al. 2004)                 |
| Community( <i>Tree assemblages</i> )                     | W   | 0 | OTC       | None                | T2/T3 | (Lovelock et al. 1998)            |
| Community( <i>Grassland</i> )                            | H   | 1 | GCGH      | None/Fert           | F1    | (Maestre et al. 2005)             |
| Community ( <i>Model grassland</i> )                     | H   | 0 | GCGH      | None/Fert           | F1    | (Maestre & Reynolds 2006)         |
| Community( <i>Tallgrass prairie</i> )                    | H   | 0 | CTC       | None                | T1    | (Mo et al. 1992)                  |
| Community( <i>Old-field microcosms</i> )                 | H   | 1 | GCGH      | None                | F5    | (Navas et al. 1995)               |
| Community( <i>Pasture turves</i> )                       | H   | 1 | GCGH      | None                | T2    | (Newton et al. 1994)              |
| Community( <i>Grassland</i> )                            | H   | 0 | mini-FACE | None                | T1    | (Niklaus et al. 2001)             |

|                                                              |     |   |           |                      |       |                          |
|--------------------------------------------------------------|-----|---|-----------|----------------------|-------|--------------------------|
| <i>Community(Tallgrass prairie)</i>                          | H   | 0 | OTC       | None                 | F3/F5 | (Owensby et al. 1999)    |
| <i>Community(Tallgrass prairie)</i>                          | H   | 0 | OTC       | None                 | F3/F4 | (Owensby et al. 1993)    |
| <i>Community(Semi-arid grassland)</i>                        | H   | 0 | OTC       | None                 | F1    | (Pendall et al. 2004)    |
| <i>Community (Pine community)</i>                            | H/W | 1 | OTC       | None                 | F1    | (Runion et al. 2006)     |
| <i>Community(Alpine grassland)</i>                           | H   | 0 | OTC       | None/Fert            | F2    | (Schappi & Körner 1996)  |
| <i>Community(Grassland)</i>                                  | H   | 1 | GCGH      | None/Fert            | F1/F4 | (Stocklin et al. 1998)   |
| <i>Community(Forest)</i>                                     | W   | 0 | OTC       | None/Temp            | F4/F5 | (Wan et al. 2004)        |
| <i>Community(Herb assemblage)</i>                            | H   | 0 | GCGH      | None                 | F1    | (Wilsey et al. 1997)     |
| <i>Community(Tree assemblage)</i>                            | W   | 0 | OTC       | None                 | T2    | (Winter et al. 2000)     |
| <i>Community(Tree assemblage)</i>                            | H   | 0 | OTC       | None                 | T1    | (Winter et al. 2001)     |
| <i>Community(C<sub>3</sub>-C<sub>4</sub> grass mixtures)</i> | H   | 0 | GCGH      | None/Fert            | F2/F4 | (Wong & Osmond 1991)     |
| <i>Convolvulus arvensis</i>                                  | H   | 0 | GCGH      | None                 | T3    | (Ziska 2003)             |
| <i>Copaifera aromatica</i>                                   | W   | 1 | GCGH      | None/Defoliation     | T1    | (Lovelock et al. 1999)   |
| <i>Crotalaria spectabilis</i>                                | H   | 1 | GCGH      | None/Fert            | T1    | (Patterson & Flint 1982) |
| <i>Cynodon dactylon</i>                                      | H   | 0 | GCGH      | None                 | T1    | (Paterson et al. 1996)   |
| <i>Dactylis glomerata</i>                                    | H   | 0 | GCGH      | None                 | T1    | (Gunn et al. 1999)       |
| <i>Dactylis glomerata</i>                                    | H   | 0 | GCGH      | None                 | T4    | (Thomas et al. 1999)     |
| <i>Dactylus glomerata</i>                                    | H   | 0 | GCGH      | None/Fert            | F1    | (Harmens et al. 2000)    |
| <i>Dactylus glomerata</i>                                    | H   | 0 | GCGH      | None/Temp            | T1    | (Ziska & Bunce 1994)     |
| <i>Danthonia richardsonii</i>                                | H   | 0 | GCGH      | None/Stress          | F1    | (Barrett & Gifford 1999) |
| <i>Datura stramonium</i>                                     | H   | 0 | GCGH      | None/SO <sub>2</sub> | F1/T1 | (Carlson & Bazzaz 1982)  |
| <i>Daucus carota</i>                                         | H   | 0 | Fieldcham | None                 | T4    | (Mortensen 1994b)        |
| <i>Daucus carota</i>                                         | H   | 0 | Tunnel    | None                 | F2    | (Wheeler et al. 1994)    |
| <i>Desmodium paniculatum</i>                                 | H   | 1 | GCGH      | None                 | T1    | (Wulff & Strain 1982)    |
| <i>Digitaria ciliaris</i>                                    | H   | 0 | GCGH      | None                 | T1/T7 | (Patterson 1986)         |
| <i>Doryphora sassafras</i>                                   | W   | 0 | GCGH      | None                 | T1    | (Roden et al. 1997)      |
| <i>Echinochloa crusgalli</i>                                 | H   | 0 | GCGH      | None                 | T1/T7 | (Patterson 1986)         |
| <i>Echinochloa crusgalli</i>                                 | H   | 0 | GCGH      | Fert                 | F1    | (Tang et al. 2006)       |
| <i>Echinochloa crusgalli</i>                                 | H   | 0 | GCGH      | None                 | T4    | (Ziska & Bunce 1997a)    |
| <i>Echinochloa frumentacea</i>                               | H   | 0 | GCGH      | None/Fert            | F2/F4 | (Wong & Osmond 1991)     |
| <i>Echium plantagineum</i>                                   | H   | 0 | GCGH      | None                 | F2    | (Johns & Hughes 2002)    |
| <i>Elaeagnus angustifolia</i>                                | W   | 1 | GCGH      | None                 | T1    | (Norby 1987)             |
| <i>Eleusine indica</i>                                       | H   | 0 | GCGH      | None                 | T1/T7 | (Patterson 1986)         |

|                                |   |   |      |                     |         |                             |
|--------------------------------|---|---|------|---------------------|---------|-----------------------------|
| <i>Eleusine indica</i>         | H | 0 | GCGH | Fert                | F1      | (Tang et al. 2006)          |
| <i>Elymus athericus</i>        | H | 0 | GCGH | None/Salt           | F1      | (Lenssen et al. 1993)       |
| <i>Elymus athericus</i>        | H | 0 | GCGH | None/UVB            | T1      | (van de Staaij et al. 1993) |
| <i>Elymus elymoides</i>        | H | 0 | GCGH | None                | F2      | (Lucash et al. 2005)        |
| <i>Elytrigia repens</i>        | H | 0 | GCGH | None                | F1/F4   | (Tremmel & Patterson 1993)  |
| <i>Eriophorum vaginatum</i>    | H | 0 | GCGH | None                | F1      | (BassiriRad et al. 1996b)   |
| <i>Eriophorum vaginatum</i>    | H | 0 | GCGH | None/Fert           | F19/F20 | (Oechel et al. 1984)        |
| <i>Eucalyptus cladocalyx</i>   | W | 0 | GCGH | None/Fert           | T1      | (Gleadow et al. 1998)       |
| <i>Eucalyptus grandis</i>      | W | 0 | GCGH | None                | T1      | (Conroy et al. 1992)        |
| <i>Eucalyptus macrorhyncha</i> | W | 0 | GCGH | None/Water          | T1      | (Roden & Ball 1996a)        |
| <i>Eucalyptus macrorhyncha</i> | W | 0 | GCGH | None                | F1      | (Roden & Ball 1996b)        |
| <i>Eucalyptus miniata</i>      | W | 0 | TENT | None                | T1      | (Duff et al. 1994)          |
| <i>Eucalyptus pauciflora</i>   | W | 0 | GCGH | None                | T2      | (Roden et al. 1999)         |
| <i>Eucalyptus rossii</i>       | W | 0 | GCGH | None/Water          | T1      | (Roden & Ball 1996a)        |
| <i>Eucalyptus rossii</i>       | W | 0 | GCGH | None                | F1      | (Roden & Ball 1996b)        |
| <i>Eucalyptus tetradonta</i>   | W | 0 | TENT | None                | T1      | (Duff et al. 1994)          |
| <i>Euphorbia esula</i>         | H | 0 | GCGH | None                | T3      | (Ziska 2003)                |
| <i>Fagus</i>                   | W | 0 | GCGH | None                | T2      | (Overdieck 1993)            |
| <i>Fagus grandifolia</i>       | W | 0 | GCGH | None                | F1/T1   | (Bazzaz et al. 1990)        |
| <i>Fagus sylvatica</i>         | W | 0 | GCGH | None                | T2      | (El Kohen et al. 1993)      |
| <i>Fagus sylvatica</i>         | W | 0 | GCGH | None/O <sub>3</sub> | T2      | (Liu et al. 2004)           |
| <i>Ferocactus acanthodes</i>   | H | 0 | GCGH | None                | F2      | (Nobel & Hartsock 1986)     |
| <i>Festuca arundinacea</i>     | H | 0 | GCGH | None                | T1      | (Laing et al. 2002)         |
| <i>Festuca elatior</i>         | H | 0 | GCGH | None                | F1      | (Carter & Peterson 1983)    |
| <i>Festuca ovina</i>           | H | 0 | GCGH | None/Fert           | T1      | (Cotrufo & Gorissen 1997)   |
| <i>Festuca ovina</i>           | H | 0 | GCGH | None/Fert           | F1/F3   | (Hunt et al. 1995)          |
| <i>Festuca pratensis</i>       | H | 0 | OTC  | None                | F3      | (Hakala & Mela 1996)        |
| <i>Festuca pratensis</i>       | H | 0 | GCGH | None                | F3      | (Smart & Penuelas 2005)     |
| <i>Festuca rubra</i>           | H | 0 | GCGH | None                | F6      | (Barnard et al. 2004)       |
| <i>Festuca rubra</i>           | H | 0 | GCGH | None/Fert           | F1      | (Goverde et al. 2002)       |
| <i>Festuca rubra</i>           | H | 0 | GCGH | None/Fert           | F1/F3   | (Hunt et al. 1995)          |
| <i>Festuca vivipara</i>        | H | 0 | OTC  | None                | F1      | (Baxter et al. 1994)        |
| <i>Ficus insipida</i>          | W | 0 | OTC  | None                | T1      | (Winter & Lovelock 1999)    |

|                               |   |   |      |                            |       |                                |
|-------------------------------|---|---|------|----------------------------|-------|--------------------------------|
| <i>Ficus obtusifolia</i>      | W | 0 | GCGH | None                       | T1    | (Ziska et al. 1991)            |
| <i>Flaveria trinervia</i>     | H | 0 | GCGH | None                       | T3    | (Ziska et al. 1999)            |
| <i>Fragaria ananassa</i>      | H | 0 | GCGH | None/Fert                  | T3    | (Chen & Lenz 1997)             |
| <i>Fragaria ananassa</i>      | H | 0 | GCGH | None/Fert                  | T1    | (Deng & Woodward 1998)         |
| <i>Fragaria x ananassa</i>    | H | 0 | GCGH | None                       | F3    | (Chen et al. 1997)             |
| <i>Fraxinus excelsior</i>     | W | 0 | OTC  | None/O <sub>3</sub> /Water | F2    | (Broadmeadow & Jackson 2000)   |
| <i>Fraxinus excelsior</i>     | W | 0 | OTC  | None                       | F3    | (Hattenschwiler & Körner 2003) |
| <i>Fraxinus pennsylvanica</i> | W | 0 | GCGH | None                       | T5    | (Loats & Rebbeck 1999)         |
| <i>Garcinia mangostana</i>    | W | 0 | GCGH | None                       | T1    | (Downton et al. 1990)          |
| <i>Gliricidia sepium</i>      | W | 1 | GCGH | None/Fert                  | F1    | (Thomas et al. 1991)           |
| <i>Gliricidia sepium</i>      | W | 1 | GCGH | None/Fert                  | T1    | (Thomas et al. 2000)           |
| <i>Gliricidia sepium</i>      | W | 1 | GCGH | None                       | F1    | (Tissue et al. 1997)           |
| <i>Glycine max</i>            | H | 1 | GCGH | None                       | T7    | (Allen et al. 1988)            |
| <i>Glycine max</i>            | H | 1 | OTC  | None                       | T1    | (Amthor et al. 1994)           |
| <i>Glycine max</i>            | H | 1 | GCGH | None/Light                 | T2    | (Bacanamwo & Harper 1997)      |
| <i>Glycine max</i>            | H | 1 |      | None/O <sub>3</sub>        | T3    | (Booker & Fiscus 2005)         |
| <i>Glycine max</i>            | H | 1 | GCGH | None                       | T1    | (Bunce 1990)                   |
| <i>Glycine max</i>            | H | 1 | GCGH | None                       | F4    | (Cen & Layzell 2004)           |
| <i>Glycine max</i>            | H | 1 | GCGH | None                       | F2    | (Cure et al. 1987)             |
| <i>Glycine max</i>            | H | 1 | GCGH | None/Fert                  | T1/F6 | (Cure et al. 1988)             |
| <i>Glycine max</i>            | H | 1 | OTC  | None                       | T4    | (Gupta & Li 1994)              |
| <i>Glycine max</i>            | H | 1 | OTC  | None                       | T3    | (Heagle et al. 1999a)          |
| <i>Glycine max</i>            | H | 1 | GCGH | None/Fert                  | T1    | (Israel et al. 1990)           |
| <i>Glycine max</i>            | H | 1 | OTC  | None                       | T1    | (Jones et al. 1984)            |
| <i>Glycine max</i>            | H | 1 | OTC  | None/Fert                  | T1    | (Li & Gupta 1993)              |
| <i>Glycine max</i>            | H | 1 | OTC  | None/O <sub>3</sub>        | T2    | (Miller et al. 1998)           |
| <i>Glycine max</i>            | H | 1 | GCGH | None                       | T2    | (Nakamoto et al. 2004)         |
| <i>Glycine max</i>            | H | 1 | GCGH | None                       | T1/T3 | (Patterson & Flint 1980)       |
| <i>Glycine max</i>            | H | 1 | GCGH | None                       | T1/T7 | (Patterson 1986)               |
| <i>Glycine max</i>            | H | 1 | GCGH | None/Fert                  | T1    | (Patterson & Flint 1982)       |
| <i>Glycine max</i>            | H | 1 | GCGH | None                       | T1    | (Rogers et al. 1992)           |
| <i>Glycine max</i>            | H | 1 | GCGH | None                       | F1/F2 | (Rufty et al. 1981)            |
| <i>Glycine max</i>            | H | 1 | GCGH | None/Fert                  | T1    | (Sa 1997)                      |

|                                 |   |   |      |                |       |                                |
|---------------------------------|---|---|------|----------------|-------|--------------------------------|
| <i>Glycine max</i>              | H | 1 | GCGH | None/Water     | T1/T2 | (Serraj et al. 1999)           |
| <i>Glycine max</i>              | H | 1 | GCGH | None           | F1    | (Sicher et al. 1995)           |
| <i>Glycine max</i>              | H | 1 | GCGH | None/Temp      | F1    | (Sionit et al. 1987)           |
| <i>Glycine max</i>              | H | 1 | GCGH | None           | F2    | (Sionit et al. 1982)           |
| <i>Glycine max</i>              | H | 1 | GCGH | None/Fert      | T1    | (Sionit 1983)                  |
| <i>Glycine max</i>              | H | 1 | GCGH | None           | F1/F4 | (Tremmel & Patterson 1993)     |
| <i>Glycine max</i>              | H | 1 | GCGH | None/Fert      | T1    | (Williams et al. 1981)         |
| <i>Glycine max</i>              | H | 1 | GCGH | None           | T1    | (Xu et al. 1994)               |
| <i>Glycine max</i>              | H | 1 | GCGH | None/Temp      | T2    | (Ziska & Bunce 1997b)          |
| <i>Glycine max</i>              | H | 1 | GCGH | None/Temp      | T3    | (Ziska & Bunce 1995)           |
| <i>Glycine max</i>              | H | 1 | GCGH | None           | T3    | (Ziska et al. 2001)            |
| <i>Gnaphalium affine</i>        | H | 0 | GCGH | Fert           | F1    | (Tang et al. 2006)             |
| <i>Gossypium hirsutum</i>       | H | 0 | GCGH | None           | F1    | (Delucia et al. 1985)          |
| <i>Gossypium hirsutum</i>       | H | 0 | OTC  | None           | T2/T3 | (Heagle et al. 1999b)          |
| <i>Gossypium hirsutum</i>       | H | 0 | FACE | None           | F1/F2 | (Hendrix et al. 1994)          |
| <i>Gossypium hirsutum</i>       | H | 0 | GCGH | None/Water     | T2    | (Kang et al. 2002)             |
| <i>Gossypium hirsutum</i>       | H | 0 | OTC  | None/Water     | T3    | (Kimball & Mauney 1993)        |
| <i>Gossypium hirsutum</i>       | H | 0 | GCGH | None/Temp      | T4    | (Patterson et al. 1988)        |
| <i>Gossypium hirsutum</i>       | H | 0 | FACE | None           | T3/T4 | (Prior et al. 1994)            |
| <i>Gossypium hirsutum</i>       | H | 0 | FACE | None           | T1    | (Prior et al. 1998)            |
| <i>Gossypium hirsutum</i>       | H | 0 | SPAR | None/Fert      | T4    | (Reddy et al. 2004)            |
| <i>Gossypium hirsutum</i>       | H | 0 | SPAR | None/Temp      | T1    | (Reddy et al. 1998)            |
| <i>Gossypium hirsutum</i>       | H | 0 | GCGH | None           | F8    | (Reddy et al. 1995)            |
| <i>Gossypium hirsutum</i>       | H | 0 | SPAR | None           | F1    | (Reddy et al. 1997)            |
| <i>Gossypium hirsutum</i>       | H | 0 | GCGH | None/Water     | F5/F6 | (Samarakoon & Gifford 1996)    |
| <i>Gossypium hirsutum</i>       | H | 0 | GCGH | None           | F1    | (Thomas & Strain 1991)         |
| <i>Gossypium hirsutum</i>       | H | 0 | FACE | None           | T1    | (Wood et al. 1994)             |
| <i>Gossypium hirsutum</i>       | H | 0 | GCGH | None/Fert      | T1    | (Yong et al. 2000)             |
| <i>Gossypium hirsutum</i>       | H | 0 | SPAR | None           | T5    | (Zhao et al. 2003)             |
| <i>Gutierrezia microcephala</i> | H | 0 | GCGH | None           | F4    | (Polley et al. 1999a)          |
| <i>Gutierrezia sarothrae</i>    | H | 0 | GCGH | None/Fert      | F1    | (Rillig et al. 1997)           |
| <i>Hedera helix</i>             | H | 0 | OTC  | None           | F3    | (Hattenschwiler & Körner 2003) |
| <i>Helianthus annuus</i>        | H | 0 | GCGH | None/Pollution | T2    | (Tang et al. 2003)             |

|                                 |   |   |      |            |         |                                |
|---------------------------------|---|---|------|------------|---------|--------------------------------|
| <i>Heterotheca subaxillaris</i> | H | 0 | GCGH | None       | F1/T1   | (Johnson & Lincoln 2000)       |
| <i>Holcus lanatus</i>           | H | 0 | GCGH | None       | F2      | (Barnard et al. 2004)          |
| <i>Holcus lanatus</i>           | H | 0 | OTC  | None       | F1      | (Barnard et al. 2005)          |
| <i>Holcus lanatus</i>           | H | 0 | GCGH | None       | T1      | (Barnard et al. 2006)          |
| <i>Hordeum distichum</i>        | H | 0 | GCGH | None       | F2/F4   | (Hibberd et al. 1996)          |
| <i>Hordeum distichum</i>        | H | 0 | GCGH | None/Fert  | T1      | (Martin-Olmedo et al. 2002)    |
| <i>Hordeum vulgare</i>          | H | 0 | GCGH | None/Fert  | F4      | (Kleemola et al. 1994)         |
| <i>Hordeum vulgare</i>          | H | 0 | OTC  | None       | T2      | (Saebo & Mortensen 1996)       |
| <i>Hordeum vulgare</i>          | H | 0 | GCGH | None/Fert  | F1      | (Sicher 2005)                  |
| <i>Ilex aquifolium</i>          | W | 0 | OTC  | None       | F3      | (Hattenschwiler & Körner 2003) |
| <i>Ipomoea batatas</i>          | H | 0 | GCGH | None       | T2      | (Bhattacharya et al. 1985a)    |
| <i>Ipomoea batatas</i>          | H | 0 | OTC  | None/Water | T1      | (Bhattacharya et al. 1990)     |
| <i>Ipomoea hederacea</i>        | H | 0 | GCGH | None       | T2      | (Farnsworth & Bazzaz 1995)     |
| <i>Ipomoea lacunosa</i>         | H | 0 | GCGH | None       | T2      | (Farnsworth & Bazzaz 1995)     |
| <i>Ipomoea purpurea</i>         | H | 0 | GCGH | None       | T2      | (Farnsworth & Bazzaz 1995)     |
| <i>Kalanchoe pinnata</i>        | H | 0 | OTC  | None       | F2      | (Winter et al. 1997)           |
| <i>Kielmeyera coriacea</i>      | W | 0 | GCGH | None       | F1      | (Hoffmann et al. 2000)         |
| <i>Koeleria cristata</i>        | H | 0 | FACE | None       | T1      | (Reich et al. 2001)            |
| <i>Kummerowia struata</i>       | H | 1 | GCGH | Fert       | F1      | (Tang et al. 2006)             |
| <i>Lactuca sativa</i>           | H | 0 | GCGH | None       | T1      | (Knight & Mitchell 1988)       |
| <i>Lamium galeobdolon</i>       | H | 0 | GCGH | None       | F1      | (Reining 1995)                 |
| <i>Larix kaempferi</i>          | W | 0 | GCGH | None/Fert  | T1      | (Yazaki et al. 2004)           |
| <i>Larix leptolepis</i>         | W | 0 | GCGH | None       | T4      | (Mortensen 1994c)              |
| <i>Larix sibirica</i>           | W | 0 | GCGH | None       | T4      | (Mortensen 1994c)              |
| <i>Larrea tridentata</i>        | W | 0 | GCGH | None       | F1      | (BassiriRad et al. 1997b)      |
| <i>Larrea tridentata</i>        | W | 0 | GCGH | None       | T2      | (Obrist & Arnone III 2003)     |
| <i>Ledum palustre</i>           | W | 0 | GCGH | None/Fert  | F19/F20 | (Oechel et al. 1984)           |
| <i>Lespedeza capitata</i>       | H | 1 | FACE | None       | T1      | (Reich et al. 2001)            |
| <i>Linum usitatissimum</i>      | H | 0 | GCGH | None       | F1      | (Arnone & Kestenholz 1997)     |
| <i>Liquidambar occidentalis</i> | W | 0 | OTC  | None/Water | F1      | (Tschapliniski et al. 1995)    |
| <i>Liquidambar styraciflua</i>  | W | 0 | GCGH | None       | T1      | (Sionit et al. 1985)           |
| <i>Liquidambar styraciflua</i>  | W | 0 | GCGH | None       | T1      | (Tolley & Strain 1984a)        |
| <i>Liquidambar styraciflua</i>  | W | 0 | GCGH | None       | T2/T3   | (Tolley & Strain 1984b)        |

|                                |   |   |      |            |       |                            |
|--------------------------------|---|---|------|------------|-------|----------------------------|
| <i>Liriodendron tulipifera</i> | W | 0 | GCGH | None       | T6    | (Loats & Rebbeck 1999)     |
| <i>Liriodendron tulipifera</i> | W | 0 | OTC  | None       | F2    | (Norby et al. 1992)        |
| <i>Liriodendron tulipifera</i> | W | 0 | GCGH | None/Fert  | T3    | (Norby & O'Neil 1991)      |
| <i>Liriodendron tulipifera</i> | W | 0 | GCGH | None       | T1    | (O'Neill et al. 1987a)     |
| <i>Lolium multiflorum</i>      | H | 0 | GCGH | None       | T1    | (Laing et al. 2002)        |
| <i>Lolium multiflorum</i>      | H | 0 | GCGH | None       | T4    | (Thomas et al. 1999)       |
| <i>Lolium perenne</i>          | H | 0 | GCGH | None/Fert  | F3    | (Allard et al. 2006)       |
| <i>Lolium perenne</i>          | H | 0 | FACE | None/Fert  | T1    | (Bazot et al. 2006)        |
| <i>Lolium perenne</i>          | H | 0 | GCGH | None/Fert  | T1    | (Cotrufo & Gorissen 1997)  |
| <i>Lolium perenne</i>          | H | 0 | FACE | None/Fert  | F1    | (Daepf et al. 2001)        |
| <i>Lolium perenne</i>          | H | 0 | GCGH | None       | T3    | (van Ginkel et al. 1996)   |
| <i>Lolium perenne</i>          | H | 0 | GCGH | None       | F1/F2 | (Gloser et al. 2001)       |
| <i>Lolium perenne</i>          | H | 0 | GCGH | None/Fert  | T1a   | (Gorissen 1996)            |
| <i>Lolium perenne</i>          | H | 0 | GCGH | None       | T2    | (Hall et al. 1998)         |
| <i>Lolium perenne</i>          | H | 0 | GCGH | None/Fert  | T2    | (Hartwig et al. 2002)      |
| <i>Lolium perenne</i>          | H | 0 | FACE | None/Fert  | F1/F4 | (Hebeisen et al. 1997b)    |
| <i>Lolium perenne</i>          | H | 0 | FACE | None/Fert  | F2    | (Hebeisen et al. 1997a)    |
| <i>Lolium perenne</i>          | H | 0 | GCGH | None/Fert  | T1    | (Hodge et al. 1998)        |
| <i>Lolium perenne</i>          | H | 0 | GCGH | None       | T1    | (Laing et al. 2002)        |
| <i>Lolium perenne</i>          | H | 0 | GCGH | None/Fert  | F1    | (Marks & Clay 1990)        |
| <i>Lolium perenne</i>          | H | 0 | GCGH | None       | F3/F3 | (Nijs & Impens 1997)       |
| <i>Lolium perenne</i>          | H | 0 | GCGH | None       | F1    | (Overdieck & Reining 1986) |
| <i>Lolium perenne</i>          | H | 0 | GCGH | None/Fert  | T3    | (Paterson et al. 1999)     |
| <i>Lolium perenne</i>          | H | 0 | GCGH | None       | T1    | (Paterson et al. 1996)     |
| <i>Lolium perenne</i>          | H | 0 | GCGH | None       | F1    | (Ryle et al. 1992b)        |
| <i>Lolium perenne</i>          | H | 0 | GCGH | None       | F1    | (Schenk et al. 1995)       |
| <i>Lolium perenne</i>          | H | 0 | FACE | None       | F1    | (Suter et al. 2002)        |
| <i>Lolium perenne</i>          | H | 0 | GCGH | None/Fert  | F1    | (Suter et al. 2002)        |
| <i>Lolium perenne</i>          | H | 0 | FACE | None       | F4    | (Suter et al. 2001)        |
| <i>Lolium perenne</i>          | H | 0 | GCGH | Fert       | F1    | (Tang et al. 2006)         |
| <i>Lolium temulentum</i>       | H | 0 | GCGH | None/Light | T4    | (Gay & Hauck 1994)         |
| <i>Lolium temulentum</i>       | H | 0 | GCGH | None/Light | F1    | (Lewis et al. 1999)        |
| <i>Lonicera japonica</i>       | W | 0 | GCGH | None       | F2    | (Sasek & Strain 1991)      |

|                                |   |   |      |                          |       |                             |
|--------------------------------|---|---|------|--------------------------|-------|-----------------------------|
| <i>Lonicera sempervirens</i>   | W | 0 | GCGH | None                     | F2    | (Sasek & Strain 1991)       |
| <i>Lotus corniculatus</i>      | H | 1 | GCGH | None/Herbivory           | F1    | (Bazin et al. 2002)         |
| <i>Lotus corniculatus</i>      | H | 1 | GCGH | None/Water               | F2/F4 | (Carter et al. 1997)        |
| <i>Lotus corniculatus</i>      | H | 1 | GCGH | None                     | T1/F4 | (Ferris & Taylor 1993)      |
| <i>Luehea seemannii</i>        | W | 0 | OTC  | None                     | T1    | (Winter & Lovelock 1999)    |
| <i>Lupinus albus</i>           | H | 1 | GCGH | None                     | F1    | (Campbell & Sage 2002)      |
| <i>Lupinus albus</i>           | H | 1 | GCGH | None/Fert                | T1    | (Wasaki et al. 2005)        |
| <i>Lupinus perennis</i>        | H | 1 | FACE | None                     | T1    | (Reich et al. 2001)         |
| <i>Lycopersicon esculentum</i> | H | 0 | GCGH | None                     | T1    | (Bunce 1990)                |
| <i>Lycopersicon esculentum</i> | H | 0 | GCGH | None                     | T1    | (Fierro et al. 1994)        |
| <i>Lycopersicon esculentum</i> | H | 0 | CSTR | None/O <sub>3</sub> /UVB | T3    | (Hao et al. 2000)           |
| <i>Lycopersicon esculentum</i> | H | 0 | GCGH | None/O <sub>3</sub>      | T4    | (Olszyk & Wise 1997)        |
| <i>Lycopersicon esculentum</i> | H | 0 | GCGH | None                     | T3    | (Vanoosten et al. 1995)     |
| <i>Lycopersicon esculentum</i> | H | 0 | GCGH | None/Water               | T1/T2 | (Paez et al. 1984)          |
| <i>Lycopersicon esculentum</i> | H | 0 | GCGH | None                     | F3    | (Schaffer et al. 1997)      |
| <i>Lycopersicon esculentum</i> | H | 0 | GCGH | None                     | T1    | (Stanghellini & Bunce 1993) |
| <i>Lycopersicon esculentum</i> | H | 0 | GCGH | None                     | T1    | (Tognoni et al. 1967)       |
| <i>Lycopersicon esculentum</i> | H | 0 | GCGH | None/Temp                | F1    | (Yelle et al. 1987)         |
| <i>Macadamia integrifolia</i>  | W | 0 | GCGH | None                     | F3    | (Schaffer et al. 1999)      |
| <i>Malus domestica</i>         | W | 0 | GCGH | None                     | T1    | (Chen et al. 2002)          |
| <i>Mangifera indica</i>        | W | 0 | GCGH | None                     | F7    | (Goodfellow et al. 1997)    |
| <i>Mangifera indica</i>        | W | 0 | GCGH | None                     | F3    | (Schaffer et al. 1999)      |
| <i>Manihot esculenta</i>       | H | 0 | OTC  | None                     | F3    | (Fernandez et al. 2002)     |
| <i>Maranthus corymbosa</i>     | W | 0 | Tent | None                     | T4    | (Berryman et al. 1993)      |
| <i>Medicago glomerata</i>      | H | 1 | GCGH | None                     | T2    | (Roumet et al. 2000)        |
| <i>Medicago lupulina</i>       | H | 1 | GCGH | Fert                     | F1    | (Tang et al. 2006)          |
| <i>Medicago minima</i>         | H | 1 | GCGH | None                     | T2    | (Roumet et al. 2000)        |
| <i>Medicago sativa</i>         | H | 1 | GCGH | None                     | T1    | (De Luis et al. 2002)       |
| <i>Medicago sativa</i>         | H | 1 | GCGH | None/Fert                | T1    | (MacDowall 1983)            |
| <i>Medicago sativa</i>         | H | 1 | GCGH | None/Temp                | T1    | (Ziska & Bunce 1994)        |
| <i>Musa sp.</i>                | H | 0 | GCGH | None                     | T5    | (Schaffer et al. 1996)      |
| <i>Musa sp.</i>                | H | 0 | GCGH | None                     | T2    | (Schaffer et al. 1999)      |
| <i>Myriocarpa longpipes</i>    | W | 0 | GCGH | None                     | F1    | (Reekie & Bazzaz 1989)      |

|                             |   |   |      |                     |          |                                |
|-----------------------------|---|---|------|---------------------|----------|--------------------------------|
| <i>Nerium oleander</i>      | W | 0 | GCGH | None                | T5       | (Downton & Grant 1994)         |
| <i>Nicotiana glauca</i>     | H | 0 | GCGH | None/Herbivory      | F1/F3    | (Hughes & Bazzaz 2001)         |
| <i>Nicotiana tabacum</i>    | H | 0 | GCGH | None                | T1       | (Blaschke et al. 2004)         |
| <i>Nicotiana tabacum</i>    | H | 0 | GCGH | None                | F4       | (Masle et al. 1993)            |
| <i>Nicotiana tabacum</i>    | H | 0 | GCGH | None                | F1       | (Matt et al. 2001)             |
| <i>Nicotiana tabacum</i>    | H | 0 | GCGH | None                | F1       | (Schlimme et al. 2002)         |
| <i>Ochroma lagopus</i>      | W | 0 | GCGH | None                | T1       | (Oberbauer et al. 1985)        |
| <i>Oenothera biennis</i>    | H | 0 | GCGH | None/Herbivory      | F1/F3    | (Hughes & Bazzaz 2001)         |
| <i>Opuntia ficus-indica</i> | H | 0 | GCGH | None                | F8       | (Cui & Nobel 1994)             |
| <i>Opuntia ficus-indica</i> | H | 0 | GCGH | None                | T1       | (Nobel & de Cortazar 1991)     |
| <i>Opuntia ficus-indica</i> | H | 0 | GCGH | None                | F5       | (Nobel et al. 1994)            |
| <i>Orontium aquaticum</i>   | H | 0 | GCGH | None                | T2       | (Magonigal & Schlesinger 1997) |
| <i>Orontium aquaticum</i>   | H | 0 | GCGH | None/Flooding       | T1       | (Magonigal et al. 2005)        |
| <i>Oryza sativa</i>         | H | 0 | GCGH | None                | T1       | (Aoki et al. 2003)             |
| <i>Oryza sativa</i>         | H | 0 | GCGH | None                | T3       | (Baker et al. 1994)            |
| <i>Oryza sativa</i>         | H | 0 | GCGH | None                | T1       | (Baker et al. 1990)            |
| <i>Oryza sativa</i>         | H | 0 | GCGH | None                | T2       | (Cheng et al. 2006)            |
| <i>Oryza sativa</i>         | H | 0 | OTC  | None                | F5/F6    | (De Costa et al. 2003)         |
| <i>Oryza sativa</i>         | H | 0 | GCGH | None                | F4       | (Fordham et al. 1997)          |
| <i>Oryza sativa</i>         | H | 0 | FACE | None/Fert           | T1       | (Kim et al. 2001)              |
| <i>Oryza sativa</i>         | H | 0 | TGC  | None                | T1       | (Kim et al. 1996)              |
| <i>Oryza sativa</i>         | H | 0 | OTC  | None/Fert           | F1       | (Li et al. 2004)               |
| <i>Oryza sativa</i>         | H | 0 | OTC  | None                | F1/T1    | (Lin & Wang 1998)              |
| <i>Oryza sativa</i>         | H | 0 | GCGH | None                | T1       | (Makino et al. 1997)           |
| <i>Oryza sativa</i>         | H | 0 | OTC  | None                | T3/F3/F4 | (Moya et al. 1998)             |
| <i>Oryza sativa</i>         | H | 0 | GCGH | None/O <sub>3</sub> | T2       | (Olszyk & Wise 1997)           |
| <i>Oryza sativa</i>         | H | 0 | OTC  | None                | T2       | (Weerakoon et al. 1999)        |
| <i>Oryza sativa</i>         | H | 0 | GCGH | None                | T2/F5    | (Ziska & Teramura 1992b)       |
| <i>Oryza sativa</i>         | H | 0 | OTC  | None                | T1/T2    | (Ziska et al. 1997)            |
| <i>Oryza sativa</i>         | H | 0 | GCGH | None/UVB            | T1       | (Ziska & Teramura 1992a)       |
| <i>Oryzopsis hymenoides</i> | H | 0 | GCGH | None                | T2       | (Smith et al. 1987)            |
| <i>Panicum antidotale</i>   | H | 0 | GCGH | None                | T1       | (Ghannoum et al. 1997)         |
| <i>Panicum antidotale</i>   | H | 0 | GCGH | None/Fert           | T1       | (Ghannoum & Conroy 1998)       |

|                                |   |   |         |                          |    |                                |
|--------------------------------|---|---|---------|--------------------------|----|--------------------------------|
| <i>Panicum coloratum</i>       | H | 0 | GCGH    | None/Fert                | T1 | (Ghannoum & Conroy 1998)       |
| <i>Panicum dichotomoflorum</i> | H | 0 | GCGH    | None                     | T4 | (Thomas et al. 1999)           |
| <i>Panicum dichotomoflorum</i> | H | 0 | GCGH    | None                     | T4 | (Ziska & Bunce 1997a)          |
| <i>Panicum laxum</i>           | H | 0 | GCGH    | None                     | T1 | (Ghannoum et al. 1997)         |
| <i>Panicum laxum</i>           | H | 0 | GCGH    | None/Fert                | T1 | (Ghannoum & Conroy 1998)       |
| <i>Panicum maximum</i>         | H | 0 | GCGH    | None                     | T3 | (Ziska et al. 1999)            |
| <i>Panicum miliaceum</i>       | H | 0 | GCGH    | None                     | T3 | (Ziska et al. 1999)            |
| <i>Panicum virgatum</i>        | H | 0 | GCGH    | None                     | F1 | (LeCain & Morgan 1998)         |
| <i>Pascopyrum smithii</i>      | H | 0 | GCGH    | None                     | T1 | (Hunt et al. 1996)             |
| <i>Pascopyrum smithii</i>      | H | 0 | GCGH    | None                     | F1 | (Read & Morgan 1996)           |
| <i>Paspalum conjugatum</i>     | H | 0 | GCGH    | None                     | T1 | (Ziska et al. 1991)            |
| <i>Pentaclethra macroloba</i>  | W | 0 | GCGH    | None                     | T1 | (Oberbauer et al. 1985)        |
| <i>Persea americana</i>        | W | 0 | GCGH    | None                     | F3 | (Schaffer et al. 1999)         |
| <i>Petalostemum villosum</i>   | H | 1 | FACE    | None                     | T1 | (Reich et al. 2001)            |
| <i>Phalaris aquatica</i>       | H | 0 | Tunnels | None                     | F7 | (Lilley et al. 2001)           |
| <i>Phalaris arundinacea</i>    | H | 0 | GCGH    | None/Fert/Water          | F2 | (Stock & Evans 2006)           |
| <i>Pharus latifolius</i>       | H | 0 | GCGH    | None                     | T1 | (Ziska et al. 1991)            |
| <i>Phaseolus acutifolius</i>   | H | 1 | GCGH    | None                     | T1 | (Salsman et al. 1999)          |
| <i>Phaseolus radiatus</i>      | H | 1 | OTC     | None                     | T1 | (Srivastava et al. 2001)       |
| <i>Phaseolus vulgaris</i>      | H | 1 | OTC     | None/O <sub>3</sub>      | T3 | (Heagle et al. 2002)           |
| <i>Phaseolus vulgaris</i>      | H | 1 | GCGH    | None/Fert                | F5 | (Jifon & Wolfe 2002)           |
| <i>Phaseolus vulgaris</i>      | H | 1 | GCGH    | None/Fert                | F2 | (Radoglou & Jarvis 1992)       |
| <i>Phaseolus vulgaris</i>      | H | 1 | GCGH    | None                     | T1 | (Salsman et al. 1999)          |
| <i>Phaseolus vulgaris</i>      | H | 1 | GCGH    | None                     | T2 | (Tognoni et al. 1967)          |
| <i>Phleum pratense</i>         | H | 0 | GCGH    | None/Fert                | F3 | (Kettunen et al. 2005)         |
| <i>Phleum pratense</i>         | H | 0 | GCGH    | None/Defol/Herbiv/Nemato | T3 | (Wilsey 2001)                  |
| <i>Physalis peruviana</i>      | H | 0 | GCGH    | None/Fert/Water          | F1 | (Stock & Evans 2006)           |
| <i>Phytolacca americana</i>    | H | 0 | GCGH    | None                     | F1 | (He & Bazzaz 2003)             |
| <i>Phytolacca americana</i>    | H | 0 | GCGH    | None                     | F1 | (He et al. 2005)               |
| <i>Picea abies</i>             | W | 0 | GCGH    | None/Fert                | F1 | (Hattenschwiler & Körner 1998) |
| <i>Picea abies</i>             | W | 0 | GCGH    | None                     | T7 | (Lippert et al. 1996)          |
| <i>Picea abies</i>             | W | 0 | GCGH    | None/O <sub>3</sub>      | T2 | (Liu et al. 2004)              |
| <i>Picea abies</i>             | W | 0 | GCGH    | None                     | F1 | (Loewe et al. 2000)            |

|                         |   |   |        |                     |       |                              |
|-------------------------|---|---|--------|---------------------|-------|------------------------------|
| <i>Picea abies</i>      | W | 0 | GCGH   | None                | T2    | (Mortensen 1994a)            |
| <i>Picea abies</i>      | W | 0 | GCGH   | None                | T3    | (Mortensen 1994c)            |
| <i>Picea abies</i>      | W | 0 | OTC    | None                | T2/T3 | (Vanhatalo et al. 2003)      |
| <i>Picea abies</i>      | W | 0 | GCGH   | None                | F2    | (Zebian & Reekie 1998)       |
| <i>Picea glauca</i>     | W | 0 | GCGH   | None/Fert           | T2    | (Brown & Higginbotham 1986)  |
| <i>Picea glauca</i>     | W | 0 | GCGH   | None                | T4    | (Mortensen 1994c)            |
| <i>Picea glauca</i>     | W | 0 | GCGH   | None/UVB            | T3    | (Yakimchuk & Hoddinott 1994) |
| <i>Picea mariana</i>    | W | 0 | GCGH   | None/UVB            | T3    | (Yakimchuk & Hoddinott 1994) |
| <i>Picea rubens</i>     | W | 0 | GCGH   | None                | T3    | (Samuelson & Seiler 1993b)   |
| <i>Picea rubens</i>     | W | 0 | GCGH   | None                | T2    | (Samuelson & Seiler 1993a)   |
| <i>Picea sitchensis</i> | W | 0 | OTC    | None                | F3    | (Centritto et al. 1999)      |
| <i>Picea sitchensis</i> | W | 0 | GCGH   | None                | T4    | (Mortensen 1994c)            |
| <i>Picea sitchensis</i> | W | 0 | OTC    | None/Fert           | F8    | (Murray et al. 2000)         |
| <i>Picea sitchensis</i> | W | 0 | OTC    | None                | F2    | (Murray et al. 1996)         |
| <i>Pinus banksiana</i>  | W | 0 | GCGH   | None/Fert           | F5    | (Cantin et al. 1996)         |
| <i>Pinus banksiana</i>  | W | 0 | GCGH   | None/UVB            | F1    | (Stewart & Hoddinott 1993)   |
| <i>Pinus banksiana</i>  | W | 0 | GCGH   | None/UVB            | T3    | (Yakimchuk & Hoddinott 1994) |
| <i>Pinus contorta</i>   | W | 0 | GCGH   | None                | T4    | (Mortensen 1994c)            |
| <i>Pinus densiflora</i> | W | 0 | GCGH   | None                | F1    | (Choi et al. 2005)           |
| <i>Pinus echinata</i>   | W | 0 | GCGH   | None                | T1    | (Norby et al. 1987)          |
| <i>Pinus echinata</i>   | W | 0 | GCGH   | None                | T1    | (O'Neill et al. 1987b)       |
| <i>Pinus halepensis</i> | W | 0 | GCGH   | None/O <sub>3</sub> | T2    | (Kytoviita et al. 1999)      |
| <i>Pinus halepensis</i> | W | 0 | GCGH   | None                | T1    | (Kytoviita et al. 2001)      |
| <i>Pinus jeffreyi</i>   | W | 0 | GCGH   | None                | F3    | (Verburg et al. 2004)        |
| <i>Pinus mugo</i>       | W | 0 | GCGH   | None                | T4    | (Mortensen 1994c)            |
| <i>Pinus nigra</i>      | W | 0 | GCGH   | None                | T3    | (Kaushal et al. 1989)        |
| <i>Pinus palustris</i>  | W | 0 | OTC    | None/Fert           | T1    | (Entry et al. 1998)          |
| <i>Pinus palustris</i>  | W | 0 | OTC    | None/Fert           | F1    | (Prior et al. 1997)          |
| <i>Pinus palustris</i>  | W | 0 | OTC    | None/Water          | T1    | (Runion et al. 1999)         |
| <i>Pinus pinaster</i>   | W | 0 | Tunnel | None/Water          | T1    | (Guehl et al. 1994)          |
| <i>Pinus ponderosa</i>  | W | 0 | GCGH   | None                | T1    | (BassiriRad et al. 1996a)    |
| <i>Pinus ponderosa</i>  | W | 0 | GCGH   | None                | F1    | (BassiriRad et al. 1997a)    |
| <i>Pinus ponderosa</i>  | W | 0 | GCGH   | None                | T3    | (Callaway et al. 1994)       |

|                         |   |   |      |                            |          |                              |
|-------------------------|---|---|------|----------------------------|----------|------------------------------|
| <i>Pinus ponderosa</i>  | W | 0 | GCGH | None/Fert                  | F1       | (Griffin et al. 1995)        |
| <i>Pinus ponderosa</i>  | W | 0 | GCGH | None/Fert                  | T1       | (Griffin et al. 1997)        |
| <i>Pinus ponderosa</i>  | W | 0 | GCGH | None                       | F1       | (Maherali & DeLucia 2000)    |
| <i>Pinus ponderosa</i>  | W | 0 | OTC  | None/Fert                  | T1       | (Walker et al. 1997)         |
| <i>Pinus ponderosa</i>  | W | 0 | OTC  | None/Fert                  | T1       | (Walker et al. 1998)         |
| <i>Pinus radiata</i>    | W | 0 | GCGH | None/Water                 | F1/T1/T4 | (Conroy & Barlow 1986)       |
| <i>Pinus radiata</i>    | W | 0 | GCGH | None                       | T1/T3    | (Conroy et al. 1990)         |
| <i>Pinus silvestris</i> | W | 0 | GCGH | None                       | F1       | (Ineichen et al. 1995)       |
| <i>Pinus strobus</i>    | W | 0 | GCGH | None                       | F1       | (Bauer & Berntson 2001)      |
| <i>Pinus strobus</i>    | W | 0 | GCGH | None                       | F1       | (Bauer & Berntson 2001)      |
| <i>Pinus strobus</i>    | W | 0 | GCGH | None                       | F1/T1    | (Bazzaz et al. 1990)         |
| <i>Pinus strobus</i>    | W | 0 | GCGH | None                       | T1       | (Godbold et al. 1997)        |
| <i>Pinus sylvestris</i> | W | 0 | OTC  | None/O <sub>3</sub> /Water | F2       | (Broadmeadow & Jackson 2000) |
| <i>Pinus sylvestris</i> | W | 0 | GCGH | None                       | F2       | (Fransson et al. 2005)       |
| <i>Pinus sylvestris</i> | W | 0 | GCGH | None                       | T1       | (Gorissen & Kuyper 2000)     |
| <i>Pinus sylvestris</i> | W | 0 | OTC  | None                       | F1       | (Jach et al. 2000)           |
| <i>Pinus sylvestris</i> | W | 0 | GCGH | None                       | T1       | (Markkola et al. 1996)       |
| <i>Pinus sylvestris</i> | W | 0 | GCGH | None                       | T5       | (Mortensen 1994c)            |
| <i>Pinus sylvestris</i> | W | 0 | GCGH | None                       | F1       | (Rouhier & Read 1998a)       |
| <i>Pinus sylvestris</i> | W | 0 | OTC  | None                       | T4       | (Temperton et al. 2003b)     |
| <i>Pinus sylvestris</i> | W | 0 | OTC  | None                       | T4       | (Vanhatalo et al. 2003)      |
| <i>Pinus taeda</i>      | W | 0 | GCGH | None                       | T1       | (BassiriRad et al. 1996a)    |
| <i>Pinus taeda</i>      | W | 0 | GCGH | None                       | F1       | (BassiriRad et al. 1997a)    |
| <i>Pinus taeda</i>      | W | 0 | GCGH | None/Fert                  | F1       | (Griffin et al. 1995)        |
| <i>Pinus taeda</i>      | W | 0 | GCGH | None/Fert                  | T1       | (Griffin et al. 1997)        |
| <i>Pinus taeda</i>      | W | 0 | GCGH | None                       | T2       | (Hussain et al. 2001)        |
| <i>Pinus taeda</i>      | W | 0 | GCGH | None/Fert                  | F1/F1    | (Larigauderie et al. 1994)   |
| <i>Pinus taeda</i>      | W | 0 | GCGH | None                       | T1       | (Lewis & Strain 1996)        |
| <i>Pinus taeda</i>      | W | 0 | GCGH | None                       | T1       | (Lewis et al. 1994)          |
| <i>Pinus taeda</i>      | W | 0 | GCGH | None                       | T1       | (Sionit et al. 1985)         |
| <i>Pinus taeda</i>      | W | 0 | GCGH | None                       | F1/T1    | (Sullivan & Teramure 1994)   |
| <i>Pinus taeda</i>      | W | 0 | OTC  | None                       | T1       | (Tissue et al. 1996)         |
| <i>Pinus taeda</i>      | W | 0 | GCGH | None                       | T1       | (Tolley & Strain 1984a)      |

|                                |   |   |           |                          |       |                            |
|--------------------------------|---|---|-----------|--------------------------|-------|----------------------------|
| <i>Pinus taeda</i>             | W | 0 | GCGH      | None                     | T2/T3 | (Tolley & Strain 1984b)    |
| <i>Pinus taeda</i>             | W | 0 | GCGH      | None                     | F2    | (Tschaplinski et al. 1993) |
| <i>Pinus taeda</i>             | W | 0 | GCGH      | None                     | F1    | (Will & Teskey 1997)       |
| <i>Piper auritum</i>           | W | 0 | GCGH      | None                     | F1    | (Reekie & Bazzaz 1989)     |
| <i>Pisum sativum</i>           | H | 1 | GCGH      | None                     | T1    | (Cabrerizo et al. 2001)    |
| <i>Pisum sativum</i>           | H | 1 | GCGH      | None/Fert                | F1    | (Gavito et al. 2000)       |
| <i>Pisum sativum</i>           | H | 1 | GCGH      | None                     | F1    | (Gavito et al. 2003)       |
| <i>Pisum sativum</i>           | H | 1 | GCGH      | None                     | F4    | (Gavito et al. 2002)       |
| <i>Pisum sativum</i>           | H | 1 | GCGH      | None                     | T2    | (Musgrave et al. 1986)     |
| <i>Pisum sativum</i>           | H | 1 | GCGH      | None                     | T1    | (Paez et al. 1983)         |
| <i>Plantago lanceolata</i>     | H | 0 | GCGH      | None/Herbivory           | T1    | (Fajer et al. 1991)        |
| <i>Plantago lanceolata</i>     | H | 0 | GCGH      | None/Fert                | F1    | (Rouhier & Read 1998b)     |
| <i>Plantago major</i>          | H | 0 | GCGH      | None                     | T4    | (Thomas et al. 1999)       |
| <i>Plantago media</i>          | H | 0 | GCGH      | None                     | T1/F4 | (Ferris & Taylor 1993)     |
| <i>Plantago virginica</i>      | H | 0 | GCGH      | Fert                     | F1    | (Tang et al. 2006)         |
| <i>Platanus occidentalis</i>   | W | 0 | OTC       | None/Water               | F1    | (Tschaplinski et al. 1995) |
| <i>Pleuraphis rigida</i>       | H | 0 | GCGH      | None                     | T2    | (Yoder et al. 2000)        |
| <i>Pleuraphis rigida</i>       | H | 0 | GCGH      | None                     | T2    | (Yoder et al. 2000)        |
| <i>Poa alpina</i>              | H | 0 | OTC       | None                     | F1    | (Baxter et al. 1994)       |
| <i>Poa alpina</i>              | H | 0 | GCGH      | None/Fert                | T1    | (Baxter et al. 1997)       |
| <i>Poa annua</i>               | H | 0 | GCGH      | None/Fert                | F1/F3 | (Hunt et al. 1995)         |
| <i>Poa annua</i>               | H | 0 | Solardome | None/Temp                | F1    | (Stirling et al. 1998)     |
| <i>Poa annua</i>               | H | 0 | GCGH      | Fert                     | F1    | (Tang et al. 2006)         |
| <i>Poa pratensis</i>           | H | 0 | GCGH      | None/Fert                | F1    | (Goverde et al. 2002)      |
| <i>Poa pratensis</i>           | H | 0 | FACE      | None                     | T1    | (Reich et al. 2001)        |
| <i>Poa pratensis</i>           | H | 0 | GCGH      | None/Defol/Herbiv/Nemato | T3    | (Wilsey 2001)              |
| <i>Polygonum hydropiper</i>    | H | 0 | GCGH      | None                     | T2    | (Farnsworth & Bazzaz 1995) |
| <i>Polygonum lapathifolium</i> | H | 0 | GCGH      | None                     | T2    | (Farnsworth & Bazzaz 1995) |
| <i>Polygonum pensylvanicum</i> | H | 0 | GCGH      | None                     | F1    | (Bernacchi et al. 2000)    |
| <i>Polygonum pensylvanicum</i> | H | 0 | GCGH      | None/SO <sub>2</sub>     | F1/T1 | (Carlson & Bazzaz 1982)    |
| <i>Polygonum persicaria</i>    | H | 0 | GCGH      | None                     | T2    | (Farnsworth & Bazzaz 1995) |
| <i>Populus euramericana</i>    | W | 0 | GCGH      | None                     | T2    | (Bosac et al. 1995)        |
| <i>Populus alba</i>            | W | 0 | FACE      | None                     | T2    | (Calfapietra et al. 2003)  |

|                                         |   |   |         |                          |       |                                |
|-----------------------------------------|---|---|---------|--------------------------|-------|--------------------------------|
| <i>Populus deltoides</i>                | W | 0 | GCGH    | None                     | T1    | (Wait et al. 1999)             |
| <i>Populus deltoides x P. nigra</i>     | W | 0 | OTC     | None/O <sub>3</sub>      | F2    | (Dickson et al. 1998)          |
| <i>Populus grandidentata</i>            | W | 0 | OTC     | None                     | T1    | (Zak et al. 1993)              |
| <i>Populus nigra</i>                    | W | 0 | FACE    | None                     | T2    | (Calfapietra et al. 2003)      |
| <i>Populus nigra x P. maximowiczii</i>  | W | 0 | OTC     | None/O <sub>3</sub>      | F2    | (Dickson et al. 1998)          |
| <i>Populus tremuloides</i>              | W | 0 | FACE    | None                     | F1    | (King et al. 2005)             |
| <i>Populus tremula x P. alba</i>        | W | 0 | GCGH    | None/Fert                | F2    | (Kruse et al. 2003)            |
| <i>Populus tremula x P. tremuloides</i> | W | 0 | GCGH    | None                     | F1    | (Loewe et al. 2000)            |
| <i>Populus tremuloides</i>              | W | 0 | GCGH    | None/Fert                | T3    | (Brown & Higginbotham 1986)    |
| <i>Populus tremuloides</i>              | W | 0 | GCGH    | None/Fert/O <sub>3</sub> | F3/T2 | (Volin & Reich 1996)           |
| <i>Populus tremuloides</i>              | W | 0 | OTC     | None/Fert                | T5    | (Wang & Curtis 2001)           |
| <i>Populus tremuloides</i>              | W | 0 | OTC     | None/Fert                | T1    | (Zak et al. 2000)              |
| <i>Populus trichocarpa</i>              | W | 0 | CTC     | None/Fert                | T3    | (Sigurdsson et al. 2001)       |
| <i>Populus x euramericana</i>           | W | 0 | FACE    | None                     | T2    | (Calfapietra et al. 2003)      |
| <i>Populus x euramericana</i>           | W | 0 | OTC     | None/Fert                | T1    | (Pregitzer et al. 1995)        |
| <i>Prosopis flexuosa</i>                | W | 1 | GCGH    | None/Fert                | F1    | (Causin et al. 2004)           |
| <i>Prosopis glandulosa</i>              | W | 1 | GCGH    | None                     | F1    | (BassiriRad et al. 1997b)      |
| <i>Prosopis glandulosa</i>              | W | 1 | GCGH    | None/Fert                | F1    | (Causin et al. 2004)           |
| <i>Prosopis glandulosa</i>              | W | 1 | GCGH    | None                     | T3    | (Derner et al. 2005)           |
| <i>Prosopis glandulosa</i>              | W | 1 | GCGH    | None                     | F3    | (Polley et al. 1996)           |
| <i>Prosopis glandulosa</i>              | W | 1 | GCGH    | None                     | T1/T3 | (Polley et al. 1999b)          |
| <i>Prunella vulgaris</i>                | H | 0 | GCGH    | None                     | T1    | (Sanders et al. 1998)          |
| <i>Prunus avium</i>                     | W | 0 | BALLOON | None                     | T3    | (Druta 2001)                   |
| <i>Prunus avium</i>                     | W | 0 | GCGH    | None/Fert                | T2    | (Wilkins et al. 1994)          |
| <i>Prunus avium x pseudocerasus</i>     | W | 0 | GCGH    | None                     | T4    | (Atkinson et al. 1997)         |
| <i>Prunus laurocerasus</i>              | W | 0 | OTC     | None                     | F3    | (Hattenschwiler & Körner 2003) |
| <i>Prunus persica</i>                   | W | 0 | OTC     | None/Water               | F3    | (Centritto et al. 2002)        |
| <i>Prunus serotina</i>                  | W | 0 | GCGH    | None                     | F1/T1 | (Bazzaz et al. 1990)           |
| <i>Prunus serotina</i>                  | W | 0 | GCGH    | None                     | T4    | (Loats & Rebbeck 1999)         |
| <i>Pseudobombax septenatum</i>          | W | 0 | OTC     | None                     | T1    | (Winter & Lovelock 1999)       |
| <i>Pseudotsuga menziesii</i>            | W | 0 | GCGH    | None                     | T1    | (Gorissen 1996)                |
| <i>Pseudotsuga menziesii</i>            | W | 0 | GCGH    | None                     | T4    | (Mortensen 1994c)              |
| <i>Pseudotsuga menziesii</i>            | W | 0 | OTC     | None                     | F1    | (Olszyk et al. 2003)           |

|                              |   |   |        |                            |      |                                |
|------------------------------|---|---|--------|----------------------------|------|--------------------------------|
| <i>Pseudotsuga menziesii</i> | W | 0 | OTC    | None                       | F3   | (Tingey et al. 2003)           |
| <i>Psychotria limonensis</i> | W | 0 | GCGH   | None                       | T1   | (Ziska et al. 1991)            |
| <i>Puccinellia maritima</i>  | H | 0 | GCGH   | None/Salt                  | T3   | (Lenssen et al. 1995)          |
| <i>Pueraria lobata</i>       | W | 1 | GCGH   | None                       | T6   | (Sasek & Strain 1988)          |
| <i>Pueraria lobata</i>       | W | 1 | GCGH   | None                       | F4   | (Sasek & Strain 1990)          |
| <i>Quercus alba</i>          | W | 0 | GCGH   | None                       | F1   | (Norby et al. 1986)            |
| <i>Quercus alba</i>          | W | 0 | OTC    | None                       | T1   | (Norby et al. 1995)            |
| <i>Quercus alba</i>          | W | 0 | GCGH   | None/Fert                  | T2   | (Norby & O'Neil 1989)          |
| <i>Quercus alba</i>          | W | 0 | GCGH   | None                       | T2   | (O'Neill et al. 1987b)         |
| <i>Quercus cerrioides</i>    | W | 0 | GCGH   | None                       | F2   | (Cortes et al. 2004)           |
| <i>Quercus ilex</i>          | W | 0 | GCGH   | None                       | F5   | (Aranda et al. 2006)           |
| <i>Quercus ilex</i>          | W | 0 | GCGH   | None                       | F2   | (Cortes et al. 2004)           |
| <i>Quercus petraea</i>       | W | 0 | OTC    | None/O <sub>3</sub> /Water | F2   | (Broadmeadow & Jackson 2000)   |
| <i>Quercus petraea</i>       | W | 0 | Tunnel | None/Water                 | T1   | (Guehl et al. 1994)            |
| <i>Quercus robur</i>         | W | 0 | OTC    | None/O <sub>3</sub> /Water | F3   | (Broadmeadow et al. 1999)      |
| <i>Quercus robur</i>         | W | 0 | GCGH   | None                       | Text | (George et al. 1996)           |
| <i>Quercus robur</i>         | W | 0 | GCGH   | None/Fert                  | F1   | (Maillard et al. 2001)         |
| <i>Quercus robur</i>         | W | 0 | Tunnel | None/Water                 | T2   | (Picon et al. 1997)            |
| <i>Quercus robur</i>         | W | 0 | Tunnel | None/Water                 | F5   | (Picon et al. 1996)            |
| <i>Quercus robur</i>         | W | 0 | GCGH   | None                       | T2   | (Seegmuller & Rennenberg 1994) |
| <i>Quercus robur</i>         | W | 0 | GCGH   | None                       | T1   | (Vivin et al. 1996b)           |
| <i>Quercus robur</i>         | W | 0 | Tunnel | None/Water                 | T2   | (Vivin & Guehl 1997)           |
| <i>Quercus robur</i>         | W | 0 | Tunnel | None                       | T1   | (Vivin et al. 1995)            |
| <i>Quercus rubra</i>         | W | 0 | GCGH   | None                       | T3   | (Anderson & Tomlinson 1998)    |
| <i>Quercus rubra</i>         | W | 0 | GCGH   | None/Light                 | T1   | (Cavender-Bares et al. 2000)   |
| <i>Quercus rubra</i>         | W | 0 | GCGH   | None                       | T2   | (Miao 1995)                    |
| <i>Quercus rubra</i>         | W | 0 | Tunnel | None/Water                 | T2   | (Vivin et al. 1996a)           |
| <i>Quercus suber</i>         | W | 0 | GCGH   | None                       | F2   | (Damesin et al. 1996)          |
| <i>Quercus suber</i>         | W | 0 | GCGH   | None/Fert                  | T1   | (Maroco et al. 2002)           |
| <i>Quercus suber</i>         | W | 0 | GCGH   | None/Light/Water           | F2   | (Pardos et al. 2006)           |
| <i>Quercus virginiana</i>    | W | 0 | OTC    | None/Fert                  | T1   | (Tognetti & Johnson 1999)      |
| <i>Raphanus hybrid</i>       | H | 0 | GCGH   | None                       | F1   | (Chu & Coleman 1992)           |
| <i>Raphanus raphanistrum</i> | H | 0 | GCGH   | None/Fert                  | F2   | (Jablonski 1997)               |

|                                |   |   |           |                      |       |                             |
|--------------------------------|---|---|-----------|----------------------|-------|-----------------------------|
| <i>Raphanus sativus</i>        | H | 0 | GCGH      | None/Fert            | F2    | (Jablonski 1997)            |
| <i>Raphanus sativus</i>        | H | 0 | GCGH      | None                 | F2    | (Overdieck et al. 1988)     |
| <i>Raphanus sativus</i>        | H | 0 | GCGH      | None                 | F2    | (Sionit et al. 1982)        |
| <i>Raphanus sativus</i>        | H | 0 | GCGH      | None                 | F1    | (Usuda & Shimogawara 1998)  |
| <i>Ricinus communis</i>        | H | 0 | GCGH      | None                 | T2    | (Arnone & Körner 1993)      |
| <i>Robinia pseudoacacia</i>    | W | 1 | GCGH      | None                 | T1    | (Norby 1987)                |
| <i>Robinia pseudoacacia</i>    | W | 1 | GCGH      | None/Fert            | T1    | (Olesniewicz & Thomas 1999) |
| <i>Robinia pseudoacacia</i>    | W | 1 | GCGH      | None/Fert/Temp       | F2    | (Uselman et al. 2000)       |
| <i>Rottboellia exaltata</i>    | H | 0 | GCGH      | None                 | T1/T3 | (Patterson & Flint 1980)    |
| <i>Rumex crispus</i>           | H | 0 | GCGH      | None                 | T4    | (Thomas et al. 1999)        |
| <i>Rumex obtusifolius</i>      | H | 0 | Solardome | None/Herbivory       | F6    | (Pearson & Brooks 1996)     |
| <i>Rumex obtusifolius</i>      | H | 0 | Solardome | None                 | F7    | (Pearson & Brooks 1995)     |
| <i>Saccharum officinarum</i>   | H | 0 | GCGH      | None                 | T4    | (Ziska & Bunce 1997a)       |
| <i>Sanguisorba minor</i>       | H | 0 | GCGH      | None                 | T1/F4 | (Ferris & Taylor 1993)      |
| <i>Sanguisorba minor</i>       | H | 0 | GCGH      | None                 | T2    | (Ferris & Taylor 1995)      |
| <i>Sanguisorba minor</i>       | H | 0 | GCGH      | None                 | T1    | (Wieneke et al. 2004)       |
| <i>Schizachyrium scoparium</i> | H | 0 | GCGH      | None                 | F1    | (LeCain & Morgan 1998)      |
| <i>Schizachyrium scoparium</i> | H | 0 | FACE      | None                 | T1    | (Reich et al. 2001)         |
| <i>Scirpus olneyi</i>          | H | 0 | OTC       | None                 | F1    | (Dakora & Drake 2000)       |
| <i>Senecio vulgaris</i>        | H | 0 | Solardome | None                 | F1    | (Stirling et al. 1998)      |
| <i>Senna multijuga</i>         | W | 0 | GCGH      | None                 | F1    | (Reekie & Bazzaz 1989)      |
| <i>Setaria faberi</i>          | H | 0 | GCGH      | None                 | F1/T1 | (Carlson & Bazzaz 1982)     |
| <i>Setaria faberi</i>          | H | 0 | GCGH      | None                 | T4    | (Ziska & Bunce 1997a)       |
| <i>Setaria glauca</i>          | H | 0 | GCGH      | Fert                 | F1    | (Tang et al. 2006)          |
| <i>Setaria lutescens</i>       | H | 0 | GCGH      | None/SO <sub>2</sub> | F1/T1 | (Carlson & Bazzaz 1982)     |
| <i>Setaria viridis</i>         | H | 0 | GCGH      | None                 | T4    | (Ziska & Bunce 1997a)       |
| <i>Silene latifolia</i>        | H | 0 | GCGH      | None                 | T2    | (Wang & Griffin 2003)       |
| <i>Sinapis alba</i>            | H | 0 | GCGH      | None/Water           | T1    | (Retuerto & Woodward 1993)  |
| <i>Solanum dulcamara</i>       | H | 0 | GCGH      | None/Infestation     | F2    | (Flynn et al. 2006)         |
| <i>Solanum dulcamara</i>       | H | 0 | GCGH      | None/Herbivory       | F1/F3 | (Hughes & Bazzaz 2001)      |
| <i>Solanum muricatum</i>       | H | 0 | GCGH      | None/Salt            | T4    | (Chen et al. 1999)          |
| <i>Solanum tuberosum</i>       | H | 0 | GCGH      | None/Temp            | T1/T4 | (Cao et al. 1994)           |
| <i>Solanum tuberosum</i>       | H | 0 | GCGH      | None                 | F2    | (Chen & Setter 2003)        |

|                                 |   |   |      |                     |       |                            |
|---------------------------------|---|---|------|---------------------|-------|----------------------------|
| <i>Solanum tuberosum</i>        | H | 0 | OTC  | None/O <sub>3</sub> | T3    | (Craigon et al. 2002)      |
| <i>Solanum tuberosum</i>        | H | 0 | OTC  | None/O <sub>3</sub> | T1    | (Donnelly et al. 2001)     |
| <i>Solanum tuberosum</i>        | H | 0 | OTC  | None/O <sub>3</sub> | T2    | (Fangmeier et al. 2002)    |
| <i>Solanum tuberosum</i>        | H | 0 | OTC  | None/O <sub>3</sub> | T3    | (Heagle et al. 2003)       |
| <i>Solanum tuberosum</i>        | H | 0 | OTC  | None/O <sub>3</sub> | T5    | (Lawson et al. 2001)       |
| <i>Solanum tuberosum</i>        | H | 0 | OTC  | None                | T1    | (Schapendonk et al. 2000)  |
| <i>Solanum tuberosum</i>        | H | 0 | GCGH | None                | T3    | (Wheeler et al. 1991)      |
| <i>Solidago rigida</i>          | H | 0 | FACE | None                | T1    | (Reich et al. 2001)        |
| <i>Sonchus arvensis</i>         | H | 0 | GCGH | None                | T3    | (Ziska 2003)               |
| <i>Sorghastrum nutans</i>       | H | 0 | GCGH | None                | F1    | (LeCain & Morgan 1998)     |
| <i>Sorghastrum nutans</i>       | H | 0 | FACE | None                | T1    | (Reich et al. 2001)        |
| <i>Sorghum bicolor</i>          | H | 0 | OTC  | None                | T1    | (Amthor et al. 1994)       |
| <i>Sorghum bicolor</i>          | H | 0 | GCGH | None                | T3    | (Chaudhuri et al. 1986)    |
| <i>Sorghum bicolor</i>          | H | 0 | GCGH | None/Root herbivory | T1    | (Watling & Press 1997)     |
| <i>Sorghum bicolor</i>          | H | 0 | GCGH | None                | T1    | (Ziska & Bunce 1999)       |
| <i>Sorghum bicolor</i>          | H | 0 | GCGH | None                | T4    | (Ziska & Bunce 1997a)      |
| <i>Sorghum halepense</i>        | H | 0 | GCGH | None                | F1    | (Carter & Peterson 1983)   |
| <i>Sorghum halepense</i>        | H | 0 | GCGH | None                | F1/F4 | (Tremmel & Patterson 1993) |
| <i>Sorghum halepense</i>        | H | 0 | GCGH | None                | T4    | (Ziska & Bunce 1997a)      |
| <i>Spartina anglica</i>         | H | 0 | GCGH | None                | T5    | (Lenssen et al. 1993)      |
| <i>Spartina patens</i>          | H | 0 | OTC  | None                | F1    | (Dakora & Drake 2000)      |
| <i>Sporobolus kentrophyllus</i> | H | 0 | GCGH | None                | F1    | (Wilsey et al. 1994)       |
| <i>Stellaria holostea</i>       | H | 0 | GCGH | None                | F1    | (Reining 1995)             |
| <i>Stipa occidentalis</i>       | H | 0 | GCGH | None/Fert           | F1    | (Wilsey 1996)              |
| <i>Stipa thurberiana</i>        | H | 0 | GCGH | None                | F2    | (Lucash et al. 2005)       |
| <i>Tabebuia rosea</i>           | W | 0 | GCGH | None                | T1    | (Ziska et al. 1991)        |
| <i>Taraxacum officinale</i>     | H | 0 | GCGH | None                | T4    | (Thomas et al. 1999)       |
| <i>Taxodium distichum</i>       | W | 0 | GCGH | None/Flooding       | T1    | (Megonigal et al. 2005)    |
| <i>Taxodium distichum</i>       | W | 0 | GCGH | None                | F2    | (Vann & Megonigal 2002)    |
| <i>Tetragastris panamensis</i>  | W | 0 | OTC  | None                | T1    | (Winter & Lovelock 1999)   |
| <i>Themeda triandra</i>         | H | 0 | GCGH | None/UVB            | F5    | (Wand et al. 1996)         |
| <i>Trichospermum mexicanum</i>  | W | 0 | GCGH | None                | F1    | (Reekie & Bazzaz 1989)     |
| <i>Tridens flavus</i>           | H | 0 | GCGH | None/Fert           | F3    | (Marks & Clay 1990)        |

|                               |   |   |           |                     |       |                         |
|-------------------------------|---|---|-----------|---------------------|-------|-------------------------|
| <i>Trifolium repens</i>       | H | 1 | GCGH      | None                | T1    | (Almeida et al. 1999)   |
| <i>Trifolium repens</i>       | H | 1 | GCGH      | None                | T1    | (Dale & Press 1998)     |
| <i>Trifolium repens</i>       | H | 1 | GCGH      | None                | T2    | (Deckmyn et al. 2001)   |
| <i>Trifolium repens</i>       | H | 1 | GCGH      | None                | T1    | (Gunn et al. 1999)      |
| <i>Trifolium repens</i>       | H | 1 | OTC       | None/O <sub>3</sub> | T4    | (Heagle et al. 1993)    |
| <i>Trifolium repens</i>       | H | 1 | FACE      | None/Fert           | F1/F4 | (Hebeisen et al. 1997b) |
| <i>Trifolium repens</i>       | H | 1 | FACE      | None/Fert           | F2    | (Hebeisen et al. 1997a) |
| <i>Trifolium repens</i>       | H | 1 | GCGH      | None                | F1    | (Jongen et al. 1996)    |
| <i>Trifolium repens</i>       | H | 1 | GCGH      | None                | T1    | (Laing et al. 2002)     |
| <i>Trifolium repens</i>       | H | 1 | GCGH      | None                | F2    | (Ryle et al. 1992a)     |
| <i>Trifolium repens</i>       | H | 1 | GCGH      | None                | F3    | (Schenk et al. 1995)    |
| <i>Trifolium subterraneum</i> | H | 1 | Tunnels   | None                | F7    | (Lilley et al. 2001)    |
| <i>Triticum aestivum</i>      | H | 0 | OTC       | None                | T1/T3 | (Kendall et al. 1985)   |
| <i>Triticum aestivum</i>      | H | 0 | OTC       | None                | T1    | (Ronn et al. 2003)      |
| <i>Triticum aestivum</i>      | H | 0 | GCGH      | None                | T2    | (Andre et al. 1989)     |
| <i>Triticum aestivum</i>      | H | 0 | GCGH      | None/O <sub>3</sub> | F3    | (Barnes et al. 1995)    |
| <i>Triticum aestivum</i>      | H | 0 | GCGH      | None                | F3    | (Bencze et al. 2000)    |
| <i>Triticum aestivum</i>      | H | 0 | GCGH      | None/Fert           | T1    | (Billes et al. 1993)    |
| <i>Triticum aestivum</i>      | H | 0 | GCGH      | None                | F2    | (Bloom et al. 2002)     |
| <i>Triticum aestivum</i>      | H | 0 | Rhizotron | None/Water          | F3/F4 | (Chaudhuri et al. 1990) |
| <i>Triticum aestivum</i>      | H | 0 | GCGH      | None                | F3    | (Christ & Körner 1995)  |
| <i>Triticum aestivum</i>      | H | 0 | GCGH      | None                | T1    | (Ducloux et al. 1987)   |
| <i>Triticum aestivum</i>      | H | 0 | GCGH      | None                | T1    | (Derner et al. 2004)    |
| <i>Triticum aestivum</i>      | H | 0 | OTC       | None                | T3    | (Dijkstra et al. 1999)  |
| <i>Triticum aestivum</i>      | H | 0 | OTC       | None                | T4    | (Fangmeier et al. 1996) |
| <i>Triticum aestivum</i>      | H | 0 | GCGH      | None                | F1    | (Gifford 1979)          |
| <i>Triticum aestivum</i>      | H | 0 | GCGH      | None                | T1    | (Gorissen 1996)         |
| <i>Triticum aestivum</i>      | H | 0 | OTC       | None/O <sub>3</sub> | T3/T4 | (Heagle et al. 2000)    |
| <i>Triticum aestivum</i>      | H | 0 | GCGH      | None                | T1    | (Hocking & Meyer 1991)  |
| <i>Triticum aestivum</i>      | H | 0 | OTC       | None                | T2    | (Hudak et al. 1999)     |
| <i>Triticum aestivum</i>      | H | 0 | GCGH      | None/Water          | T2    | (Kang et al. 2002)      |
| <i>Triticum aestivum</i>      | H | 0 | FACE      | None                | F6    | (Kimball et al. 1995)   |
| <i>Triticum aestivum</i>      | H | 0 | GCGH      | None/Fert           | T2    | (Li et al. 2003)        |

|                             |   |   |      |                     |         |                             |
|-----------------------------|---|---|------|---------------------|---------|-----------------------------|
| <i>Triticum aestivum</i>    | H | 0 | GCGH | None                | F1      | (Masle et al. 1990)         |
| <i>Triticum aestivum</i>    | H | 0 | GCGH | None                | F1      | (McKee & Woodward 1994)     |
| <i>Triticum aestivum</i>    | H | 0 | GCGH | None/O <sub>3</sub> | F1      | (McKee et al. 1997)         |
| <i>Triticum aestivum</i>    | H | 0 | GCGH | None                | F4      | (McMaster et al. 1999)      |
| <i>Triticum aestivum</i>    | H | 0 | GCGH | None/Fert           | F1/T1   | (Mitchell et al. 1993)      |
| <i>Triticum aestivum</i>    | H | 0 | GCGH | None/O <sub>3</sub> | T3      | (Mortensen 1990)            |
| <i>Triticum aestivum</i>    | H | 0 | GCGH | None                | F2      | (Musgrave & Strain 1988)    |
| <i>Triticum aestivum</i>    | H | 0 | GCGH | None/Salt           | F1      | (Nicolas et al. 1993)       |
| <i>Triticum aestivum</i>    | H | 0 | OTC  | None/Fert           | T1      | (Pal et al. 2005)           |
| <i>Triticum aestivum</i>    | H | 0 | GCGH | None                | T1      | (Paterson et al. 1996)      |
| <i>Triticum aestivum</i>    | H | 0 | OTC  | None                | T2      | (Saebo & Mortensen 1996)    |
| <i>Triticum aestivum</i>    | H | 0 | GCGH | None                | F4      | (Santrucek et al. 1994)     |
| <i>Triticum aestivum</i>    | H | 0 | GCGH | None                | T1      | (Sionit et al. 1980)        |
| <i>Triticum aestivum</i>    | H | 0 | GCGH | None/Fert           | T1      | (Sionit et al. 1981a)       |
| <i>Triticum aestivum</i>    | H | 0 | GCGH | None/Water          | T1      | (Sionit et al. 1981b)       |
| <i>Triticum aestivum</i>    | H | 0 | GCGH | None/Fert           | F3      | (Smart et al. 1998)         |
| <i>Triticum aestivum</i>    | H | 0 | GCGH | None/Water          | T1      | (Van Vuuren et al. 1997)    |
| <i>Triticum aestivum</i>    | H | 0 | FACE | None/Water          | F13     | (Wall et al. 2006)          |
| <i>Triticum aestivum</i>    | H | 0 | GCGH | None/Fert           | F1/F2   | (Wolf 1996b)                |
| <i>Triticum aestivum</i>    | H | 0 | GCGH | None/Fert           | F2/F4   | (Wong & Osmond 1991)        |
| <i>Triticum durum</i>       | H | 0 | GCGH | None/Salt           | F1      | (Nicolas et al. 1993)       |
| <i>Tropaeolum majus</i>     | H | 0 | GCGH | None                | T1      | (Lake & Hughes 1999)        |
| <i>Tsuga canadensis</i>     | W | 0 | GCGH | None                | F1/T1   | (Bazzaz et al. 1990)        |
| <i>Tsuga canadensis</i>     | W | 0 | GCGH | None                | T1      | (Godbold et al. 1997)       |
| <i>Vaccinium uliginosum</i> | W | 0 | GCGH | None/Fert           | F19/F20 | (Oechel et al. 1984)        |
| <i>Veronica didyma</i>      | H | 0 | GCGH | Fert                | F1      | (Tang et al. 2006)          |
| <i>Vicia cracca</i>         | H | 1 | GCGH | Fert                | F1      | (Tang et al. 2006)          |
| <i>Vicia faba</i>           | H | 1 | GCGH | None/Herbivory      | F1/F3   | (Hughes & Bazzaz 2001)      |
| <i>Vicia faba</i>           | H | 1 | OTC  | None                | F2      | (Radoglou & Jarvis 1993)    |
| <i>Vicia faba</i>           | H | 1 | GCGH | None/UVB            | T1      | (Tosserams et al. 2001)     |
| <i>Vicia faba</i>           | H | 1 | OTC  | None                | T1      | (Visser et al. 1997)        |
| <i>Vicia faba</i>           | H | 1 | GCGH | None/Fert           | F1      | (Wolf 1996a)                |
| <i>Vigna unguiculata</i>    | H | 1 | GCGH | None                | F6      | (Bhattacharya et al. 1985b) |

|                            |   |   |      |            |       |                          |
|----------------------------|---|---|------|------------|-------|--------------------------|
| <i>Vigna unguiculata</i>   | H | 1 | GCGH | None       | F1    | (Overdieck et al. 1988)  |
| <i>Virola surinamensis</i> | W | 0 | OTC  | None       | T1    | (Winter & Lovelock 1999) |
| <i>Xanthium strumarium</i> | H | 0 | GCGH | None       | F1    | (Lewis et al. 2003)      |
| <i>Zea mays</i>            | H | 0 | GCGH | None       | T1    | (Hocking & Meyer 1991)   |
| <i>Zea mays</i>            | H | 0 | GCGH | None/Water | T2    | (Kang et al. 2002)       |
| <i>Zea mays</i>            | H | 0 | GCGH | None/Water | T4    | (King & Greer 1986)      |
| <i>Zea mays</i>            | H | 0 | GCGH | None       | T1/T3 | (Patterson & Flint 1980) |
| <i>Zea mays</i>            | H | 0 | GCGH | None       | F2    | (Sionit et al. 1982)     |
| <i>Zea mays</i>            | H | 0 | GCGH | None       | T1    | (Ziska & Bunce 1999)     |
| <i>Zea mays</i>            | H | 0 | GCGH | None       | T4    | (Ziska & Bunce 1997a)    |

---

## Appendix References

- Allard V, Robin C, Newton PCD, Lieffering M, Soussana JF (2006) Short and long-term effects of elevated CO<sub>2</sub> on *Lolium perenne* rhizodeposition and its consequence on soil organic matter turnover and plant N yield. *Soil Biology and Biochemistry* 38:1178-1187
- Allen LH, Jr, Vu JCV, Valle RR, Boote KJ, Jones PH (1988) Nonstructural carbohydrates and nitrogen of soybean grown under carbon dioxide enrichment. *Crop Science* 28:84-94
- Almeida JPF, Luscher A, Frehner M, Oberson A, Nosberger J (1999) Partitioning of P and the activity of root acid phosphatase in white clover (*Trifolium repens* L.) are modified by increased atmospheric CO<sub>2</sub> and P fertilisation. *Plant and Soil* 210:159-166
- Amthor JS, Mitchell RJ, Runion GB (1994) Energy content, construction cost and phytomass accumulation of *Glycine max* (L.) Merr. and *Sorghum bicolor* (L.) Moench grown in elevated CO<sub>2</sub> in the field. *New Phytologist* 128:443-450
- Anderson PD, Tomlinson PT (1998) Ontogeny affects response of northern red oak seedlings to elevated CO<sub>2</sub> and water stress. *New Phytologist* 140:477-491
- Andre M, Cotte F, Gerbaud A, Massimino D, Massimino J, Richaud C (1989) Effect of CO<sub>2</sub> and O<sub>2</sub> on development and fructification of wheat in closed systems. *Advances in Space Research* 9(8):17-28
- Aoki N, Ono K, Seneweera SP, Sakai H, Kobayashi K, Ishimaru K (2003) Effects of elevated CO<sub>2</sub> concentration on photosynthetic carbon metabolism in flag-leaf blades of rice before and after heading. *Plant Production Science* 6:52-58
- Aranda X, Agusti C, Joffre R, Fleck I (2006) Photosynthesis, growth and structural characteristics of holm oak resprouts originated from plants grown under elevated CO<sub>2</sub>. *Physiologia Plantarum* 128:302-312
- Arnone JA, III, Gordon JC (1990) Effect of nodulation, nitrogen fixation and CO<sub>2</sub> enrichment on the physiology, growth and dry mass allocation of seedlings of *Alnus rubra* Bong. *New Phytologist* 116:55-66
- Arnone JA, III, Körner C (1993) Influences of elevated CO<sub>2</sub> on canopy development and red: far-red ratios in two-storied stands of *Ricinus communis*. *Oecologia* 94:510-515
- Arnone JA, III, Kestenholtz C (1997) Root competition and elevated CO<sub>2</sub>: effects on seedling growth in *Linum usitatissimum* populations and *Linum-Silene cretica* mixtures. *Functional Ecology* 11:209-214
- Arnone JA, III, Körner C (1995) Soil and biomass carbon pools in model communities of tropical plants under elevated CO<sub>2</sub>. *Oecologia* 104:61-71
- Atkin OK, Schortemeyer M, McFarlane N, Evans JR (1999) The response of fast- and slow-growing *Acacia* species to elevated atmospheric CO<sub>2</sub>: an analysis of the underlying components of relative growth rate. *Oecologia* 120:544-554
- Atkinson CJ, Taylor JM, Wilkins D, Besford RT (1997) Effects of elevated CO<sub>2</sub> on chloroplast components, gas exchange and growth of oak and cherry. *Tree Physiology* 17:319-325
- Bacanamwo M, Harper JE (1997) Response of a hypernodulating soybean mutant to increased photosynthate supply. *Plant Science* 124:119-129

- Baker JM, Albercht SL, Pan D, Allen LH, Pickering NB, Boote KJ (1994) Carbon dioxide and temperature effects on rice (*Oryza sativa* L., cv. 'IR-72'). Soil and Crop Science Society of Florida Proceedings 53:90-97
- Baker JT, Allen Jr. LH, Boote KJ (1990) Growth and yield responses of rice to carbon dioxide concentration. Journal of Agricultural Science 115:313-320
- Barnard R, Barthes L, Le Roux X, Leadley PW (2004) Dynamics of nitrifying activities, denitrifying activities and nitrogen in grassland mesocosms as altered by elevated CO<sub>2</sub>. New Phytologist 162:365-376
- Barnard R, Barthes L, Leadley PW (2006) Short-term uptake of <sup>15</sup>N by a grass and soil micro-organisms after long-term exposure to elevated CO<sub>2</sub>. Plant and Soil 280:91-99
- Barnard R, Leadley PW, Lensi R, Barthes L (2005) Plant, soil microbial and soil inorganic nitrogen responses to elevated CO<sub>2</sub>: a study in microcosms of *Holcus lanatus*. Acta Oecologica 27:171-178
- Barnes JD, Ollerenshaw JH, Whitfield CP (1995) Effects of elevated CO<sub>2</sub> and/or O<sub>3</sub> on growth, development and physiology of wheat (*Triticum aestivum* L.). Global Change Biology 1:129-142
- Barrett DJ, Gifford RM (1999) Increased C-gain by an endemic Australian pasture grass at elevated atmospheric CO<sub>2</sub> concentration when supplied with non-labile inorganic phosphorus. Australian Journal of Plant Physiology 26:443-451
- BassiriRad H, Griffin KL, Reynolds JF, Strain BR (1997a) Changes in root NH<sub>4</sub><sup>+</sup> and NO<sub>3</sub><sup>-</sup> absorption rates of loblolly and ponderosa pine in response to CO<sub>2</sub> enrichment. Plant and Soil 190:1-9
- BassiriRad H, Griffin KL, Strain BR, Reynolds JF (1996a) Effects of CO<sub>2</sub> enrichment on growth and root <sup>15</sup>NH<sub>4</sub><sup>+</sup> uptake rate of loblolly pine and ponderosa pine seedlings. Tree Physiology 16:957-962
- BassiriRad H, Reynolds JF, Virginia RA, Brunelle MH (1997b) Growth and root NO<sub>3</sub><sup>-</sup> and PO<sub>4</sub><sup>3-</sup> uptake capacity of three desert species in response to atmospheric CO<sub>2</sub> enrichment. Australian Journal of Plant Physiology 24:353-358
- BassiriRad H, Tissue DT, Reynolds JF, Chapin FS, III (1996b) Response of *Eriophorum vaginatum* to CO<sub>2</sub> enrichment at different soil temperatures: effects on the growth, root respiration and PO<sub>4</sub><sup>3-</sup> uptake kinetics. New Phytologist 133:423-430
- Bassow SL, McConnaughay KDM, Bazzaz FA (1994) The response of temperate tree seedlings grown in elevated CO<sub>2</sub> to extreme temperature events. Ecological Applications 4:593-603
- Bauer GA, Berntson GM (2001) Ammonium and nitrate acquisition by plants in response to elevated CO<sub>2</sub> concentration: the roles of root physiology and architecture. Tree Physiology 21:137-144
- Baxter R, Ashenden TW, Farrar JF (1997) Effect of elevated CO<sub>2</sub> and nutrient status on growth, dry matter partitioning and nutrient content of *Poa alpina* var. *vivipara* L. Journal of Experimental Botany 48:1477-1486
- Baxter R, Ashenden TW, Sparks TH, Farrar JF (1994) Effects of elevated carbon dioxide on three montane grass species. I. Growth and dry matter partitioning. Journal of Experimental Botany 45:305-315
- Bazin A, Goverde M, Erhardt A, Shykoff JA (2002) Influence of atmospheric carbon dioxide enrichment on induced response and growth compensation after herbivore damage in *Lotus corniculatus*. Ecological Entomology 27:271-278

- Bazot S, Ulf L, Blum H, Nguyen C, Robin C (2006) Effects of elevated CO<sub>2</sub> concentration on rhizodeposition from *Lolium perenne* grown on soil exposed to 9 years of CO<sub>2</sub> enrichment. *Soil Biology and Biochemistry* 38:729-736
- Bazzaz FA, Coleman JS, Morse SR (1990) Growth responses of seven major co-occurring tree species of the northeastern United States to elevated CO<sub>2</sub>. *Canadian Journal of Forest Research* 20:1479-1484
- Bazzaz FA, Garbut K, Reekie EG, Williams WE (1989) Using growth analysis to interpret competition between a C<sub>3</sub> and a C<sub>4</sub> annual under ambient and elevated CO<sub>2</sub>. *Oecologia* 79:223-235
- Bencze S, Veisz O, Janda T, Bedo Z (2000) Effects of elevated CO<sub>2</sub> level and N and P supplies on two winter wheat varieties in the early developmental stage. *Cereal Research Communications* 28:123-130
- Bernacchi CJ, Coleman JS, Bazzaz FA, McConnaughay KDM (2000) Biomass allocation in old-field annual species grown in elevated CO<sub>2</sub> environments: no evidence for optimal partitioning. *Global Change Biology* 6:855-863
- Bernston GM, Bazzaz FA (1997) Nitrogen cycling in microcosms of yellow birch exposed to elevated CO<sub>2</sub>: simultaneous positive and negative below-ground feedbacks. *Global Change Biology* 3:247-258
- Bernston GM, Bazzaz FA (1998) Regenerating temperate forest mesocosms in elevated CO<sub>2</sub>: belowground growth and nitrogen cycling. *Oecologia* 113:115-125
- Berntson GM, Rajakaruna N, Bazzaz FA (1998) Growth and nitrogen uptake in an experimental community of annuals exposed to elevated atmospheric CO<sub>2</sub>. *Global Change Biology* 4:607-626
- Berntson GM, Wayne P, Bazzaz FA (1997) Below-ground architectural and mycorrhizal responses to elevated CO<sub>2</sub> in *Betula alleghaniensis* populations. *Functional Ecology* 11:684-695
- Berryman CA, Eamus D, Duff GA (1993) The influence of CO<sub>2</sub> enrichment on growth, nutrient content and biomass allocation of *Maranthus corymbosa*. *Australian Journal of Botany* 41:195-209
- Bhattacharya NC, Biswas PK, Bhattacharya S, Sionit N, Strain BR (1985a) Growth and yield response of sweet potato to atmospheric CO<sub>2</sub> enrichment. *Crop Science* 25:975-981
- Bhattacharya NC, Hileman DR, Ghosh PP, Musser RL, Bhattacharya S, Biswas PK (1990) Interaction of enriched CO<sub>2</sub> and water-stress on the physiology of and biomass production in sweet-potato grown in open-top chambers. *Plant, Cell and Environment* 13:933-940
- Bhattacharya S, Bhattacharya NC, Biswas PK, Strain BR (1985b) Response of cow pea (*Vigna unguiculata* L.) to CO<sub>2</sub> enrichment environment on growth, dry-matter production and yield components at different stages of vegetative and reproductive growth. *Journal of Agricultural Science* 105:527-534
- Billes G, Rouhier H, Bottner P (1993) Modifications of the carbon and nitrogen allocations in the plant (*Triticum aestivum* L.) soil system in response to increased atmospheric CO<sub>2</sub> concentration. *Plant and Soil* 157:215-225
- Blaschke L, Legrand M, Mai C, Polle A (2004) Lignification and structural biomass production in tobacco with suppressed caffeic/5-hydroxy ferulic acid-O-methyl transferase activity under ambient and elevated CO<sub>2</sub> concentrations. *Physiologia Plantarum* 121:75-83
- Bloom AJ, Smart DR, Nguyen DT, Searles PS (2002) Nitrogen assimilation and growth of wheat under elevated carbon dioxide. *Proceedings of the National Academy of Sciences of the United States of America* 99:1730-1735

- Booker FL, Fiscus EL (2005) The role of ozone flux and antioxidants in the suppression of ozone injury by elevated CO<sub>2</sub> in soybean. *Journal of Experimental Botany* 56:2139-2151
- Bosac C, Gardner SDL, Taylor G, Wilkins D (1995) Elevated CO<sub>2</sub> and hybrid poplar: a detailed investigation of root and shoot growth and physiology of *Populus euramericana*, 'Primo'. *Forest Ecology and Management* 74:103-116
- Broadmeadow MJ, Jackson SB (2000) Growth responses of *Quercus petraea*, *Fraxinus excelsior* and *Pinus sylvestris* to elevated carbon dioxide, ozone and water supply. *New Phytologist* 146:437-451
- Broadmeadow MSJ, Heath J, Randle TJ (1999) Environmental limitations to O<sub>3</sub> uptake-some key results from young trees growing at elevated CO<sub>2</sub> concentrations. *Water, Air, and Soil Pollution* 116:299-310
- Brown K, Higginbotham KO (1986) Effects of carbon dioxide enrichment and nitrogen supply on growth of boreal tree seedlings. *Tree Physiology* 2:223-232
- Bucher JB, Tarjan DP, Siegwolf RTW, Saurer M, Blum H, Hendrey GR (1998) Growth of a deciduous tree seedling community in response to elevated CO<sub>2</sub> and nutrient supply. *Chemosphere* 36:777-782
- Bunce JA (1990) Short- and long-term inhibition of respiratory carbon dioxide efflux by elevated carbon dioxide. *Annals of Botany* 65:637-642
- Cabrerizo PM, Gonzalez EM, Aparicio-Tejo PM, Arrese-Igor C (2001) Continuous CO<sub>2</sub> enrichment leads to increased nodule biomass, carbon availability to nodules and activity of carbon-metabolising enzymes but does not enhance specific nitrogen fixation in pea. *Physiologia Plantarum* 113:33-40
- Calfapietra C et al. (2003) Free-air CO<sub>2</sub> enrichment (FACE) enhances biomass production in a short-rotation poplar plantation. *Tree Physiology* 23:805-814
- Callaway RM, DeLucia EH, Thomas EM, Schlesinger WH (1994) Compensatory responses of CO<sub>2</sub> exchange and biomass allocation and their effects on the relative growth rate of ponderosa pine in different CO<sub>2</sub> and temperature regimes. *Oecologia* 98:159-166
- Campbell CD, Sage RF (2002) Interactions between atmospheric CO<sub>2</sub> concentration and phosphorus nutrition on the formation of proteoid roots in white lupin (*Lupinus albus* L.). *Plant, Cell and Environment* 25:1051-1059
- Cantin D, Tremblay MF, Lechowicz MJ, Potvin C (1996) Effect of CO<sub>2</sub> enrichment, elevated temperature, and nitrogen availability on the growth and gas exchange of different families of jack pine seedlings. *Canadian Journal of Forest Research* 27:510-520
- Cao W, Tibbitts TW, Wheeler RM (1994) Carbon dioxide interactions with irradiance and temperature in potatoes. *Advances in Space Research* 14:243-250
- Carlson RW, Bazzaz FA (1982) Photosynthetic and growth response to fumigation with SO<sub>2</sub> at elevated CO<sub>2</sub> for C<sub>3</sub> and C<sub>4</sub> plants. *Oecologia* 54:50-54
- Carswell FE, Grace J, Lucas ME, Jarvis PG (2000) Interaction of nutrient limitation and elevated CO<sub>2</sub> concentration on carbon assimilation of a tropical tree seedling (*Cedrela odorata*). *Tree Physiology* 20:977-986
- Carter DR, Peterson KM (1983) Effects of a CO<sub>2</sub>-enriched atmosphere on the growth and competitive interaction of a C<sub>3</sub> and a C<sub>4</sub> grass. *Oecologia* 58:188-193

- Carter EB, Theodorou MK, Morris P (1997) Responses of *Lotus corniculatus* to environmental change I. Effects of elevated CO<sub>2</sub>, temperature and drought on growth and plant development. *New Phytologist* 136:245-253
- Causin HF, Tremmel DC, Rufty TW, Reynolds JF (2004) Growth, nitrogen uptake, and metabolism in two semiarid shrubs grown at ambient and elevated atmospheric CO<sub>2</sub> concentration: effects of nitrogen supply and source. *American Journal of Botany* 91:565-572
- Cavender-Bares J, Potts M, Zacharias E, Bazzaz FA (2000) Consequences of CO<sub>2</sub> and light interactions for leaf phenology, growth, and senescence in *Quercus rubra*. *Global Change Biology* 6:877-887
- Cen YP, Layzell DB (2004) Does oxygen limit nitrogenase activity in soybean exposed to elevated CO<sub>2</sub>? *Plant, Cell and Environment* 27:1229-1238
- Centritto M (2000) Source-sink relations affect growth but not the allocation pattern (*Betula pendula* Roth) seedlings under elevated CO<sub>2</sub>. *Plant Biosystems* 134:31-37
- Centritto M, Lee HJL, Jarvis PG (1999) Long-term effects of elevated carbon dioxide concentration and provenance on four clones of Sitka spruce (*Picea sitchensis*) I. Plant growth, allocation and ontogeny. *Tree Physiology* 19:799-806
- Centritto M, Lucas ME, Jarvis PG (2002) Gas exchange, biomass, whole-plant water-use efficiency and water uptake of peach (*Prunus persica*) seedlings in response to elevated carbon dioxide concentration and water availability. *Tree Physiology* 22:699-706
- Chaudhuri UN, Burnett RB, Kirkham MB, Kanemasu ET (1986) Effect of carbon dioxide on sorghum yield, root growth, and water use. *Agricultural and Forest Meteorology* 37:109-122
- Chaudhuri UN, Kirkham MB, Kanemasu ET (1990) Root growth of winter wheat under elevated carbon dioxide and drought. *Crop Science* 30:853-857
- Chen CT, Setter TL (2003) Response of potato tuber cell division and growth to shade and elevated CO<sub>2</sub>. *Annals of Botany* 91:373-381
- Chen K, Hu G, Keutgen N, Lenz F (1997) Effects of CO<sub>2</sub> concentration on strawberry. III. Dry matter production and water consumption. *Angewandte Botanik* 71:179-182
- Chen K, Hu GQ, Keutgen N, Janssens JJ, Lenz F (1999) Effects of NaCl salinity and CO<sub>2</sub> enrichment on pepino (*Solanum muricatum* Ait) I. Growth and yield. *Scientia Horticulturae* 81:25-41
- Chen K, Hu GQ, Lenz F (2002) Effects of doubled atmospheric CO<sub>2</sub> concentration on apple trees. II. Dry mass production. *Gartenbauwissenschaft* 67:28-33
- Chen K, Lenz F (1997) Responses of strawberry to doubled CO<sub>2</sub> concentration and phosphorus deficiency I. Distribution of dry matter, macronutrients, and carbohydrates. *Gartenbauwissenschaft* 62:30-37
- Cheng WG, Yagi K, Sakai H, Kobayashi K (2006) Effects of elevated atmospheric CO<sub>2</sub> concentrations on CH<sub>4</sub> and N<sub>2</sub>O emission from rice soil: an experiment in controlled-environment chambers. *Biogeochemistry* 77:351-373
- Choi DS, Quoreshi AM, Maruyama Y, Jin HO, Koike T (2005) Effect of ectomycorrhizal infection on growth and photosynthetic characteristics of *Pinus densiflora* seedlings grown under elevated CO<sub>2</sub> concentrations *Photosynthetica* 43:223-229
- Christ RA, Körner C (1995) Responses of shoot and root gas exchange, leaf blade expansion and biomass production to pulses of elevated CO<sub>2</sub> in hydroponic wheat. *Journal of Experimental Botany* 46:1661-1667

- Chu CC, Coleman JSM, H.A. (1992) Controls of biomass partitioning between roots and shoots: atmospheric CO<sub>2</sub> enrichment and the acquisition and allocation of carbon and nitrogen in a wild radish. *Oecologia* 89:580-587
- Clifford SC, Stronach IM, Mohamed AD, Azam-Ali SN, Crout NMJ (1993) The effects of elevated atmospheric carbon dioxide and water stress on light interception, dry matter production and yield in stands of groundnut (*Arachis hypogaea* L.). *Journal of Experimental Botany* 44:1763-1770
- Coleman JS, Bazzaz FA (1992) Effects of CO<sub>2</sub> and temperature on growth and resource use of co-occurring C<sub>3</sub> and C<sub>4</sub> annuals. *Ecology* 73:1244-1259
- Conroy J, Barlow EWR (1986) Response of *Pinus radiata* seedlings to carbon dioxide enrichment at different levels of water and phosphorus: growth, morphology and anatomy. *Annals of Botany* 57:165-177
- Conroy JP, Milham PJ, Barlow EWR (1992) Effect of nitrogen and phosphorus availability on the growth response of *Eucalyptus grandis* to high CO<sub>2</sub>. *Plant, Cell and Environment* 15:843-847
- Conroy JP, Milham PJ, Mazur M, Barlow EWR (1990) Growth, dry weight partitioning and wood properties of *Pinus radiata* D. Don after 2 years of CO<sub>2</sub> enrichment. *Plant, Cell and Environment* 13:329-337
- Cortes P, Espelta JM, Save R, Biel C (2004) Effects of a nursery CO<sub>2</sub> enriched atmosphere on the germination and seedling morphology of two Mediterranean oaks with contrasting leaf habit. *New Forests* 28:79-88
- Cotrufo MF, Gorissen A (1997) Elevated CO<sub>2</sub> enhances below-ground C allocation in three perennial grass species at different levels of N availability. *New Phytologist* 137:421-431
- Craigon J et al. (2002) Growth and marketable-yield responses of potato to increased CO<sub>2</sub> and ozone. *European Journal of Agronomy* 17:273-289
- Cruz C, Lips SH, Martins-Loucao MA (1997) Changes in the morphology of roots and leaves of Carob seedlings induced by nitrogen source and atmospheric carbon dioxide. *Annals of Botany* 80:817-823
- Cui M, Nobel PS (1994) Gas exchange and growth responses to elevated CO<sub>2</sub> and light levels in the CAM species *Opuntia ficus-indica*. *Plant, Cell and Environment* 17:935-944
- Cure JD, Israel DW, Rufty Jr. TW (1988) Nitrogen stress effects on growth and seed yield of nonnodulated soybean exposed to elevated carbon dioxide. *Crop Science* 28:671-677
- Cure JD, Rufty Jr. TW, Israel DW (1987) Assimilate utilization in the leaf canopy and whole-plant growth of soybean during acclimation to elevated CO<sub>2</sub>. *Botanical Gazette* 148:67-72
- Daepf M, Nosberger J, Luscher A (2001) Nitrogen fertilization and developmental stage alter the response of *Lolium perenne* to elevated CO<sub>2</sub>. *New Phytologist* 150:347-358
- Dakora FD, Drake BG (2000) Elevated CO<sub>2</sub> stimulates associative N<sub>2</sub> fixation in a C<sub>3</sub> plant of the Chesapeake Bay wetland. *Plant, Cell and Environment* 23:943-953
- Dale H, Press MC (1998) Elevated atmospheric CO<sub>2</sub> influences the interaction between the parasitic angiosperm *Orobanche minor* and its host *Trifolium repens*. *New Phytologist* 140:65-73

- Damesin C, Galera C, Rambal S, Joffre R (1996) Effects of elevated carbon dioxide on leaf gas exchange and growth of cork-oak (*Quercus suber* L.) seedlings. *Annals of Forest Science* 53:461-467
- De Costa WAJM, Weerakoon WMW, Herath HMLK, Abeywardena RMI (2003) Response of growth and yield of rice (*Oryza sativa*) to elevated carbon dioxide in the subhumid zone of Sri Lanka. *Journal of Agronomy and Crop Science* 189:83-95
- De Luis I, Irigoyen JJ, Sanchez-Diaz M (2002) Low vapour pressure deficit reduces the beneficial effect of elevated CO<sub>2</sub> on growth of N<sub>2</sub>-fixing alfalfa plants. *Physiologia Plantarum* 116:497-502
- Deckmyn G, Caeyenberghs E, Cuelemans R (2001) Reduced UV-B in greenhouses decreases white clover response to enhance CO<sub>2</sub>. *Environmental and Experimental Botany* 46:109-117
- Delucia EH, Sasek TW, Strain BR (1985) Photosynthetic inhibition after long-term exposure to elevated levels of atmospheric carbon dioxide. *Photosynthesis Research* 7:175-184
- Demmers-Derks H, Mitchell RAC, Mitchell VJ, Lawlor DW (1998) Response of sugar beet (*Beta vulgaris* L.) yield and biochemical composition to elevated CO<sub>2</sub> and temperature at two nitrogen applications. *Plant, Cell and Environment* 21:829-836
- Deng X, Woodward FI (1998) The growth and yield response of *Fragaria ananassa* to elevated CO<sub>2</sub> and N supply. *Annals of Botany* 81:67-71
- Derner JD et al. (2003) Above- and below-ground responses of C<sub>3</sub>-C<sub>4</sub> species mixtures to elevated CO<sub>2</sub> and soil water availability. *Global Change Biology* 9:452-460
- Derner JD, Tischler CR, Polley HW, Johnson HB (2004) Intergenerational above- and belowground responses of spring wheat (*Triticum aestivum* L.) to elevated CO<sub>2</sub>. *Basic and Applied Ecology* 5:145-152
- Derner JD, Tischler CR, Polley HW, Johnson HB (2005) Seedling growth of two honey mesquite varieties under CO<sub>2</sub> enrichment. *Rangeland Ecology and Management* 58:292-298
- Desjardins Y, Gosselin A, Lamarre M (1990) Growth of transplants and in vitro-cultured clones of asparagus in response to CO<sub>2</sub> enrichment and supplemental lighting. *Journal of the American Society of Horticultural Science* 115:364-368
- Dickson RE, Coleman MD, Riemenschneider DE, Isebrands JG, Hogan GD, Karnosky DF (1998) Growth of five hybrid poplar genotypes exposed to interacting elevated CO<sub>2</sub> and O<sub>3</sub>. *Canadian Journal of Forest Research* 28:1706-1716
- Dijkstra P, Schapendonk AHMC, Groenwold K, Jansen M, Van De Geijn SC (1999) Seasonal changes in the response of winter wheat to elevated atmospheric CO<sub>2</sub> concentration grown in open-top chambers and field tracking enclosures. *Global Change Biology* 5:563-576
- Dippery JK, Tissue DT, Thomas RB, Strain BR (1995) Effects of low and elevated CO<sub>2</sub> on C<sub>3</sub> and C<sub>4</sub> annuals. *Oecologia* 101:13-20
- Donnelly A, Craigson J, Black CR, Colls JJ, Landon G (2001) Elevated CO<sub>2</sub> increases biomass and tuber yield in potato even at high ozone concentrations. *New Phytologist* 149:265-274
- Downton WJS, Grant WJR (1994) Photosynthetic and growth responses of variegated ornamental species to elevated CO<sub>2</sub>. *Australian Journal of Plant Physiology* 21:273-279
- Downton WJS, Grant WJR, Chako EK (1990) Effect of elevated carbon dioxide on the photosynthesis and early growth of mangosteen (*Garcinia mangostana* L.). *Scientia Horticulturae* 44:215-225

- Downton WJS, Grant WJR, Loveys BR (1987) Carbon dioxide enrichment increases yield of Valencia Orange. *Australian Journal of Plant Physiology* 14:493-501
- Druta A (2001) Effect of long term exposure to high CO<sub>2</sub> concentrations on photosynthetic characteristics of *Prunus avium* L. *Plants. Photosynthetica* 39:289-297
- Ducloux HC, Andre M, Daguene A, Massimino J (1987) Wheat response to CO<sub>2</sub> enrichment - growth and CO<sub>2</sub> exchanges at 2 plant densities. *Journal of Experimental Botany* 38:1421-1431
- Duff GA, Berryman CA, Eamus D (1994) Growth, biomass allocation and foliar nutrient contents of two Eucalyptus species of the wet-dry tropics of Australia grown under CO<sub>2</sub> enrichment. *Functional Ecology* 8:502-508
- Dukes JS et al. (2005) Responses of grassland production to single and multiple global environmental changes. *PLoS Biology* 3:1829-1837
- Edwards EJ, McCaffery S, Evans JR (2005) Phosphorus status determines biomass response to elevated CO<sub>2</sub> in a legume; C<sub>4</sub> grass community. *Global Change Biology* 11:1968-1981
- Egli P, Körner C (1997) Growth responses to elevated CO<sub>2</sub> and soil quality in beech-spruce model ecosystems. *Acta Oecologica* 18:343-349
- El Kohen A, Mousseau M (1994) Interactive effects of elevated CO<sub>2</sub> and mineral nutrition on growth and CO<sub>2</sub> exchange of sweet chestnut (*Castanea sativa*). *Tree Physiology* 14:679-690
- El Kohen A, Rouhier H, Mousseau M (1992) Changes in dry weight and nitrogen partitioning induced by elevated CO<sub>2</sub> depend on soil nutrient availability in sweet chestnut (*Castanea sativa* Mill). *Annales des Sciences Forestieres* 49:83-90
- El Kohen A, Venet L, Mousseau M (1993) Growth and photosynthesis of two deciduous forest species at elevated carbon dioxide. *Functional Ecology* 7:480-486
- Entry JA, Runion GB, Prior SA, Mitchell RJ, Rogers HH (1998) Influence of CO<sub>2</sub> enrichment and nitrogen fertilization on tissue chemistry and carbon allocation in longleaf pine seedlings. *Plant and Soil* 200:3-11
- Fajer ED, Bowers MD, Bazzaz FA (1991) Performance and allocation patterns of the perennial herb, *Plantago lanceolata*, in response to simulated herbivory and elevated CO<sub>2</sub> environments. *Oecologia* 87:37-42
- Fangmeier A, de Temmerman L, Black C, Persson K, Vorne V (2002) Effects of elevated CO<sub>2</sub> and/or ozone on nutrient concentrations and nutrient uptake of potatoes. *European Journal of Agronomy* 17:353-368
- Fangmeier A, Gruters U, Herstein U, Sandhage-Hofmann A, Vermehren B, Jager HJ (1996) Effects of elevated CO<sub>2</sub>, nitrogen supply and tropospheric ozone on spring wheat. 1. Growth and yield. *Environmental Pollution* 91:381-390
- Farnsworth EJ, Bazzaz FA (1995) Inter- and intra-generic differences in growth, reproduction, and fitness of nine herbaceous annual species grown in elevated CO<sub>2</sub> environments. *Oecologia* 104:454-466
- Ferguson JJ, Avigne WT, Allen LH, Koch KE (1986) Growth of CO<sub>2</sub>-enriched sour orange seedlings treated with gibberellins/cytokinins. *Proceedings of Florida State Horticultural Society* 99:37-39
- Fernandez MD, Tezara W, Rengifo E, Herrera A (2002) Lack of downregulation of photosynthesis in a tropical root crop, cassava, grown under an elevated CO<sub>2</sub> concentration. *Functional Plant Biology* 29:805-814

- Ferris R, Taylor G (1993) Contrasting effects of elevated CO<sub>2</sub> on the root and shoot growth of four native herbs commonly found in chalk grassland. *New Phytologist* 125:855-866
- Ferris R, Taylor G (1995) Contrasting effects of elevated CO<sub>2</sub> and water deficit on two native herbs. *New Phytologist* 131:491-501
- Fierro A, Tremblay N, Gosselin A (1994) Supplemental carbon dioxide and light improved tomato and pepper seedling growth and yield. *HortScience* 29:152-154
- Fitter AH et al. (1997) Root production and turnover and carbon budgets of two contrasting grasslands under ambient and elevated atmospheric carbon dioxide concentrations. *New Phytologist* 137:247-255
- Flynn DFB, Sudderth EA, Bazzaz FA (2006) Effects of herbivory on biomass and leaf-level physiology of *Solanum dulcamara* under elevated temperature and CO<sub>2</sub>. *Environmental and Experimental Botany* 56:10-18
- Fordham M et al. (1997) The impact of elevated CO<sub>2</sub> on growth and photosynthesis in *Agrostis canina* L. ssp. *monteluccii* adapted to contrasting atmospheric CO<sub>2</sub> concentrations. *Oecologia* 110:169-178
- Fransson PMA, Taylor AFS, Finlay RD (2005) Mycelial production, spread and root colonisation by the ectomycorrhizal fungi *Hebeloma crustuliniforme* and *Paxillus involutus* under elevated atmospheric CO<sub>2</sub>. *Mycorrhiza* 15
- Fritschi FB, Boote KJ, Sollenberger LE, Allen LH, Jr., Sinclair TR (1999) Carbon dioxide and temperature effects on forage establishment: photosynthesis and biomass production. *Global Change Biology* 5:441-453
- Garcia-Sanchez F, Syvertsen JP (2006) Salinity tolerance of Cleopatra mandarin and Carrizo citrange citrus rootstock seedlings is affected by CO<sub>2</sub> enrichment during growth. *Journal of the American Society of Horticultural Science* 131:24-31
- Gaucher C, Dizengremel P, Mauffette Y, Chevrier N (2005) Response of *Acer saccharum* seedlings to elevated O<sub>3</sub> and CO<sub>2</sub> concentrations. *Phytoprotection* 86:1-17
- Gavazzi M, Seiler J, Aust W, Zedaker S (2000) The influence of elevated carbon dioxide and water availability on herbaceous weed development and growth of transplanted loblolly pine (*Pinus taeda*). *Environmental and Experimental Botany* 44:185-194
- Gavito ME, Bruhn D, Jakobsen I (2002) Phosphorus uptake by arbuscular mycorrhizal hyphae does not increase when the host plant grows under atmospheric CO<sub>2</sub> enrichment. *New Phytologist* 154:751-760
- Gavito ME, Curtis PS, Mikkelsen TN, Jakobsen I (2000) Atmospheric CO<sub>2</sub> and mycorrhiza effects on biomass allocation and nutrient uptake of nodulated pea (*Pisum sativum* L.) plants. *Journal of Experimental Botany* 51:1931-1938
- Gavito ME, Schweiger P, Jakobsen I (2003) P uptake by arbuscular mycorrhizal hyphae: effect of soil temperature and atmospheric CO<sub>2</sub> enrichment. *Global Change Biology* 9:106-116
- Gay AP, Hauck B (1994) Acclimation of *Lolium-temulentum* to enhanced carbon-dioxide concentration. *Journal of Experimental Botany* 45:1133-1141
- George V, Gerant D, Dizengremel P (1996) Photosynthesis, rubisco activity and mitochondrial malate oxidation in pedunculate oak (*Quercus robur* L) seedlings grown under present and elevated atmospheric CO<sub>2</sub> concentrations. *Annals of Forest Science* 53:469-474
- Ghannoum O, Conroy JP (1998) Nitrogen deficiency precludes a growth response to CO<sub>2</sub> enrichment in C-3 and C-4 Panicum grasses. *Australian Journal of Plant Physiology* 25:627-636

- Ghannoum O, von Caemmerer S, Barlow EWR, Conroy JP (1997) The effect of CO<sub>2</sub> enrichment and irradiance on the growth, morphology and gas exchange of a C<sub>3</sub> (*Panicum laxum*) and C<sub>4</sub> (*Panicum antidotale*) grass. *Australian Journal of Plant Physiology* 24:227-237
- Gibeaut DM, Cramer GR, Seemann JR (2001) Growth, cell walls, and UDP-Glc dehydrogenase activity of *Arabidopsis thaliana* grown in elevated carbon dioxide. *Journal of Plant Physiology* 158:569-576
- Gifford RM (1979) Growth and yield of CO<sub>2</sub>-enriched wheat under water-limited conditions. *Australian Journal of Plant Physiology* 6:367-378
- Gislerod HR, Nelson PV (1989) The interaction of relative air humidity and carbon dioxide enrichment in the growth of *Chrysanthemum X morifolium* Ramat. *Scientia Horticulturae* 38:305-313
- Gleadow RM, Foley WJ, Woodrow IE (1998) Enhanced CO<sub>2</sub> alters the relationship between photosynthesis and defence in cyanogenic *Eucllyptus cladocalyx* F. Muell. *Plant, Cell and Environment* 21:12-22
- Gloser J, Bartak M (1994) Net photosynthesis, growth rate and biomass allocation in a rhizomatous grass *Calamagrostis epigejos* grown at elevated CO<sub>2</sub> concentration. *Photosynthetica* 30:143-150
- Gloser V, Frehner M, Luscher A, Nosberger J, Hartwig UA (2001) Does the response of perennial ryegrass to elevated CO<sub>2</sub> concentration depend on the form of the supplied nitrogen? *Biologia Plantarum* 45:51-58
- Godbold DL, Berntson GM, Bazzaz FA (1997) Growth and mycorrhizal colonization of three North American tree species under elevated atmospheric CO<sub>2</sub>. *New Phytologist* 137:433-440
- Goodfellow J, Eamus D, Duff G (1997) Diurnal and seasonal changes in the impact of CO<sub>2</sub> enrichment on assimilation, stomatal conductance and growth in a long-term study of *Mangifera indica* in the wet-dry tropics of Australia. *Tree Physiology* 17:291-299
- Gorissen A (1996) Elevated CO<sub>2</sub> evokes quantitative and qualitative changes in carbon dynamics in a plant/soil system: mechanisms and implications. *Plant and Soil* 187:289-298
- Gorissen A, Kuyper TW (2000) Fungal species-specific responses of ectomycorrhizal Scots pine (*Pinus sylvestris*) to elevated CO<sub>2</sub>. *New Phytologist* 146:163-168
- Goverde M, Arnone III JA, Erhardt A (2002) Species-specific reactions to elevated CO<sub>2</sub> and nutrient availability in four grass species. *Basic and Applied Ecology* 3:221-227
- Graham EA, Nobel PS (1996) Long-term effects of a doubled atmospheric CO<sub>2</sub> concentration on the CAM species *Agave deserti*. *Journal of Experimental Botany* 47:61-69
- Griffin KL, Winner WE, Strain BR (1995) Growth and dry matter partitioning in loblolly and ponderosa pine seedlings in response to carbon and nitrogen availability. *New Phytologist* 129:547-556
- Griffin KLB, M.A., Thomas RB, Strain BR (1997) Interactive effects of soil nitrogen and atmospheric carbon dioxide on root/rhizosphere carbon dioxide efflux from loblolly and ponderosa pine seedlings. *Plant and Soil* 190:11-18
- Grunzweig JM, Körner C (2001) Growth, water and nitrogen relations in grassland model ecosystems of the semi-arid Negev of Israel exposed to elevated CO<sub>2</sub>. *Oecologia* 2001:251-262

- Grunzweig JM, Körner C (2003) Differential phosphorus and nitrogen effects drive species and community responses to elevated CO<sub>2</sub> in semi-arid grassland. *Functional Ecology* 17:766-777
- Guacher C, Costanzo N, Afif D, Mauffette Y, Chevrier N, Dizengremel P (2003) The impact of elevated ozone and carbon dioxide on young *Acer saccharum* seedlings. *Physiologia Plantarum* 117:392-402
- Guehl JM, Picon C, Assenac G, Gross P (1994) Interactive effects of elevated CO<sub>2</sub> and soil drought on growth and transpiration efficiency and its determinants in two European forest tree species. *Tree Physiology* 14:707-724
- Gunn S, Bailey SJ, Farrar JF (1999) Partitioning of dry mass and leaf area within plants of three species grown at elevated CO<sub>2</sub>. *Functional Ecology* 13:3-11
- Gupta G, Li Y (1994) Soybean response to carbon dioxide and molybdenum. *Communications in Soil Science and Plant Analysis* 25:2571-2581
- Hakala K, Mela T (1996) The effects of prolonged exposure to elevated temperatures and elevated CO<sub>2</sub> levels on the growth, yield and dry matter partitioning of field-sown meadow fescue. *Agricultural and Food Science in Finland* 5:285-298
- Hall JM, Paterson E, Killham K (1998) The effect of elevated CO<sub>2</sub> concentration and soil pH on the relationship between plant growth and rhizosphere denitrification potential. *Global Change Biology* 4:209-216
- Hao X, Hale BA, Ormrod DP, Papadopoulos AP (2000) Effects of pre-exposure to ultraviolet-B radiation on responses of tomato (*Lycopersicon esculentum* cv. New Yorker) to ozone in ambient and elevated carbon dioxide. *Environmental Pollution* 110:217-224
- Harmens H, Stirling CM, Marshall C, Farrar JF (2000) Is partitioning of dry weight and leaf area within *Dactylis glomerata* affected by N and CO<sub>2</sub> enrichment. *Annals of Botany* 86:833-839
- Hartwig UA et al. (2002) Arbuscular mycorrhiza infection enhances the growth response of *Lolium perenne* to elevated atmospheric pCO<sub>2</sub>. *Journal of Experimental Botany* 53:1207-1213
- Hartz-Rubin JS, DeLucia EH (2001) Canopy development of a model herbaceous community exposed to elevated atmospheric CO<sub>2</sub> and soil nutrients. *Physiologia Plantarum* 113:258-266
- Hattenschwiler S (2001) Tree seedling growth in natural deep shade: functional traits related to interspecific variation in response to elevated CO<sub>2</sub>. *Oecologia* 129:31-42
- Hattenschwiler S, Körner C (1998) Biomass allocation and canopy development in spruce model ecosystems under elevated CO<sub>2</sub> and increased N deposition. *Oecologia* 113:104-114
- Hattenschwiler S, Körner C (2003) Does elevated CO<sub>2</sub> facilitate naturalization of the non-indigenous *Prunus laurocerasus* in Swiss temperate forests? *Functional Ecology* 17:778-785
- He JS, Bazzaz FA (2003) Density-dependent responses of reproductive allocation to elevated atmospheric CO<sub>2</sub> in *Phytolacca americana*. *New Phytologist* 157:229-239
- He JS, Wolfe-Bellin K, Bazzaz FA (2005) Leaf-level physiology, biomass, and reproduction of *Phytolacca americana* under conditions of elevated CO<sub>2</sub> and altered temperature regimes. *International Journal of Plant Sciences* 166:615-622

- Heagle AS, Booker FL, Miller J, Pursley WA, Stefanski LA (1999a) Influence of daily carbon dioxide exposure duration and root environment on soybean response to elevated carbon dioxide. *Journal of Environmental Quality* 28:666-675
- Heagle AS, Miller J, Burkey KO, Eason G, Pursley WA (2002) Growth and yield response of snap bean to mixtures of carbon dioxide and ozone. *Journal of Environmental Quality* 31:2008-2014
- Heagle AS, Miller JE, Booker FL, Pursley WA (1999b) Ozone stress, carbon dioxide enrichment, and nitrogen fertility interactions in cotton. *Crop Science* 39:731-741
- Heagle AS, Miller JE, Pursley WA (2000) Growth and yield responses of winter wheat to mixtures of ozone and carbon dioxide. *Crop Science* 40:1656-1664
- Heagle AS, Miller JE, Pursley WA (2003) Growth and yield responses of potato to mixtures of carbon dioxide and ozone. *Journal of Environmental Quality* 32:1603-1610
- Heagle AS, Miller JE, Sherrill DE, Rawlings JO (1993) Effects of ozone and carbon-dioxide mixtures on 2 clones of white clover. *New Phytologist* 123:751-762
- Hebeisen T, Luscher A, Nosberger J (1997a) Effects of elevated atmospheric CO<sub>2</sub> and nitrogen fertilization on yield of *Trifolium repens* and *Lolium perenne*. *Acta Oecologica* 18:277-284
- Hebeisen T et al. (1997b) Growth response of *Trifolium repens* L. and *Lolium perenne* L. as monocultures and bi-species mixture to free air CO<sub>2</sub> enrichment and management. *Global Change Biology* 3:149-160
- Heijmans MMPD et al. (2001) Effects of elevated carbon dioxide and increased nitrogen deposition on bog vegetation in the Netherlands. *Journal of Ecology* 89:268-279
- Hendrix DL, Mauney JR, Kimball BA, Lewin K, Nagy J, Hendrey GR (1994) Influence of elevated CO<sub>2</sub> and mild water stress on nonstructural carbohydrates in field-grown cotton tissues. *Agricultural and Forest Meteorology* 70:153-162
- Henry HAL, Chiariello NR, Vitousek PM, Mooney HA, Field CB (2006) Interactive effects of fire, elevated carbon dioxide, nitrogen deposition, and precipitation on a California annual grassland. *Ecosystems* 9:1066-1075
- Hibberd JM, Whitbread R, Farrar JF (1996) Effect of 700  $\mu\text{mol mol}^{-1}$  CO<sub>2</sub> and infection with powdery mildew on the growth and carbon partitioning of barley. *New Phytologist* 134:309-315
- Hibbs DE, Chan SS, Castellano M, Niu CH (1995) Response of red alder seedlings to CO<sub>2</sub> enrichment and water stress. *New Phytologist* 129:569-577
- Higgins PAT, Jackson RB, Des Rosiers JM, Field CB (2002) Root production and demography in a California annual grassland under elevated atmospheric carbon dioxide. *Global Change Biology* 8:841-850
- Hocking PJ, Meyer CP (1991) Effects of CO<sub>2</sub> enrichment and nitrogen stress on growth, and partitioning of dry-matter and nitrogen in wheat and maize. *Australian Journal of Plant Physiology* 18:339-356
- Hodge A, Paterson E, Grayston SJ, Campbell CD, Ord BG, Killham K (1998) Characterisation and microbial utilisation of exudate material from the rhizosphere of *Lolium perenne* grown under CO<sub>2</sub> enrichment. *Soil Biology and Biochemistry* 30:1033-1043

- Hoffmann WA, Bazzaz FA, Chatterton NJ, Harrison PA, Jackson RB (2000) Elevated CO<sub>2</sub> enhances resprouting of a tropical savanna tree. *Oecologia* 123:312-317
- Hudak C, Bender J, Weigel HJ, Miller J (1999) Interactive effects of elevated CO<sub>2</sub>, O<sub>3</sub>, and soil water deficit on spring wheat (*Triticum aestivum* L. cv. Nandu). *Agronomie* 19:677-687
- Hughes L, Bazzaz FA (2001) Effects of elevated CO<sub>2</sub> on five plant-aphid interactions. *Entomologia Experimentalis et Applicata* 99:87-96
- Hunt HW, Elliot ET, Detling JK, Morgan J, Chen DX (1996) Responses of a C<sub>3</sub> and a C<sub>4</sub> perennial grass to elevated CO<sub>2</sub> and temperature under different water regimes. *Global Change Biology* 2:35-47
- Hunt R, Hand DW, Hannah MA, Neal AM (1995) Temporal and nutritional influences on the response to elevated CO<sub>2</sub> in selected British grasses. *Annals of Botany* 75:207-216
- Hussain M, Kubiske ME, Connor KF (2001) Germination of CO<sub>2</sub>-enriched *Pinus taeda* L. seeds and subsequent seedling growth responses to CO<sub>2</sub> enrichment. *Functional Ecology* 15:344-350
- Huxman TE, Hamerlynck EP, Jordan DN, Salsman KJ, Smith SD (1998) The effects of parental CO<sub>2</sub> environment on seed quality and subsequent seedling performance in *Bromus rubens*. *Oecologia* 114:202-208
- Huxman TE, Hamerlynck EP, Smith SD (1999) Reproductive allocation and seed production in *Bromus madritensis* ssp. *rubens* at elevated atmospheric CO<sub>2</sub>. *Functional Ecology* 13:769-777
- Ignatova LK, Novichkova NS, Mudrik VA, Lyubimov VY, Ivanov BN, Romanova AK (2005) Growth, photosynthesis, and metabolism of sugar beet at an early stage of exposure to elevated CO<sub>2</sub>. *Russian Journal of Plant Physiology* 52:184-190
- Ineichen K, Wiemken V, Wiemken A (1995) Shoots, roots and ectomycorrhiza formation of pine seedlings at elevated atmospheric carbon dioxide. *Plant, Cell and Environment* 18:703-707
- Israel DW, Rufty TW, Jr, Cure JD (1990) Nitrogen and phosphorus nutritional interactions in a CO<sub>2</sub> enriched environment. *Journal of Plant Nutrition* 13:1419-1433
- Jablonski LM (1997) Responses of vegetative and reproductive traits to elevated CO<sub>2</sub> and nitrogen in *Raphanus* varieties. *Canadian Journal of Botany* 75:533-545
- Jach ME, Laureysens I, Ceulemans R (2000) Above- and below-ground production of young Scots pine (*Pinus sylvestris* L.) trees after three years of growth in the field under elevated CO<sub>2</sub>. *Annals of Botany* 85:789-798
- Jasoni R et al. (2004) Altered leaf and root emissions from onion (*Allium cepa* L.) grown under elevated CO<sub>2</sub> conditions. *Environmental and Experimental Botany* 51:273-280
- Jifon JL, Wolfe D (2002) Photosynthetic acclimation to elevated CO<sub>2</sub> in *Phaseolus vulgaris* L. is altered by growth response to nitrogen supply. *Global Change Biology* 8:1018-1027
- Johns CV, Hughes L (2002) Interactive effects of elevated CO<sub>2</sub> and temperature on the leaf-miner *Dialectica scariella* Zeller (Lepidoptera: Gracillariidae) in Paterson's Curse, *Echium plantagineum* (Boraginaceae). *Global Change Biology* 8:142-152
- Johnson RH, Lincoln DE (1991) Sagebrush carbon allocation patterns and grasshopper nutrition: the influence of CO<sub>2</sub> enrichment and soil mineral limitation. *Oecologia* 87:127-134

- Johnson SL, Lincoln DE (2000) Allocation responses to CO<sub>2</sub> enrichment and defoliation by a native annual plant *Heterotheca subaxillaris*. *Global Change Biology* 6:767-778
- Jones P, Allen Jr. LH, Jones JW, Boote KJ, Campbell WJ (1984) Soybean canopy growth, photosynthesis, and transpiration responses to whole-season carbon dioxide enrichment. *Agronomy Journal* 76:633-637
- Jongen M, Fay P, Jones MB (1996) Effects of elevated carbon dioxide and arbuscular mycorrhizal infection on *Trifolium repens*. *New Phytologist* 132:413-423
- Kang SZ, Zhang FC, Hu XT, Zhang JH (2002) Benefits of CO<sub>2</sub> enrichment on crop plants are modified by soil water status. *Plant and Soil* 238:69-77
- Kaushal P, Guehl JM, Aussenac G (1989) Differential growth response to atmospheric carbon dioxide enrichment in seedlings of *Cedrus atlantica* and *Pinus nigra* ssp. *Laricio* var. *Corsicana*. *Canadian Journal of Forest Research* 19:1351-1359
- Kellomaki S, Wang KY (2001) Growth and resource use of birch seedlings under elevated carbon dioxide and temperature. *Annals of Botany* 87:669-682
- Kendall AC, Turner JC, Thomas SM (1985) Effects of CO<sub>2</sub> enrichment at different irradiances on growth and yield of wheat. 1. effects of cultivar and of duration of CO<sub>2</sub> enrichment. *Journal of Experimental Botany* 36:252-260
- Kettunen R, Saarnio S, Martikainen P, Silvola J (2005) Elevated CO<sub>2</sub> concentration and nitrogen fertilisation effects on N<sub>2</sub>O and CH<sub>4</sub> fluxes and biomass production of *Phleum pratense* on farmed peat soil. *Soil Biology and Biochemistry* 37:739-750
- Kim HY, Horie T, Nakagawa H, Wada K (1996) Effects of elevated CO<sub>2</sub> concentration and high temperature on growth and yield of rice I. The effect on development, dry matter production and some growth characteristics. *Japanese Journal of Crop Science* 65:634-643
- Kim HY, Lieffering M, Miura S, Kobayashi K, Okada M (2001) Growth and nitrogen uptake of CO<sub>2</sub>-enriched rice under field conditions. *New Phytologist* 150:223-229
- Kimball BA, Mauney JR (1993) Response of cotton to varying CO<sub>2</sub>, irrigation, and nitrogen: yield and growth. *Agronomy Journal* 85:706-712
- Kimball BA et al. (1995) Productivity and water use of wheat under free-air CO<sub>2</sub> enrichment. *Global Change Biology* 1:429-442
- King JS et al. (2005) Tropospheric O<sub>3</sub> compromises net primary production in young stands of trembling aspen, paper birch and sugar maple in response to elevated atmospheric CO<sub>2</sub>. *New Phytologist* 168:623-636
- King KM, Greer DH (1986) Effects of carbon dioxide and enrichment and soil water on maize. *Agronomy Journal* 78:515-521
- Kitao M, Koike T, Tobita H, Maruyama Y (2005) Elevated CO<sub>2</sub> and limited nitrogen nutrition can restrict excitation energy dissipation in photosystem II of Japanese white birch (*Betula platyphylla* var. *japonica*) leaves. *Physiologia Plantarum* 125:64-73
- Kleemola J, Peltonen J, Peltonen-Sainio P (1994) Apical development and growth of barley under different CO<sub>2</sub> and nitrogen regimes. *Journal of Agronomy and Crop Science* 173:79-92
- Klironomos JN, Rillig MC, Allen MF (1996) Below-ground microbial and microfaunal responses to *Artemisia tridentata* grown under elevated atmospheric CO<sub>2</sub>. *Functional Ecology* 10:527-534

- Klironomos JN, Ursic M, Rillig M, Allen MF (1998) Interspecific differences in the response of arbuscular mycorrhizal fungi to *Artemisia tridentata* grown under elevated atmospheric CO<sub>2</sub>. *New Phytologist* 138:599-605
- Knight SL, Mitchell CA (1988) Effects of CO<sub>2</sub> and photosynthetic photon flux on yield, gas exchange and growth rate of *Lactuca sativa* L. 'Waldmann's Green'. *Journal of Experimental Botany* 39:317-328
- Kohen AEL, Rouhier H, Mousseau M (1992) Changes in dry weight and nitrogen partitioning induced by elevated CO<sub>2</sub> depend on soil nutrient availability in sweet chestnut (*Castanea sativa* Mill). *Annales des Sciences Forestieres* 49:83-90
- Körner C, Diemer M, Schappi B, Niklaus P, Arnone III JA (1997) The responses of alpine grassland to four seasons of CO<sub>2</sub> enrichment: a synthesis. *Acta Oecologica* 18:165-175
- Kruse J, Hetzger I, Mai C, Polle A, Rennenberg H (2003) Elevated pCO<sub>2</sub> affects N-metabolism of young poplar plants (*Populus tremula* x *P. alba*) differently at deficient and sufficient N-supply. *New Phytologist* 157:65-81
- Kytoviita MM, Pelloux J, Fontaine V, Botton B, Dizengremel P (1999) Elevated CO<sub>2</sub> does not ameliorate effects of ozone on carbon allocation in *Pinus halepensis* and *Betula pendula* in symbiosis with *Paxillus involutus*. *Physiologia Plantarum* 106:370-377
- Kytoviita MM, Thiec DL, Dizengremel P (2001) Elevated CO<sub>2</sub> and ozone reduce nitrogen acquisition by *Pinus halepensis* from its mycorrhizal symbiont. *Physiologia Plantarum* 111:305-312
- Laing WA, Greer DH, Campbell BD (2002) Strong responses of growth and photosynthesis of five C-3 pasture species to elevated CO<sub>2</sub> at low temperatures. *Functional Plant Biology* 29:1089-1096
- Lake JC, Hughes L (1999) Nectar production and floral characteristics of *Tropaeolum majus* L. grown in ambient and elevated carbon dioxide. *Annals of Botany* 84:535-541
- Larigauderie A, Hilbert DW, Oechel WC (1988) Effect of CO<sub>2</sub> enrichment and nitrogen availability on resource acquisition and resource allocation in grass, *Bromus mollis*. *Oecologia* 77:544-549
- Larigauderie A, Reynolds JF, Strain BR (1994) Root response to CO<sub>2</sub> enrichment and nitrogen supply in loblolly *pine*. *Plant and Soil* 165:21-32
- Lawson T, Craigan J, Black CR, Colls JJ, Tulloch AM, Landon G (2001) Effects of elevated carbon dioxide and ozone on the growth and yield of potatoes (*Solanum tuberosum*) grown in open-top chambers. *Environmental Pollution* 111:479-491
- Leadley PW, Niklaus PA, Stocker R, Körner C (1999) A field study of the effects of elevated CO<sub>2</sub> on plant biomass and community structure in a calcareous grassland. *Oecologia* 118:39-49
- Leadley PW, Stocklin J (1996) Effects of elevated CO<sub>2</sub> on model calcareous grasslands: community, species, and genotype level responses. *Global Change Biology* 2:389-397
- LeCain DR, Morgan JA (1998) Growth, gas exchange, leaf nitrogen and carbohydrate concentrations in NAD-ME and NADP-ME C<sub>4</sub> grasses grown in elevated CO<sub>2</sub>. *Physiologia Plantarum* 102:297-306
- Lenssen GM, Lamers J, Stroetenga M, Rozema J (1993) Interactive effects of atmospheric CO<sub>2</sub> enrichment, salinity and flooding on growth of C<sub>3</sub> (*Elymus athericus*) and C<sub>4</sub> (*Spartina anglica*) salt marsh species. *Vegetatio* 104/105:379-388

- Lenssen GM, van Duin WE, Jak P, Rozema J (1995) The response of *Aster tripolium* and *Puccinellia maritima* to atmospheric carbon dioxide enrichment and their interactions with flooding and salinity. *Aquatic Botany* 50:181-192
- Lewis CE, Peratoner G, Cairns AJ, Causton DR, Foyer CH (1999) Acclimation of the summer annual species, *Lolium temulentum*, to elevated CO<sub>2</sub>. *Planta* 210:104-114
- Lewis JD, Strain BR (1996) The role of mycorrhizas in the response of *Pinus taeda* seedlings to elevated CO<sub>2</sub>. *New Phytologist* 133:431-443
- Lewis JD, Thomas RB, Strain BR (1994) Effect of elevated CO<sub>2</sub> on mycorrhizal of loblolly pine (*Pinus taeda* L.) seedlings. *Plant and Soil* 165:81-88
- Lewis JD, Wang XZ, Griffin KL, Tissue DT (2003) Age at flowering differentially affects vegetative and reproductive responses of a determinate annual plant to elevated carbon dioxide. *Oecologia* 135:194-201
- Li F, Kang S, Zhang J (2003) CO<sub>2</sub> enrichment on biomass accumulation and nitrogen nutrition of spring wheat under different soil nitrogen and water status. *Journal of Plant Nutrition* 26:769-788
- Li YC, Gupta G (1993) Photosynthetic changes in soybean with and without nitrogen and increased carbon-dioxide. *Plant Science* 89:1-4
- Li Z, Yagi K, Sakai H, Kobayashi K (2004) Influence of elevated CO<sub>2</sub> and nitrogen nutrition on rice plant growth, soil microbial biomass, dissolved organic carbon and dissolved CH<sub>4</sub>. *Plant and Soil* 258:81-90
- Lilley JM, Bolger TB, Gifford RM (2001) Productivity of *Trifolium subterraneum* and *Phalaris aquatica* under warm high CO<sub>2</sub> conditions. *New Phytologist* 150:371-383
- Lin WH, Wang DL (1998) Effects of elevated CO<sub>2</sub> on growth and carbon partitioning in rice. *Chinese Science Bulletin* 43:1982-1986
- Lippert M, Haberle KH, Steiner K, Payer HD, Rehfuss KE (1996) Interactive effects of elevated CO<sub>2</sub> and O<sub>3</sub> on photosynthesis and biomass production of clonal 5-year-old Norway spruce (*Picea abies* L. Karst.) under different nitrogen nutrition and irrigation treatments. *Trees-Structure and Function* 10:382-392
- Liu WP, Kozovits AR, Grams TEE, Blaschke H, Rennenberg H, Matyssek R (2004) Competition modifies effects of enhanced ozone/carbon dioxide concentrations on carbohydrate and biomass accumulation in juvenile Norway spruce and European beech. *Tree Physiology* 24:1045-1055
- Loats KV, Rebbeck J (1999) Interactive effects of ozone and elevated carbon dioxide on the growth and physiology of black cherry, green ash, and yellow-poplar seedlings. *Environmental Pollution* 106:237-248
- Loewe A, Einig W, Shi L, Dizengremel P, Hampp R (2000) Mycorrhiza formation and elevated CO<sub>2</sub> both increase the capacity for sucrose synthesis in source leaves of spruce and aspen. *New Phytologist* 145:565-574
- Lovelock CE, Kyllö D, Winter K (1996) Growth responses to vesicular-arbuscular mycorrhizae and elevated CO<sub>2</sub> in seedlings of a tropical tree, *Beilschmiedia pendula*. *Functional Ecology* 10:662-667
- Lovelock CE, Posada J, Winter K (1999) Effects of elevated CO<sub>2</sub> and defoliation on compensatory growth and photosynthesis of seedlings in a tropical tree, *Copaifera aromatica*. *Biotropica* 31:279-287
- Lovelock CE, Winter K, Mersits R, Popp M (1998) Responses of communities of tropical tree species to elevated CO<sub>2</sub> in a forest clearing. *Oecologia* 116:207-218

- Lucash MS, Farnsworth B, Winner WE (2005) Response of sagebrush steppe species to elevated CO<sub>2</sub> and soil temperature. *Western North American Naturalist* 65:80-86
- MacDowall FDH (1983) Effects of light-intensity and CO<sub>2</sub> concentration on the kinetics of 1st-month growth and nitrogen-fixation of alfalfa. *Canadian Journal of Botany* 61:731-740
- Maestre FT, Bradford MA, Reynolds JF (2005) Soil nutrient heterogeneity interacts with elevated CO<sub>2</sub> and nutrient availability to determine species and assemblage responses in a model grassland community. *New Phytologist* 168:637-650
- Maestre FT, Reynolds JF (2006) Spatial heterogeneity in soil nutrient supply modulates nutrient and biomass responses to multiple global change drivers in model grassland communities. *Global Change Biology* 12:2431-2441
- Maherali H, DeLucia EH (2000) Interactive effects of elevated CO<sub>2</sub> and temperature on water transport in Ponderosa pine. *American Journal of Botany* 87:243-249
- Maillard P, Guehl JM, Muller JF, Gross P (2001) Interactive effects of elevated CO<sub>2</sub> concentration and nitrogen supply on partitioning of newly fixed <sup>13</sup>C and <sup>15</sup>N between shoot and roots of pedunculate oak seedlings (*Quercus robur*). *Tree Physiology* 21:163-172
- Makino A, Harada M, Sato T, Nakano H, Mae T (1997) Growth and N allocation in rice plants under CO<sub>2</sub> enrichment. *Plant Physiology* 115:199-203
- Malmstrom CM, Field CB (1997) Virus-induced differences in the response of oat plants to elevated carbon dioxide. *Plant, Cell and Environment* 20:178-188
- Markkola AM, Ohtonen A, Ahonen-Jonnarh U, Ohtonen R (1996) Scots pine responses to CO<sub>2</sub> enrichment. 1. Ectomycorrhizal fungi and soil fauna. *Environmental Pollution* 94:309-316
- Marks S, Clay K (1990) Effects of O<sub>2</sub> enrichment, nutrient addition, and fungal endophyte-infection on the growth of two grasses. *Oecologia* 84:207-214
- Maroco JP, Breia E, Faria T, Pereira JS, Chaves MM (2002) Effects of long-term exposure to elevated CO<sub>2</sub> and N fertilization on the development of photosynthetic capacity and biomass accumulation in *Quercus suber* L. *Plant, Cell and Environment* 25:105-113
- Martin-Olmedo P, Rees RM, Grace J (2002) The influence of plants grown under elevated CO<sub>2</sub> and N fertilization on soil nitrogen dynamics. *Global Change Biology* 8:643-657
- Masle J, Farquhar GD, Gifford RM (1990) Growth and carbon economy of wheat seedlings as affected by soil resistance to penetration and ambient partial pressure of CO<sub>2</sub>. *Australian Journal of Plant Physiology* 17:465-487
- Masle J, Hudson GS, Badger MR (1993) Effects of ambient CO<sub>2</sub> concentration on growth and nitrogen use in tobacco (*Nicotiana tabacum*) plants transformed with an antisense gene to the small-subunit of ribulose-1,5-biphosphate carboxylase oxygenase. *Plant Physiology* 103:1075-1088
- Matt P, Geiger M, Walch-Liu P, Engels C, Krapp A, Stitt M (2001) Elevated carbon dioxide increases nitrate uptake and nitrate reductase activity when tobacco is growing on nitrate, but increases ammonium uptake and inhibits nitrate reductase activity when tobacco is growing on ammonium nitrate. *Plant, Cell and Environment* 24:1119-1137

- McKee IF, Bullimore JF, Long SP (1997) Will elevated CO<sub>2</sub> concentrations protect the yield of wheat from O<sub>3</sub> damage? *Plant, Cell and Environment* 20:77-84
- McKee IF, Woodward FI (1994) CO<sub>2</sub> enrichment responses of wheat-interactions with temperature, nitrate and phosphate. *New Phytologist* 127:447-453
- McMaster GS, LeCain DR, Morgan JA, Aiguo L, Hendrix DL (1999) Elevated CO<sub>2</sub> increases wheat CER, leaf and tiller development, and shoot and root growth. *Journal of Agronomy and Crop Science* 183:119-128
- Megonigal JP, Schlesinger WH (1997) Enhanced CH<sub>4</sub> emissions from a wetland soil exposed to elevated CO<sub>2</sub>. *Biogeochemistry* 37:77-88
- Megonigal JP, Vann CD, Wolf AA (2005) Flooding constraints on tree (*Taxodium distichum*) and herb growth responses to elevated CO<sub>2</sub>. *Wetlands* 25:430-438
- Miao SL (1995) Acorn mass and seedling growth in *Quercus rubra* in response to elevated CO<sub>2</sub>. *Journal of Vegetation Science* 6:697-700
- Miao SL, Wayne PM, Bazzaz FA (1992) Elevated CO<sub>2</sub> differentially alters the responses of cooccurring birch and maple seedlings to a moisture gradient. *Oecologia* 90:300-304
- Miller JE, Heagle AS, Pursley WA (1998) Influence of ozone stress on soybean response to carbon dioxide enrichment: II. Biomass and development. *Crop Science* 38:122-128
- Mishra RS, Abdin MZ, Uprety DC (1999) Interactive effects of elevated CO<sub>2</sub> and moisture stress on the photosynthesis, water relation and growth of *Brassica* species. *Journal of Agronomy and Crop Science* 182:223-229
- Mitchell RAC, Mitchell VJ, Driscoll SP, Franklin J, Lawlor DW (1993) Effects of increased CO<sub>2</sub> concentration and temperature on growth and yield of winter wheat at two levels of nitrogen application. *Plant, Cell and Environment* 16:521-529
- Mo G et al. (1992) Root and shoot weight in a tallgrass prairie under elevated carbon dioxide. *Environmental and Experimental Botany* 32:193-201
- Morgan JA, Knight WG, Dudley LM, Hunt HW (1994) Enhanced root system C-sink activity, water relations and aspects of nutrient acquisition in mycotrophic *Bouteloua gracilis* subjected to CO<sub>2</sub> enrichment. *Plant and Soil* 165:139-146
- Mortensen LM (1990) Effects of ozone on growth of *Triticum aestivum* L. at different light, air humidity and CO<sub>2</sub> levels. *Norwegian Journal of Agricultural Sciences* 4:343-348
- Mortensen LM (1994a) Effects of carbon dioxide concentration on assimilate partitioning, photosynthesis and transpiration of *Betula pendula* Roth. and *Picea abies* karst. seedlings at two temperatures. *Acta Agriculturae Scandinavica Section B-Soil and Plant Sciences* 44:164-169
- Mortensen LM (1994b) Effects of elevated CO<sub>2</sub> concentrations on the growth and yield of eight vegetable species in a cool climate. *Scientia Horticulturae* 58:177-185
- Mortensen LM (1994c) The influence of carbon dioxide or ozone concentration on growth and assimilate partitioning in seedlings of nine conifers. *Acta Agriculturae Scandinavica Section B-Soil and Plant Sciences* 44:157-163
- Mortensen LM (1995) Effect of carbon dioxide concentration on biomass production and partitioning in (*Betula pubescens* Ehrh.) seedlings at different ozone and temperature regimes. *Environmental Pollution* 87:337-343

- Mortensen LM (1998) Effects of elevated CO<sub>2</sub> concentration on growth of *Betula pubescens* Ehrh. in different climatic conditions. Scandinavian Journal of Forest Research 13:197-203
- Mousseau M (1993) Effects of elevated CO<sub>2</sub> on growth, photosynthesis and respiration of sweet chestnut (*Castanea sativa* Mill.). Vegetatio 104/105:413-419
- Mousseau M, Enoch HZ (1989) Effect of doubling atmospheric CO<sub>2</sub> concentration on growth, dry matter distribution and CO<sub>2</sub> exchange of 2-yr old sweet chestnut trees (*Castanea sativa* Mill.). Annales des Sciences Forestieres 46 suppl:506-508
- Moya TB, Ziska LH, Namuco OS, Olszyk D (1998) Growth dynamics and genotypic variation in tropical, field-grown paddy rice (*Oryza sativa* L.) in response to increasing carbon dioxide and temperature. Global Change Biology 4:645-656
- Murray MB, Leith ID, Jarvis PG (1996) The effect of long term CO<sub>2</sub> enrichment on the growth, biomass partitioning and mineral nutrition of sitka spruce (*Picea sitchensis* (Bong.) Carr.). Trees-Structure and Function 10:393-402
- Murray MB, Smith RI, Friend A, Jarvis PG (2000) Effect of elevated CO<sub>2</sub> and varying nutrient application rates on physiology and biomass accumulation of Sitka spruce (*Picea sitchensis*). Tree Physiology 20:421-434
- Musgrave ME, Strain BR (1988) Response of 2 wheat cultivars to CO<sub>2</sub> enrichment under subambient oxygen conditions. Plant Physiology 87:346-350
- Musgrave ME, Strain BR, Siedow JN (1986) Response of two pea hybrids to CO<sub>2</sub> enrichment: a test of the energy overflow hypothesis for alternative respiration. Proceedings of the National Academy of Sciences of the United States of America 83:8157-8161
- Nakamoto H et al. (2004) Effects of carbon dioxide enrichment during different growth periods on flowering, pod set and seed yield in soybean. Plant Production Science 7:11-15
- Navas ML, Guillerm JL, Fabreguettes J, Roy J (1995) The influence of elevated CO<sub>2</sub> on community structure, biomass and carbon balance of Mediterranean old-field microcosms. Global Change Biology 1:325-335
- Newbery RM, Wolfenden J (1996) Effects of elevated CO<sub>2</sub> and nutrient supply on the seasonal growth and morphology of *Agrostis capillaris*. New Phytologist 132:403-411
- Newton PCD, Clark H, Bell CC, Glasgow EM, Campbell BD (1994) Effects of elevated CO<sub>2</sub> and simulated seasonal changes in temperature on the species composition and growth rates of pasture turves. Annals of Botany 73:53-59
- Nguyen NT, Mohapatra PK, Fujita K (2006) Elevated CO<sub>2</sub> alleviates the effects of low P on the growth of N<sub>2</sub>-fixing *Acacia auriculiformis* and *Acacia mangium*. Plant Soil 285:369-379
- Nicolas ME, Munns R, Samarakoon AB, Gifford RM (1993) Elevated CO<sub>2</sub> improved the growth of wheat under salinity. Australian Journal of Plant Physiology 20:349-360
- Nijs I, Impens I (1997) An analysis of the balance between root and shoot activity in *Lolium perenne* cv. Melvina. Effects of CO<sub>2</sub> concentration and air temperature. New Phytologist 135:81-91
- Niklaus PA, Wohlfender M, Siegwolf R, Körner C (2001) Effects of six years atmospheric enrichment on plant, soil, and soil microbial C of a calcareous grassland. Plant and Soil 233:189-202

- Nobel PS, Cui MY, Miller PM, Luo YQ (1994) Influences of soil volume and an elevated CO<sub>2</sub> level on growth and CO<sub>2</sub> exchange for the crassulacean acid metabolism plant *Opuntia ficus-indica*. *Physiologia Plantarum* 90:173-180
- Nobel PS, de Cortazar VG (1991) Growth and predicted productivity of *Opuntia ficus-indica* for current and elevated carbon dioxide. *Agronomy Journal* 83:224-230
- Nobel PS, Hartsock TL (1986) Short-term and long-term responses of crassulacean acid metabolism plants to elevated CO<sub>2</sub>. *Plant Physiology* 82:604-606
- Noble R, Jensen KF, Ruff BS, Loats K (1992) Response of *Acer saccharum* seedlings to elevated carbon dioxide and ozone. *Ohio Journal of Science* 92:60-62
- Norby NJ (1987) Nodulation and nitrogenase activity in nitrogen-fixing woody plants stimulated by CO<sub>2</sub> enrichment of the atmosphere. *Physiologia Plantarum* 71:77-82
- Norby RJ, Gunderson CA, Wullschleger SD, O'Neill EG, McCracken MK (1992) Productivity and compensatory responses of yellow-poplar trees in elevated CO<sub>2</sub>. *Nature* 357:322-324
- Norby RJ, O'Neil EG (1989) Growth dynamics and water use of seedlings of *Quercus alba* L. in CO<sub>2</sub>-enriched atmospheres. *New Phytologist* 111:491-500
- Norby RJ, O'Neil EG (1991) Leaf area compensation and nutrient interactions in CO<sub>2</sub>-enriched seedlings of yellow-poplar (*Liriodendron tulipifera* L.). *New Phytologist* 117:515-528
- Norby RJ, O'Neill EG, Hood WG, Luxmoore RJ (1987) Carbon allocation, root exudation and mycorrhizal colonization of *Pinus echinata* seedlings grown under CO<sub>2</sub> enrichment. *Tree Physiology* 3:203-210
- Norby RJ, O'Neill EG, Luxmoore RJ (1986) Effects of atmospheric CO<sub>2</sub> enrichment on the growth and mineral nutrition of *Quercus alba* seedlings in nutrient-poor soil. *Plant Physiology* 82:83-89
- Norby RJ, Wullschleger SD, Gunderson c, Nietch CT (1995) Increased growth efficiency of *Quercus alba* trees in a CO<sub>2</sub>-enriched atmosphere. *New Phytologist* 131:91-97
- O'Neill EG, Luxmoore RJ, Norby RJ (1987a) Elevated atmospheric CO<sub>2</sub> effects on seedling growth, nutrient uptake, and rhizosphere bacterial populations of *Liriodendron tulipifera* L. *Plant and Soil* 104:3-11
- O'Neill EG, Luxmoore RJ, Norby RJ (1987b) Increases in mycorrhizal colonization and seedling growth in *Pinus echinata* and *Quercus alba* in an enriched CO<sub>2</sub> atmosphere. *Canadian Journal of Forest Research* 17:878-883
- Oberbauer SF, Strain B, Fetcher N (1985) Effect of CO<sub>2</sub>-enrichment on seedling physiology and growth of two tropical tree species. *Physiologia Plantarum* 65:352-356
- Obrist D, Arnone III JA (2003) Increasing CO<sub>2</sub> accelerates root growth and enhances water acquisition during early stages of development in *Larrea tridentata*. *New Phytologist* 159:175-184
- Oechel WC et al. (1984) Response of vegetation to carbon dioxide. U.S. Department of Energy Carbon Dioxide Research Division, Office of Energy Research, Washington

- Olesniewicz KS, Thomas RB (1999) Effects of mycorrhizal colonization on biomass production and nitrogen fixation of black locust (*Robinia pseudoacacia*) seedlings grown under elevated atmospheric carbon dioxide. *New Phytologist* 142:133-140
- Olszyk DM et al. (2003) Whole-seedling biomass allocation, leaf area, and tissue chemistry for Douglas-fir exposed to elevated CO<sub>2</sub> and temperature for 4 years. *Canadian Journal of Forest Research* 33:269-278
- Olszyk DM, Wise C (1997) Interactive effects of elevated CO<sub>2</sub> and O<sub>3</sub> on rice and flacca tomato. *Agriculture, Ecosystems and Environment* 66:1-10
- Overdieck D (1993) Effects of atmospheric CO<sub>2</sub> enrichment of CO<sub>2</sub> exchange rates of beech stands in small model ecosystems. *Water, Air, and Soil Pollution* 70:259-277
- Overdieck D, Reid C, Strain BR (1988) The effects of preindustrial and future CO<sub>2</sub> concentrations on growth, dry matter production and the C/N relationship in plants at low nutrient supply: *Vigna unguiculata* (cowpea), *Abelmoschus esculentus* (okra), and *Raphanus sativus* (radish). *Angewandte Botanik* 62:119-134
- Overdieck D, Reining F (1986) Effect of atmospheric CO<sub>2</sub> enrichment on perennial ryegrass (*Lolium perenne* L.) and white clover (*Trifolium repens* L.) competing in managed model-ecosystems. *Acta Oecologica* 7:357-366
- Owensby CE, Coyne PI, Ham JM, Auen LM, Knapp AK (1993) Biomass production in a tallgrass prairie ecosystem exposed to ambient and elevated CO<sub>2</sub>. *Ecological Applications* 3:644-653
- Owensby CE, Ham JM, Knapp AK, Auen LM (1999) Biomass production and species composition change in a tallgrass prairie ecosystem after long-term exposure to elevated atmospheric CO<sub>2</sub>. *Global Change Biology* 5:497-506
- Paez A, Hellmers H, Strain BR (1983) CO<sub>2</sub> enrichment, drought stress and growth of Alaska pea-plants (*Pisum sativum*). *Physiologia Plantarum* 58:161-165
- Paez A, Hellmers H, Strain BR (1984) Carbon dioxide enrichment and water stress interaction on growth of two tomato cultivars. *Journal of Agricultural Science* 102:687-693
- Pal M et al. (2005) Effects of elevated CO<sub>2</sub> and nitrogen on wheat growth and photosynthesis. *Biologia Plantarum* 49:467-470
- Pardos M, Puertolas J, Aranda I, Pardos JA (2006) Can CO<sub>2</sub> enrichment modify the effect of water and high light stress on biomass allocation and relative growth rate of cork oak seedlings? *Trees* 20:713-724
- Parsons WFJ, Kopper BJ, Lindroth RL (2003) Altered growth and fine root chemistry of *Betula papyrifera* and *Acer saccharum* under elevated CO<sub>2</sub>. *Canadian Journal of Forest Research* 33:842-846
- Paterson E, Hodge A, Thornton B, Millard P, Killham K (1999) Carbon partitioning and rhizosphere C-flow in *Lolium perenne* as affected by CO<sub>2</sub> concentration, irradiance and below-ground conditions. *Global Change Biology* 5:669-678
- Paterson E, Rattray EAS, Killham K (1996) Effect of elevated atmospheric CO<sub>2</sub> concentration on C-partitioning and rhizosphere C-flow for three plant species. *Soil Biology and Biochemistry* 28:195-201
- Patterson DT (1986) Responses of Soybean (*Glycine max*) and three C<sub>4</sub> grass weeds to CO<sub>2</sub> enrichment during drought. *Weed Science* 34:203-210

- Patterson DT, Flint EP (1980) Potential effects of global atmospheric CO<sub>2</sub> enrichment on the growth and competitiveness of C<sub>3</sub> and C<sub>4</sub> weed and crop plants. *Weed Science* 28:71-75
- Patterson DT, Flint EP (1982) Interacting effects of CO<sub>2</sub> and nutrient concentration. *Weed Science* 30:389-394
- Patterson DT, Highsmith MT, Flint EP (1988) Effects of temperature and CO<sub>2</sub> concentration on the growth of cotton (*Gossypium hirsutum*), spurred anoda (*Anoda cristata*), and velvetleaf (*Abutilon theophrasti*). *Weed Science* 36:751-757
- Pearson M, Brooks GL (1995) The influence of elevated CO<sub>2</sub> on growth and age-related-changes in leaf gas-exchange. *Journal of Experimental Botany* 46:1651-1659
- Pearson M, Brooks GL (1996) The effects of elevated CO<sub>2</sub> and grazing by *Gastrophysa viridula* on the physiology and regrowth of *Rumex obtusifolius*. *New Phytologist* 133:605-616
- Pendall E, Mosier AR, Morgan JA (2004) Rhizodeposition stimulated by elevated CO<sub>2</sub> in a semiarid grassland. *New Phytologist* 162:447-458
- Penuelas J, Biel C, Estiarte M (1995) Growth, biomass allocation, and phenology responses of pepper to elevated CO<sub>2</sub> concentrations and different water and nitrogen supply. *Photosynthetica* 31:91-99
- Pettersson R, McDonald AJS (1992) Effects of elevated carbon dioxide concentration on photosynthesis and growth of small birch plants (*Betula pendula* Roth.) at optimal nutrition. *Plant, Cell and Environment* 15:911-919
- Picon C, Ferhi A, Guehl JM (1997) Concentration and delta <sup>13</sup>C of leaf carbohydrates in relation to gas exchange in *Quercus robur* under elevated CO<sub>2</sub> and drought. *Journal of Experimental Botany* 48:1547-1556
- Picon C, Guehl JM, Aussenac G (1996) Growth dynamics, transpiration and water-use efficiency in *Quercus robur* plants submitted to elevated CO<sub>2</sub> and drought. *Annals of Forest Science* 53:431-446
- Polley HW, Johnson HB, Mayeux HS (1997) Leaf physiology, production, water use, and nitrogen dynamics of the grassland invader *Acacia smallii* at elevated CO<sub>2</sub> concentration. *Tree Physiology* 17:89-96
- Polley HW, Johnson HB, Mayeux HS, Tischler CR, Brown DA (1996) Carbon dioxide enrichment improves growth, water relations and survival of droughted honey mesquite (*Prosopis glandulosa*) seedlings. *Tree Physiology* 16:817-823
- Polley HW, Johnson HB, Tischler CR, Torbert HA (1999a) Links between transpiration and plant nitrogen: Variation with atmospheric CO<sub>2</sub> concentration and nitrogen availability. *International Journal of Plant Sciences* 160:535-542
- Polley HW, Tischler CR, Johnson HB, Pennington RE (1999b) Growth, water relations, and survival of drought-exposed seedlings from six maternal families of honey mesquite (*Prosopis glandulosa*): responses to CO<sub>2</sub> enrichment. *Tree Physiology* 19:359-366
- Pregitzer KS, Zak DR, Curtis PS, Kubiske ME, Teeri JA, Vogel CS (1995) Atmospheric CO<sub>2</sub>, soil nitrogen and turnover of fine roots. *New Phytologist* 129:579-585
- Prior SA, Rogers HH, Runion GB, Mauney JR (1994) Effects of free-air CO<sub>2</sub> enrichment on cotton root growth. *Agricultural and Forest Meteorology* 70:69-86
- Prior SA, Runion GB, Mitchell RJ, Rogers HH, Amthor JS (1997) Effects of atmospheric CO<sub>2</sub> on longleaf pine: productivity and allocation as influenced by nitrogen and water. *Tree Physiology* 17:397-405

- Prior SA, Torbert HA, Runion GB, Mullins GL, Rogers HH, Mauney JR (1998) Effects of carbon dioxide enrichment on cotton nutrient dynamics. *Journal of Plant Nutrition* 21:1407-1426
- Qaderi MM, Kurepin LV, Reid DM (2006) Growth and physiological responses of canola (*Brassica napus*) to three components of global climate change: temperature, carbon dioxide and drought. *Physiologia Plantarum* 128:710-721
- Radoglou KM, Jarvis PG (1992) The effects of CO<sub>2</sub> enrichment and nutrient supply on growth-morphology and anatomy of *Phaseolus vulgaris* L. seedlings. *Annals of Botany* 70:245-256
- Radoglou KM, Jarvis PG (1993) Effects of atmospheric CO<sub>2</sub> enrichment on early growth of *Vicia faba*, a plant with large cotyledons. *Plant, Cell and Environment* 16:93-98
- Read JJ, Morgan JA (1996) Growth and partitioning in *Pascopyrum smithii* (C<sub>3</sub>) and *Bouteloua gracilis* (C<sub>4</sub>) as influenced by carbon dioxide and temperature. *Annals of Botany* 77:487-496
- Reddy KR, Koti S, Davidonis GH, Reddy VR (2004) Interactive effects of carbon dioxide and nitrogen nutrition on cotton growth, development, yield, and fiber quality. *Agronomy Journal* 96:1148-1157
- Reddy KR, Robana RR, Hodges HF, Liu XJ, McKinion JM (1998) Interactions of CO<sub>2</sub> enrichment and temperature on cotton growth and leaf characteristics. *Environmental and Experimental Botany* 39:117-129
- Reddy VR, Reddy KR, Hodges HF (1995) Carbon dioxide enrichment and temperature effects on cotton canopy photosynthesis, transpiration, and water-use efficiency. *Field Crops Research* 41:13-23
- Reddy VR, Reddy KR, Wang Z (1997) Cotton responses to nitrogen, carbon dioxide and temperature interactions. *Soil Science and Plant Nutrition* 43:1125-1130
- Reekie EG, Bazzaz FA (1989) Competition and patterns of resource use among seedlings of five tropical trees grown at ambient and elevated CO<sub>2</sub>. *Oecologia* 79:212-222
- Reich PB et al. (2001) Do species and functional groups differ in acquisition and use of C, N and water under varying atmospheric CO<sub>2</sub> and N availability regimes? A field test with 16 grassland species. *New Phytologist* 150:435-448
- Reining F (1995) The effect of elevated CO<sub>2</sub> concentrations on the competition between *Lamium galeobdolon* and *Stellaria holostea*. *Photosynthetica* 31:501-508
- Retuerto R, Woodward FI (1993) The influence of increased CO<sub>2</sub> and water supply on growth, biomass allocation, and water use efficiency of *Sinapis alba* L. grown under different wind speeds. *Oecologia* 94:415-427
- Rey A, Jarvis PG (1997) Growth responses of young birch trees (*Betula pendula* Roth.) after four and a half year of CO<sub>2</sub> exposure. *Annals of Botany* 80:809-816
- Riikonen J et al. (2004) Silver birch and climate change: variable growth and carbon allocation responses to elevated concentrations of carbon dioxide and ozone. *Tree Physiology* 24:1227-1237
- Rillig MC, Scow KM, Klironomos JN, Allen MF (1997) Microbial carbon-substrate utilization in the rhizosphere of *Gutierrezia sarothrae* grown in elevated atmospheric carbon dioxide. *Soil Biology and Biochemistry* 29:1387-1394

- Rocheffort L, Bazzaz FA (1992) Growth response to elevated CO<sub>2</sub> in seedlings of four co-occurring birch species. *Canadian Journal of Forest Research* 22:1583-1587
- Roden JS, Ball MC (1996a) The effect of elevated CO<sub>2</sub> on growth and photosynthesis of two eucalyptus species exposed to high temperatures and water deficits. *Plant Physiology* 111:909-919
- Roden JS, Ball MC (1996b) Growth and photosynthesis of two eucalypt species during high temperature stress under ambient and elevated CO<sub>2</sub>. *Global Change Biology* 2:115-128
- Roden JS, Egerton JJG, Ball MC (1999) Effect of elevated CO<sub>2</sub> on photosynthesis and growth of snow gum (*Eucalyptus pauciflora*) seedlings during winter and spring. *Australian Journal of Plant Physiology* 26:37-46
- Roden JS, Wiggins DJ, Ball MC (1997) Photosynthesis and growth of two rain forest species in simulated gaps under elevated CO<sub>2</sub>. *Ecology* 78:385-393
- Rogers HH, Peterson CM, McCrimmon JN, Cure JD (1992) Response of plant roots to elevated atmospheric carbon dioxide. *Plant, Cell and Environment* 15:749-752
- Romanova AK, Mudrik VA, Novichkova NS, Demidova RN, Polyakova VA (2002) Physiological and biochemical characteristics of sugar beet plants grown at an increased carbon dioxide concentration and at various nitrate doses. *Russian Journal of Plant Physiology* 49:204-210
- Ronn R, Ekelund F, Christensen S (2003) Effects of elevated atmospheric CO<sub>2</sub> on protozoan abundance in soil planted wheat and on decomposition of wheat roots. *Plant and Soil* 251:13-21
- Rouhier H, Read DJ (1998a) Plant and fungal responses to elevated atmospheric carbon dioxide in mycorrhizal seedlings of *Pinus sylvestris*. *Environmental and Experimental Botany* 40:237-246
- Rouhier H, Read DJ (1998b) The role of mycorrhiza in determining the response of *Plantago lanceolata* to CO<sub>2</sub> enrichment. *New Phytologist* 139:367-373
- Rouhier H, Read DJ (1999) Plant and fungal responses to elevated atmospheric CO<sub>2</sub> in mycorrhizal seedlings of *Betula pendula*. *Environmental and Experimental Botany* 42:231-241
- Roumet C, Garnier E, Suzor H, Salager JL, Roy J (2000) Short and long-term responses of whole-plant gas exchange to elevated CO<sub>2</sub> in four herbaceous species. *Environmental and Experimental Botany* 43:155-169
- Rufty TW, Raper Jr CD, Jackson WA (1981) Nitrogen assimilation, root growth and whole plant responses of soybean to root temperature, and to carbon dioxide and light in the aerial environment. *New Phytologist* 88:607-619
- Runion GB et al. (2006) Effects of Elevated Atmospheric Carbon Dioxide on Biomass and Carbon Accumulation in a Model Regenerating Longleaf Pine Community. *Journal of Environmental Quality* 35:1478-1486
- Runion GB, Entry JA, Prior SA, Mitchell RJ, Rogers HH (1999) Tissue chemistry and carbon allocation in seedlings of *Pinus palustris* subjected to elevated atmospheric CO<sub>2</sub> and water stress. *Tree Physiology* 19:329-335
- Ryle GJA, Powell CE, Davidson IA (1992a) Growth of white clover, dependent on N<sub>2</sub> fixation, in elevated CO<sub>2</sub> and temperature. *Annals of Botany* 70:221-228

- Ryle GJA, Powell CE, Tewson V (1992b) Effect of elevated CO<sub>2</sub> on photosynthesis, respiration and growth of perennial ryegrass. *Journal of Experimental Botany* 43:811-818
- Sa T (1997) Effect of phosphorus stress on photosynthesis and nitrogen fixation of soybean plant under CO<sub>2</sub> enrichment. *Agricultural Chemistry and Biotechnology* 40:134-138
- Saebo A, Mortensen LM (1996) Growth, morphology and yield of wheat, barley and oats grown at elevated atmospheric CO<sub>2</sub> concentration in a cool, maritime climate. *Agriculture, Ecosystems and Environment* 57:9-15
- Salsman KJ, Jordan DN, Smith SD, Neuman DS (1999) Effect of atmospheric CO<sub>2</sub> enrichment on root growth and carbohydrate allocation of *Phyaseolus* SPP. *International Journal of Plant Sciences* 160:1075-1081
- Samarakoon AB, Gifford RM (1996) Water use and growth of cotton in response to elevated CO<sub>2</sub> in wet and drying soil. *Australian Journal of Plant Physiology* 23:63-74
- Samuelson LJ, Seiler JR (1992) Fraser fir seedling gas exchange and growth in response to elevated CO<sub>2</sub>. *Environmental and Experimental Botany* 32:351-356
- Samuelson LJ, Seiler JR (1993a) Interactive role of elevated CO<sub>2</sub>, nutrient limitations, and water-stress in the growth-responses of red spruce seedlings. *Forest Science* 39:348-358
- Samuelson LJ, Seiler JR (1993b) Red spruce seedling gas exchange in response to elevated CO<sub>2</sub>, water stress, and soil fertility treatments. *Canadian Journal of Forest Research* 24:954-959
- Sanders IR, Streitwolf-Engel R, Van Der Heijden MGA, Boller T, Wiemken A (1998) Increased allocation to external hyphae of arbuscular mycorrhizal fungi under CO<sub>2</sub> enrichment. *Oecologia* 117:496-503
- Santrucek J, Santruckova H, Kveton J, Simkova M, Rohacek K (1994) The effect of elevated CO<sub>2</sub> concentration on photosynthetic CO<sub>2</sub> fixation, respiration and carbon economy of wheat plants. *Rostlinna Vyroba* 40:689-696
- Sasek TW, Strain BR (1988) Effects of carbon dioxide enrichment on the growth and morphology of kudzu (*Pueraria lobata*). *Weed Science* 36:28-36
- Sasek TW, Strain BR (1990) Implications of atmospheric CO<sub>2</sub> enrichment and climatic change for the geographical distribution of two introduced vines in the U.S.A. *Climate Change* 16:31-51
- Sasek TW, Strain BR (1991) Effects of CO<sub>2</sub> enrichment on the growth and morphology of a native and an introduced honeysuckle vine. *American Journal of Botany* 78:69-75
- Schaffer B, Searle C, Whiley AW, Nissen RJ (1996) Effects of atmospheric CO<sub>2</sub> enrichment and root restriction on leaf gas exchange and growth of banana (*Musa*). *Physiologia Plantarum* 97:685-693
- Schaffer B, Whiley AW, Searle C (1999) Atmospheric CO<sub>2</sub> enrichment, root Restriction, photosynthesis, and dry-matter partitioning in subtropical and tropical fruit crops. *HortScience* 34:1033-1037
- Schaffer B, Whiley AW, Searle C, Nissen RJ (1997) Leaf gas exchange, dry matter partitioning, and mineral element concentrations in Mango as influenced by elevated atmospheric carbon dioxide and root restriction. *Journal of the American Society of Horticultural Science* 122:849-855

- Schapendonk AHCM, Van Oijen M, Dijkstra P, Pot CS, Jordi WJRM, Stoop GM (2000) Effects of elevated CO<sub>2</sub> concentration on photosynthetic acclimation and productivity of two potato cultivars grown in open-top chambers. *Australian Journal of Plant Physiology* 27:1119-1130
- Schappi B, Körner C (1996) Growth responses of an alpine grassland to elevated CO<sub>2</sub>. *Oecologia* 105:43-52
- Schenk U, Manderscheid R, Hugen J, Weigel H-J (1995) Effects of CO<sub>2</sub> enrichment and intraspecific competition on biomass partitioning, nitrogen content and microbial biomass carbon in soil of perennial ryegrass and white clover. *Journal of Experimental Botany* 46:987-993
- Schlimme M, Blaschke L, Lagrimini LM, Polle A (2002) Growth performance and lignification in tobacco with suppressed apoplastic anionic peroxidase activity under ambient and elevated CO<sub>2</sub> concentrations. *International Journal of Plant Sciences* 163:749-754
- Schortemeyer M, Atkin OK, McFarlane N, Evans JR (2002) N<sub>2</sub> fixation by *Acacia* species increases under elevated atmospheric CO<sub>2</sub>. *Plant, Cell and Environment* 25:567-579
- Seegmuller S, Rennenberg H (1994) Interactive effects of mycorrhization and elevated carbon dioxide on growth of young pedunculate oak (*Quercus rubur* L.) *Plant and Soil* 167:325-329
- Serraj R, Allen LH, Sinclair TR (1999) Soybean leaf growth and gas exchange response to drought under carbon dioxide enrichment. *Global Change Biology* 5:283-291
- Sicher RC (2005) Interactive effects of inorganic phosphate nutrition and carbon dioxide enrichment on assimilate partitioning in barley roots. *Physiologia Plantarum* 123:219-226
- Sicher RC, Kremer DF, Bunce JA (1995) Photosynthetic acclimation and photosynthate partitioning in soybean leaves in response to carbon dioxide enrichment. *Photosynthesis Research* 46:409-417
- Sigurdsson BD, Thorgeirsson H, Linder S (2001) Growth and dry-matter partitioning of young *Populus trichocarpa* in response to carbon dioxide concentration and mineral nutrient availability. *Tree Physiology* 21:941-950
- Silvola J, Ahlholm U (1995) Combined effects of CO<sub>2</sub> concentration and nutrient status on the biomass production and nutrient uptake of birch seedlings (*Betula pendula*). *Plant and Soil* 168-169:547-553
- Sionit N (1983) Response of soybean to two levels of mineral nutrition in CO<sub>2</sub>-enriched atmosphere. *Crop Science* 23:329-333
- Sionit N, Hellmers H, Strain BR (1980) Growth and yield of wheat under CO<sub>2</sub> enrichment and water stress. *Crop Science* 20:687-690
- Sionit N, Hellmers H, Strain BR (1982) Interaction of atmospheric CO<sub>2</sub> enrichment and irradiance on plant growth. *Agronomy Journal* 74:721-725
- Sionit N, Mortensen DA, Strain BR, Hellmers H (1981a) Growth response of wheat to CO<sub>2</sub> enrichment and different levels of mineral solution. *Agronomy Journal* 73:1023-1027
- Sionit N, Strain BR, Flint EP (1987) Interaction of temperature and CO<sub>2</sub> enrichment on soybean: growth and dry matter partitioning. *Canadian Journal of Plant Science* 67:59-67
- Sionit N, Strain BR, Hellmers H, Kramer PJ (1981b) Effects of atmospheric CO<sub>2</sub> concentration and water stress on water relations of wheat. *Botanical Gazette* 142:191-196

- Sionit N, Strain BR, Hellmers H, Riechers GH, Jaeger CH (1985) Long-term atmospheric CO<sub>2</sub> enrichment affects the growth and development of *Liquidambar styraciflua* and *Pinus taeda* seedlings. *Canadian Journal of Forest Research* 15:468-471
- Smart DR, Penuelas J (2005) Short-term CO<sub>2</sub> emissions from planted soil subject to elevated CO<sub>2</sub> and simulated precipitation. *Applied Soil Ecology* 28:247-257
- Smart DR, Ritchie K, Bloom AJ, Bugbee BB (1998) Nitrogen balance for wheat canopies (*Triticum aestivum* cv. Veery 10) grown under elevated and ambient CO<sub>2</sub> concentrations. *Plant, Cell and Environment* 21:753-763
- Smith SD, Strain BR, Sharkey TD (1987) Effects of CO<sub>2</sub> enrichment on four Great Basin grasses. *Functional Ecology* 1:139-143
- Srivastava AC, Pal M, Sengupta UK (2001) Root growth and nitrogen fixation activities of mungbean (*Phaseolus radiatus*) grown under elevated carbon dioxide. *Indian Journal of Agricultural Sciences* 71:203-204
- Stanghellini C, Bunce JA (1993) Response of photosynthesis and conductance to light, CO<sub>2</sub>, temperature and humidity in tomato plants acclimated to ambient and elevated CO<sub>2</sub>. *Photosynthetica* 29:487-497
- Stewart JD, Hoddinott J (1993) Photosynthetic acclimation to elevated atmospheric carbon dioxide and UV irradiation in *Pinus banksiana*. *Physiologia Plantarum* 88:493-500
- Stirling CM, Heddell-Cowie M, Jones ML, Ashenden TW, Sparks TH (1998) Effects of elevated CO<sub>2</sub> and temperature on growth and allometry of five native fast-growing annual species. *New Phytologist* 140:343-354
- Stock WD, Evans JR (2006) Effects of water availability, nitrogen supply and atmospheric CO<sub>2</sub> concentrations on plant nitrogen natural abundance values. *Functional Plant Biology* 33:219-227
- Stocklin J, Schweizer K, Körner C (1998) Effects of elevated CO<sub>2</sub> and phosphorus addition on productivity and community composition on intact monoliths from calcareous grassland. *Oecologia* 116:50-56
- Sullivan JH, Teramura AH (1994) The effects of UV-B radiation on loblolly pine. 3. Interaction with CO<sub>2</sub> enhancement. *Plant, Cell and Environment* 17:311-317
- Suter D, Frehner M, Fischer BU, Nosberger J, Luscher A (2002) Elevated CO<sub>2</sub> increases carbon allocation to the roots of *Lolium perenne* under free-air CO<sub>2</sub> enrichment but not in a controlled environment. *New Phytologist* 154:65-75
- Suter D, Nosberger J, Luscher A (2001) Response of perennial ryegrass to free-air CO<sub>2</sub> enrichment (FACE) is related to the dynamics of sward structure during regrowth. *Crop Science* 41:810-817
- Syvertsen JP, Graham JH (1999) Phosphorus supply and arbuscular mycorrhizas increase growth and net gas exchange responses of two *Citrus* spp. grown at elevated [CO<sub>2</sub>]. *Plant and Soil* 208:209-219
- Tang JJ, Chen J, Chen X (2006) Response of 12 weedy species to elevated CO<sub>2</sub> in low-phosphorus-availability soil. *Ecological Research* 21:664-670
- Tang S, Xi L, Zheng J, Li H (2003) Response to elevated CO<sub>2</sub> of Indian Mustard and sunflower growing on copper contaminated soil. *Bulletin of Environmental Contamination and Toxicology* 71:988-997
- Temperton VM, Grayston SJ, Jackson G, Barton CVM, Millard P, Jarvis PG (2003a) Effects of elevated carbon dioxide concentration on growth and nitrogen fixation in *Alnus glutinosa* in a long-term field experiment. *Tree Physiology* 23:1051-1059

- Temperton VM, Millard P, Jarvis PG (2003b) Does elevated atmospheric carbon dioxide affect internal nitrogen allocation in the temperate trees *Alnus glutinosa* and *Pinus sylvestris*. *Global Change Biology* 9:286-294
- Thomas RB, Bashkin MA, Richter DD (2000) Nitrogen inhibition of nodulation and N<sub>2</sub> fixation of a tropical N<sub>2</sub>-fixing tree (*Gliricidia sepium*) grown in elevated atmospheric CO<sub>2</sub>. *New Phytologist* 145:233-243
- Thomas RB, Richter DD, Ye H (1991) Nitrogen dynamics and growth of seedlings of an N-fixing tree (*Gliricidia sepium* (Jacq.) Walp) exposed to elevated atmospheric carbon dioxide. *Oecologia* 88:415-421
- Thomas RB, Strain BR (1991) Root restriction as a factor in photosynthetic acclimation of cotton seedlings grown in elevated carbon dioxide. *Plant Physiology* 96:627-634
- Thomas SC, Jasienski M, Bazzaz FA (1999) Early vs. asymptotic growth responses of herbaceous plants to elevated CO<sub>2</sub>. *Ecology* 80:1552-1567
- Tingey DT, McKane RB, Olszyk DM, Johnson MG, Rygielwicz PT (2003) Elevated CO<sub>2</sub> and temperature alter nitrogen allocation in Douglas-fir. *Global Change Biology* 9:1038-1050
- Tissue DT, Megonigal PJ, Thomas RB (1997) Nitrogenase activity and N<sub>2</sub> fixing are stimulated by elevated CO<sub>2</sub> in a tropical N<sub>2</sub>-fixing tree. *Oecologia* 109:28-33
- Tissue DT, Thomas RB, Strain BR (1996) Growth and photosynthesis of loblolly pine (*Pinus taeda*) after exposure to elevated CO<sub>2</sub> for 19 months in the field. *Tree Physiology* 16:49-59
- Tocquin P, Ormenese S, Pieltain A, Detry N, Bernier G, Perilleux C (2006) Acclimation of *Arabidopsis thaliana* to long-term CO<sub>2</sub> enrichment and nitrogen supply is basically a matter of growth rate adjustment. *Physiologia Plantarum* 128:677-688
- Tognetti R, Johnson JD (1999) Responses of growth, nitrogen and carbon partitioning to elevated atmospheric CO<sub>2</sub> concentration in live oak (*Quercus virginiana* Mill.) seedlings in relation to nutrient supply. *Annals of Forest Science* 56:91-105
- Tognoni F, Halevy AH, Wittwer SH (1967) Growth of bean and tomato plants as affected by root absorbed growth substances and atmospheric carbon dioxide. *Planta* 72:43-52
- Tolley LC, Strain BR (1984a) Effects of CO<sub>2</sub> enrichment and water stress on growth of *Liquidambar styraciflua* and *Pinus taeda* seedlings. *Canadian Journal of Botany* 62:2135-2139
- Tolley TC, Strain BR (1984b) Effects of CO<sub>2</sub> enrichment on growth of *Liquidambar styraciflua* and *Pinus taeda* seedlings under different irradiance levels. *Canadian Journal of Forest Research* 14:343-350
- Tosserams M, Visser A, Groen M, Kalis G, Magendans E, Rozema J (2001) Combined effects of CO<sub>2</sub> concentrations and enhanced UV-B radiation on faba bean. *Plant Ecology* 154:197-210
- Tremblay N, Yelle S, Gosselin A (1987) Effects of CO<sub>2</sub> enrichment, nitrogen and phosphorus fertilization on growth and yield of celery transplants. *HortScience* 22:875-876
- Tremmel DC, Patterson DT (1993) Responses of soybean and five weeds to CO<sub>2</sub> enrichment under two temperature regimes. *Canadian Journal of Plant Science* 73:1249-1260

- Tschaplinski TJ, Norby RJ, Wullschleger SD (1993) Responses of loblolly pine seedlings to elevated CO<sub>2</sub> and fluctuating water supply. *Tree Physiology* 13:283-296
- Tschaplinski TJ, Stewart DB, Hanson PJ, Norby RJ (1995) Interactions between drought and elevated CO<sub>2</sub> on growth and gas exchange of seedlings of three deciduous tree species. *New Phytologist* 129:63-71
- Upreti DC, Mahalaxmi V (2000) Effects of elevated CO<sub>2</sub> and nitrogen nutrition on photosynthesis, growth and carbon-nitrogen balance in *Brassica juncea*. *Journal of Agronomy and Crop Science* 184:271-276
- Upreti DC, Mishra RS, Abrol YP (1995) Effect of elevated CO<sub>2</sub> on the photosynthesis, growth and water relation of *Brassica* species under moisture stress. *Journal of Agronomy and Crop Science* 175:231-237
- Uselman SM, Qualls RG, Thomas RB (2000) Effects of increased atmospheric CO<sub>2</sub>, temperature, and soil N availability on root exudation of dissolved organic carbon by a N-fixing tree (*Robinia pseudocacia* L.). *Plant and Soil* 222:191-202
- Usuda H, Shimogawara K (1998) The effects of increased atmospheric carbon dioxide on growth, carbohydrates, and photosynthesis in radish, *Raphanus sativus*. *Plant and Cell Physiology* 39:1-7
- van de Staaij JWM, Lenssen GM, Stroetenga M, Rozema J (1993) The combined effects of elevated CO<sub>2</sub> levels and UV-B radiation on growth characteristics of *Elymus athericus* (= *E. pycnanathus*). *Vegetatio* 104/105:433-439
- van Ginkel JH, Gorissen A, van Veen JA (1996) Long-term decomposition of grass roots as affected by elevated atmospheric carbon dioxide. *Journal of Environmental Quality* 25:1122-1128
- Van Vuuren MMI, Robinson D, Fitter AH, Chasalow SD, Williamson L, Raven JA (1997) Effects of elevated atmospheric CO<sub>2</sub> and soil water availability on root biomass, root length, and N, P and K uptake by wheat. *New Phytologist* 135:455-465
- Vanhatalo M, Back J, Huttunen S (2003) Differential impacts of long-term CO<sub>2</sub> and O<sub>3</sub> exposure on growth of northern conifer and deciduous tree species. *Trees-Structure and Function* 17:211-220
- Vann CD, Megonigal JP (2002) Productivity responses of *Acer rubrum* and *Taxodium distichum* seedlings to elevated CO<sub>2</sub> and flooding. *Environmental Pollution* 116:S31-S36
- Vanoosten JJ, Wilkins D, Besford RT (1995) Acclimation of tomato to different carbon-dioxide concentrations- relationships between biochemistry and gas-exchange during leaf development. *New Phytologist* 130:357-367
- Verburg PSJ, Cheng W, Johnson DW, Schorran DE (2004) Nonsymbiotic nitrogen fixation in 3-year-old jeffrey pines and the role of elevated CO<sub>2</sub>. *Canadian Journal of Forest Research* 34:1979-1984
- Visser AJ, Tosserams M, Groen MW, Magendans GWH, Rozema J (1997) The combined effects of CO<sub>2</sub> concentration and solar UV-B radiation on faba bean growth in open-top chambers *Plant, Cell and Environment* 20:189-199
- Vivin P, Gross P, Aussenac G, Guehl JM (1995) Whole-plant CO<sub>2</sub> exchange, carbon partitioning and growth in *Quercus robur* seedlings exposed to elevated CO<sub>2</sub>. *Plant Physiology and Biochemistry* 33:201-211
- Vivin P, Guehl JM (1997) Changes in carbon uptake and allocation patterns in *Quercus robur* seedlings in response to elevated CO<sub>2</sub> and water stress: an evaluation with <sup>13</sup>C labelling. *Annals of Forest Science* 54:597-610

- Vivin P, Guehl JM, Clement A, Aussenac G (1996a) The effects of elevated CO<sub>2</sub> and water stress on whole plant CO<sub>2</sub> exchange, carbon allocation and osmoregulation in oak seedlings. *Annales des Sciences Forestieres* 53:447-459
- Vivin P, Martin F, Guehl JM (1996b) Acquisition and within-plant allocation of <sup>13</sup>C and <sup>15</sup>N in CO<sub>2</sub>-enriched *Quercus robur* plants. *Physiologia Plantarum* 98:89-96
- Vogel CS, Curtis PS, Thomas RB (1997) Growth and nitrogen accretion of dinitrogen-fixing *Alnus glutinosa* (L.) Gaertn. under elevated carbon dioxide. *Plant Ecology* 130:63-70
- Volin JC, Reich PB (1996) Interaction of elevated CO<sub>2</sub> and O<sub>3</sub> on growth, photosynthesis and respiration of three perennial species grown in low and high nitrogen. *Physiologia Plantarum* 97:678-684
- Wait DA, Jones CG, Wynn J, Woodward FI (1999) The fraction of expanding to expanded leaves determines the biomass response of *Populus* to elevated CO<sub>2</sub>. *Oecologia* 121:193-200
- Walker RF, Geisinger DR, Johnson DW, Ball JT (1997) Elevated atmospheric CO<sub>2</sub> and soil N fertility effects on growth, mycorrhizal colonization, and xylem water potential of juvenile ponderosa pine in a field soil. *Plant and Soil* 195:25-36
- Walker RF, Geisinger DR, Johnson DW, Ball JT (1998) Atmospheric CO<sub>2</sub> enrichment and soil N fertility effects on juvenile ponderosa pine: Growth ectomycorrhizal development, and xylem water potential. *Forest Ecology and Management* 102:33-44
- Wall GW et al. (2006) Interactive effects of elevated carbon dioxide and drought on wheat. *Agronomy Journal* 98:354-381
- Wan SQ, Norby RJ, Pregitzer KS, Ledford J, O'Neill EG (2004) CO<sub>2</sub> enrichment and warming of the atmosphere enhance both productivity and mortality of maple tree fine roots. *New Phytologist* 162:437-446
- Wand SJE, Midgley GF, Musil CF (1996) Physiological and growth responses of two African species, *Acacia karroo* and *Themeda triandra*, to combined increases in CO<sub>2</sub> and UV-B radiation. *Physiologia Plantarum* 98:882-890
- Wang XZ, Curtis PS (2001) Gender-specific responses of *Populus tremuloides* to atmospheric CO<sub>2</sub> enrichment. *New Phytologist* 150:675-684
- Wang XZ, Griffin KL (2003) Sex-specific physiological and growth responses to elevated atmospheric CO<sub>2</sub> in *Silene latifolia* Poiret. *Global Change Biology* 9:612-618
- Wang YP, Rey A, Jarvis PG (1998) Carbon balance of young birch trees grown in ambient and elevated atmospheric CO<sub>2</sub> concentration. *Global Change Biology* 4:797-807
- Wasaki J et al. (2005) Root exudation, phosphorus acquisition, and microbial diversity in the rhizosphere of white lupine as affected by phosphorus supply and atmospheric carbon dioxide concentration. *Journal of Environmental Quality* 34:2157-2166
- Watling JR, Press MC (1997) How is the relationship between C<sub>4</sub> cereal *Sorghum bicolor* and C<sub>3</sub> root hemi-parasites *Striga hermonthica* and *Striga asiatica* affected by elevated CO<sub>2</sub>? *Plant, Cell and Environment* 20:1292-1300
- Wayne PM, Bazzaz FA (1995) Seedling density modifies the growth responses of yellow birch maternal families to elevated carbon dioxide. *Global Change Biology* 1:315-324
- Weerakoon WM, Olszyk DM, Moss DN (1999) Effects of nitrogen nutrition on responses of rice seedlings to carbon dioxide. *Agriculture, Ecosystems and Environment* 72:1-8

- Wheeler RM, Tibbitts TW, Fitzpatrick AH (1991) Carbon dioxide effects on potato growth under different photoperiods and irradiance. *Crop Science* 31:1209-1213
- Wheeler TR, Morison JIL, Ellis RH, Hadley P (1994) The effects of CO<sub>2</sub> temperature and their interaction on the growth and yield of carrot (*Daucus carota* L.). *Plant, Cell and Environment* 17:1275-1284
- Whitehead SJ, Caporn SJM, Press MC (1997) Effects of elevated CO<sub>2</sub>, nitrogen and phosphorus on the growth and photosynthesis of two upland perennials: *Calluna vulgaris* and *Pteridium aquilinum*. *New Phytologist* 135:201-211
- Wieneke S, Prati D, Brandl R, Stocklin J (2004) Genetic variation in *Sanguisorba minor* after 6 years in situ selection under elevated CO<sub>2</sub>. *Global Change Biology* 10:1389-1401
- Wilkins D, Van Oosten JJ, Besford RT (1994) Effects of elevated CO<sub>2</sub> on growth and chloroplast proteins in *Prunus avium*. *Tree Physiology* 14:769-779
- Will RE, Teskey RO (1997) Effect of elevated carbon dioxide concentration and root restriction on net photosynthesis, water relations and foliar carbohydrate status of loblolly pine seedlings. *Tree Physiology* 17:655-661
- Williams LE, DeJong TM, Phillips DA (1981) Carbon and nitrogen limitations on soybean seedling development. *Plant Physiology* 68:1206-1209
- Wilsey BJ (1996) Urea additions and defoliation affect plant responses to elevated CO<sub>2</sub> in a C<sub>3</sub> grass from Yellowstone National Park. *Oecologia* 108:321-327
- Wilsey BJ (2001) Effects of elevated CO<sub>2</sub> on the response of *Phleum pratense* and *Poa pratensis* to aboveground defoliation and root feeding nematodes. *International Journal of Plant Sciences* 162:1275-1282
- Wilsey BJ, Coleman JS, McNaughton SJ (1997) Effects of elevated CO<sub>2</sub> and defoliation on grasses: A comparative ecosystem approach. *Ecological Applications* 7:844-853
- Wilsey BJ, McNaughton SJ, Coleman JS (1994) Will increases in atmospheric CO<sub>2</sub> affect regrowth following grazing in C<sub>4</sub> grasses from tropical grasslands? A test with *Sporobolus kentrophyllus*. *Oecologia* 99:141-144
- Winter K, Garcia M, Gottsberger R, Popp M (2001) Marked growth response of communities of two tropical trees species to elevated CO<sub>2</sub> when soil nutrient limitation is removed. *Flora* 196:47-58
- Winter K, Garcia M, Lovelock CE, Gottsberger R, Popp M (2000) Responses of model communities of two tropical tree species to elevated atmospheric CO<sub>2</sub>: growth on unfertilized soil. *Flora* 195:289-302
- Winter K, Lovelock CE (1999) Growth responses of seedlings of early and late successional tropical forest trees to elevated atmospheric CO<sub>2</sub>. *Flora* 194:221-227
- Winter K, Richter A, Engelbrecht B, Posada J, Virgo A, Popp M (1997) Effect of elevated CO<sub>2</sub> on growth and crassulacean-acid-metabolism activity of *Kalanchoe pinnata* under tropical conditions. *Planta* 201:389-396
- Wolf J (1996a) Effects of nutrient (NPK) supply on faba bean response to elevated atmospheric CO<sub>2</sub>. *Netherlands Journal of Agricultural Science* 44:163-178
- Wolf J (1996b) Effects of nutrient supply (NPK) on spring wheat response to elevated atmospheric CO<sub>2</sub>. *Plant and Soil* 185:113-123

- Wolf J (1998) Effects of nutrient (NPK) supply on sugar beet response to elevated atmospheric CO<sub>2</sub>. *Netherlands Journal of Agricultural Science* 46:157-170
- Wong SC, Osmond CB (1991) Elevated atmospheric partial-pressure of CO<sub>2</sub> and plant-growth. 3. Interactions between *Triticum aestivum* (C<sub>3</sub>) and *Echinochloa frumentacea* (C<sub>4</sub>) during growth in mixed culture under different CO<sub>2</sub>, N-nutrition and irradiance treatments, with emphasis on belowground responses estimated using delta <sup>13</sup>C value of root biomass. *Australian Journal of Plant Physiology* 18:137-152
- Wood CW, Torbert HA, Rogers HH, Runion GB, Prior SA (1994) Free-air CO<sub>2</sub> enrichment effects on soil carbon and nitrogen. *Agricultural and Forest Meteorology* 70:103-116
- Wulff R, Strain B (1982) Effects of CO<sub>2</sub> enrichment on growth and photosynthesis in *Desmodium paniculatum*. *Canadian Journal of Botany* 60:1084-1091
- Wyse R (1980) Growth of sugarbeet seedlings in various atmospheres of oxygen and carbon dioxide. *Crop Science* 20:456-458
- Xiao C-W, Sun OJ, Zhou G-S, Zhao J-Z, Wu G (2005) Interactive effects of elevated CO<sub>2</sub> and drought stress on leaf water potential and growth in *Caragana intermedia*. *Trees* 19:711-720
- Xu DQ, Gifford RM, Chow WS (1994) Photosynthetic acclimation in pea and soybean to high atmospheric CO<sub>2</sub> partial pressure. *Plant Physiology* 106:661-671
- Yakimchuk R, Hoddinott J (1994) The influence of ultraviolet-B light and carbon dioxide enrichment on the growth and physiology of seedlings of three conifer species. *Canadian Journal of Forest Research* 24:1-8
- Yazaki K et al. (2004) Effects of elevated CO<sub>2</sub> concentration on growth, annual ring structure and photosynthesis in *Larix kaempferi* seedlings. *Tree Physiology* 24:951-959
- Yelle S, Gosselin A, Trudel MJ (1987) Effect of atmospheric CO<sub>2</sub> concentration and root-zone temperature on growth, mineral nutritional and nitrate reductase activity of greenhouse tomato. *Journal of the American Society of Horticultural Science* 112:1036-1040
- Yoder CK, Vivin P, Defalco LA, Seemann JR, Nowak RS (2000) Root growth and function of three Mojave Desert grasses in response to elevated atmospheric CO<sub>2</sub> concentration. *New Phytologist* 145:245-256
- Yong JWH, Wong SC, Letham DS, Hocart CH, Farquhar GD (2000) Effects of elevated CO<sub>2</sub> and nitrogen nutrition on cytokinins in the xylem sap and leaves of cotton. *Plant Physiology* 124:767-779
- Zak DR, Pregitzer KS, Curtis PS, Teeri JA, Fogel R, Randlett DL (1993) Elevated atmospheric CO<sub>2</sub> and feedback between carbon and nitrogen cycles. *Plant and Soil* 151:105-117
- Zak DR, Pregitzer KS, Curtis PS, Vogel CS, Holmes WE, Lussenhop J (2000) Atmospheric CO<sub>2</sub>, soil-N availability, and allocation of biomass and nitrogen by *Populus tremuloides*. *Ecological Applications* 10:34-46
- Zebian KJ, Reekie EG (1998) The interactive effects of atmospheric carbon dioxide and light on stem elongation in seedlings of four species. *Annals of Botany* 81:185-193
- Zhang JH, Lechowicz MJ (1995) Responses to CO<sub>2</sub> enrichment by two genotypes of *Arabidopsis thaliana* differing in their sensitivity to nutrient availability. *Annals of Botany* 75:491-499

- Zhang S, Dang Q-L, Yu X (2006) Nutrient and [CO<sub>2</sub>] elevation had synergistic effects on biomass production but not on biomass allocation of white birch seedlings. *Forest Ecology and Management* 234:238-244
- Zhao D, Reddy KR, Kakani VG, Read JJ, Sullivan JH (2003) Growth and physiological responses of cotton (*Gossypium hirsutum* L.) to elevated carbon dioxide and ultraviolet-B radiation under controlled environmental conditions. *Plant, Cell and Environment* 26:771-782
- Ziska LH (2003) Evaluation of the growth response of six invasive species to past, present and future atmospheric carbon dioxide. *Journal of Experimental Botany* 54:395-404
- Ziska LH, Bunce JA (1994) Increasing growth temperature reduces the stimulatory effect of elevated CO<sub>2</sub> on photosynthesis or biomass in 2 perennial species. *Physiologia Plantarum* 91:183-190
- Ziska LH, Bunce JA (1995) Growth and photosynthetic response of three soybean cultivars to simultaneous increases in growth temperature and CO<sub>2</sub>. *Physiologia Plantarum* 94:575-584
- Ziska LH, Bunce JA (1997a) Influence of increasing carbon dioxide concentration on the photosynthetic and growth stimulation of selected C<sub>4</sub> crops and weeds. *Photosynthesis Research* 54:199-208
- Ziska LH, Bunce JA (1997b) The role of temperature in determining the stimulation of CO<sub>2</sub> assimilation at elevated carbon dioxide concentration in soybean seedlings. *Physiologia Plantarum* 100:126-132
- Ziska LH, Bunce JA (1999) Effect of elevated carbon dioxide concentration at night on the growth and gas exchange of selected C<sub>4</sub> species. *Australian Journal of Plant Physiology* 26:71-77
- Ziska LH, Bunce JA, Caulfield FA (2001) Rising atmospheric carbon dioxide and seed yield of soybean genotypes. *Crop Science* 41:385-391
- Ziska LH, Caulfield FA (2000) Rising CO<sub>2</sub> and pollen production of common ragweed (*Ambrosia artemisiifolia*), a known allergy-inducing species: implications for public health. *Australian Journal of Plant Physiology* 3936:893-898
- Ziska LH, Faulkner S, Lydon J (2004) Changes in biomass and root:shoot ratio of field-grown Canada thistle (*Cirsium arvense*), a noxious, invasive weed, with elevated CO<sub>2</sub>: implications for control with glyphosate. *Weed Science* 52:584-588
- Ziska LH, Hogan KP, Smith AP, Drake BG (1991) Growth and photosynthetic response of nine tropical species with long-term exposure to elevated carbon dioxide. *Oecologia* 86:383-389
- Ziska LH, Namuco O, Moya T, Quilang J (1997) Growth and yield response of field-grown tropical rice to increasing carbon dioxide and air temperature. *Agronomy Journal* 89:45-53
- Ziska LH, Sicher RC, Bunce JA (1999) The impact of elevated carbon dioxide on the growth and gas exchange of three C<sub>4</sub> species differing in CO<sub>2</sub> leak rates. *Physiologia Plantarum* 105:74-80
- Ziska LH, Sicher RC, Kremer DF (1995) Reversibility of photosynthetic acclimation of Swiss chard and sugarbeet grown at elevated concentrations of CO<sub>2</sub>. *Physiologia Plantarum* 95:355-364
- Ziska LH, Teramura AH (1992a) CO<sub>2</sub> enhancement of growth and photosynthesis in rice (*Oryza sativa*) - modification by increased ultraviolet-B radiation. *Plant Physiology* 99:473-481

Ziska LH, Teramura AH (1992b) Intraspecific variation in the response of rice (*Oryza sativa*) to increased CO<sub>2</sub> - photosynthetic, biomass and reproductive characteristics. *Physiologia Plantarum* 84:269-276
